# Supplementary material for: Electrochemical oxidative regio- and stereo-selective thio(seleno)cyanation of enamides and mechanistic insights
Source: Royal Society of Chemistry journal article supplement (doi:10.1039/d2gc01932a), 2022-01-01

Supplementary Information for

**Electrochemical oxidative regio- and stereo-selective  
thio(seleno)cyanation of enamides and mechanistic insights**

Qingyun Gu,<sup>‡a</sup> Zhenfeng Cheng,<sup>‡a</sup> Xing Xiong,<sup>a</sup> Biao Xiong,<sup>a</sup> Yu Zhao,<sup>a</sup> Hua-Dong Xu,<sup>a</sup> Yanan Zhang,<sup>a</sup> Xiaodong Qiu<sup>a</sup> and Xiaobao Zeng<sup>\*a</sup>

<sup>a</sup> School of Pharmacy, Nantong University, 19 Qixiu Road, Nantong, Jiangsu Province 226001, People's Republic of China

**List**

|                                                                                  |               |
|----------------------------------------------------------------------------------|---------------|
| <b>1. General information.....</b>                                               | <b>S1</b>     |
| <b>2. Preparation and characterizations of compounds 3aa-w, 5aa-i, 6-11.....</b> | <b>S1-19</b>  |
| <b>3. Current efficiency of reaction with representative substrates.....</b>     | <b>S19</b>    |
| <b>4. Procedure for cyclic voltammetry (CV).....</b>                             | <b>S20</b>    |
| <b>5. Gram-Scale synthesis of 3aa.....</b>                                       | <b>S20</b>    |
| <b>6. X-ray Crystallographic Data of 11.....</b>                                 | <b>S21-26</b> |
| <b>7. References.....</b>                                                        | <b>S26</b>    |
| <b>8. <sup>1</sup>H NMR and <sup>13</sup>C NMR spectra of compounds.....</b>     | <b>S27-67</b> |

## 1. General information

All  $^1\text{H}$  NMR (400 MHz) and  $^{13}\text{C}$  NMR (100 MHz) spectra were recorded in  $\text{CDCl}_3$ . TMS was used as an internal reference and  $J$  values are given in Hz. HR-MS were obtained on a Bruker micrOTOF-Q II spectrometer. PE is petroleum ether (60-90 °C). All enamides (**1a-y**, **10**) are known compounds, they were prepared according to the reported procedures.<sup>1</sup> Unless otherwise noted, materials obtained from commercial suppliers were used without further purification.

## 2. Preparation and characterizations of compounds **3aa-w**, **5aa-i**, **6-11**

In 15 mL three-necked round bottom flask, with carbon plate anode (10 mm × 10 mm × 0.3 mm), iron plate cathode (10 mm × 10 mm × 0.3 mm), a mixture of enamides (**1a-y**, 0.4 mmol),  $\text{NH}_4\text{SCN}$  or  $\text{KSeCN}$  (**2a** or **4a**, 1.6 mmol, 4 equiv.),  $\text{LiBF}_4$  (113 mg, 3 equiv.) in  $\text{CH}_3\text{CN}/\text{HOAc}$  (6 mL, 3:1) was stirred with constant current of 20 mA at room temperature for 3 h (monitored by TLC). After it was cooled down to room temperature, the mixture was poured into water (15 mL) and was extracted with EtOAc (3 × 15 mL). The combined organic layers were washed with brine (2 × 15 mL) and dried over  $\text{MgSO}_4$ . The solvent was removed by vacuum and the residue was purified by column chromatography (20% EtOAc in PE) to give the corresponding products **3aa-w**, **5aa-i**.

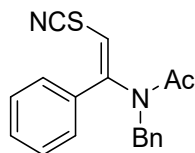

**(E)-N-benzyl-N-(1-phenyl-2-thiocyanatovinyl)acetamide (3aa)**. 108.1 mg (88%); White solid; mp 80-82 °C (lit.<sup>2</sup> 77-79 °C);  $^1\text{H}$  NMR (400MHz,  $\text{CDCl}_3$ )  $\delta$  7.49-7.46 (m, 3H), 7.34-7.28 (m, 3H), 7.24-7.22 (m, 2H), 7.17-7.15 (m, 2H), 5.92 (s, 1H), 4.57 (s, 2H), 2.21 (s, 3H).  $^{13}\text{C}$  NMR (100 MHz,

$\text{CDCl}_3$ )  $\delta$  170.1, 145.5, 136.4, 132.2, 130.7, 129.3, 128.6, 128.5, 128.2, 127.8, 112.2, 109.4, 49.8, 22.4.

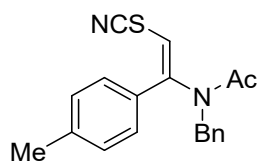

**(E)-N-benzyl-N-(2-thiocyanato-1-(p-tolyl)vinyl)acetamide (3ab).** 110.6 mg (86%); White solid; mp 96-98 °C (lit.<sup>2</sup> 98-100 °C);  $^1\text{H NMR}$  (400MHz,  $\text{CDCl}_3$ )  $\delta$  7.31-7.26 (m, 5H), 7.17-7.15 (m, 2H), 7.13-7.11 (m, 2H), 5.85 (s, 1H), 4.56 (s, 2H), 2.42 (s, 3H), 2.20 (s, 3H).  $^{13}\text{C NMR}$  (100 MHz,  $\text{CDCl}_3$ )  $\delta$  170.2, 145.7, 141.3, 136.5, 123.0, 129.3, 128.7, 128.6, 128.2, 127.8, 111.3, 109.6, 49.8, 22.4, 21.4.

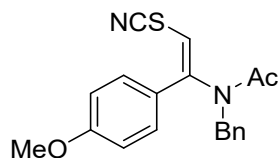

**(E)-N-benzyl-N-(1-(4-methoxyphenyl)-2-thiocyanatovinyl)acetamide (3ac).** 117.8 mg (87%); White solid; mp 84-86 °C (lit.<sup>2</sup> 85-87 °C);  $^1\text{H NMR}$  (400MHz,  $\text{CDCl}_3$ )  $\delta$  7.34-7.27 (m, 3H), 7.18-7.15 (m, 4H), 6.98-6.96 (m, 2H), 5.80 (s, 1H), 4.56 (s, 2H), 3.86 (s, 3H), 2.19 (s, 3H).  $^{13}\text{C NMR}$  (100 MHz,  $\text{CDCl}_3$ )  $\delta$  170.1, 161.2, 145.7, 136.5, 129.8, 128.6, 128.5, 127.7, 124.2, 114.6, 110.0, 109.6, 55.4, 49.8, 22.4.

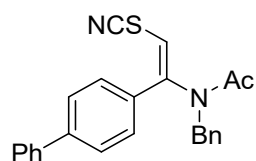

**(E)-N-(1-([1,1'-biphenyl]-4-yl)-2-thiocyanatovinyl)-N-**

**benzylacetamide (3ad).** 125.2 mg (82%); White solid; mp 120-122 °C (lit.<sup>2</sup> 119-121 °C); <sup>1</sup>H NMR (400MHz, CDCl<sub>3</sub>) δ 7.69 (d, *J* = 8.3 Hz, 2H), 7.63-7.61 (m, 2H), 7.50-7.46 (m, 2H), 7.43-7.38 (m, 1H), 7.33-7.29 (m, 5H), 7.21-7.18 (m, 2H), 5.94 (s, 1H), 4.62 (s, 2H), 2.23 (s, 3H). <sup>13</sup>C NMR (100 MHz, CDCl<sub>3</sub>) δ 170.2, 145.3, 143.6, 139.4, 136.5, 131.0, 129.0, 128.7 (2C), 128.6, 128.2, 127.9, 127.8, 127.1, 112.1, 109.4, 50.0, 22.4.

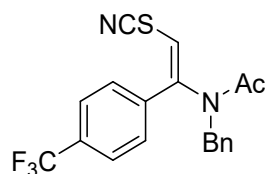

**(E)-N-benzyl-N-(2-thiocyanato-1-(4-**

**(trifluoromethyl)phenyl)vinyl)acetamide (3ae)<sup>[2]</sup>.** 84.2 mg (56%); Yellow oil; <sup>1</sup>H NMR (400MHz, CDCl<sub>3</sub>) δ 7.73 (d, *J* = 8.1 Hz, 2H), 7.37-7.30 (m, 5H), 7.16-7.13 (m, 2H), 6.07 (s, 1H), 4.59 (s, 2H), 2.22 (s, 3H). <sup>13</sup>C NMR (100 MHz, CDCl<sub>3</sub>) δ 170.0, 144.3, 136.1, 136.0, 132.5 (q, *J* = 32.9 Hz), 128.8, 128.7, 128.6, 128.1, 126.3 (q, *J* = 3.7 Hz), 123.4 (q, *J* = 271.3 Hz), 114.2, 108.8, 50.2, 22.4. <sup>19</sup>F NMR (376 MHz, CDCl<sub>3</sub>) δ -62.99.

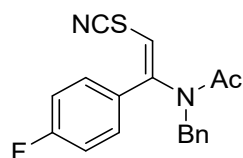

**(E)-N-benzyl-N-(1-(4-fluorophenyl)-2-thiocyanatovinyl)acetamide**

**(3af).** 99.1 mg (76%); White solid; mp 48-50 °C (lit.<sup>2</sup> 46-48 °C); <sup>1</sup>H NMR (400MHz, CDCl<sub>3</sub>) δ 7.34-7.28 (m, 3H), 7.25-7.21 (m, 2H), 7.18-7.13 (m,

4H), 5.93 (s, 1H), 4.56 (s, 2H), 2.20 (s, 3H).  $^{13}\text{C}$  NMR (100 MHz,  $\text{CDCl}_3$ )  $\delta$  170.0, 164.6 (d,  $J = 251.5$  Hz), 144.9, 136.3, 130.4 (d,  $J = 8.6$  Hz), 128.6, 128.5, 128.3 (d,  $J = 3.3$  Hz), 127.9, 116.6 (d,  $J = 21.9$  Hz), 112.0, 109.1, 49.9, 22.4.  $^{19}\text{F}$  NMR (376 MHz,  $\text{CDCl}_3$ )  $\delta$  -107.85.

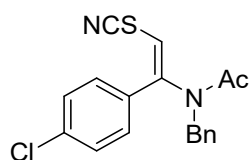

**(E)-N-benzyl-N-(1-(4-chlorophenyl)-2-thiocyanatovinyl)acetamide**

**(3ag).** 102.9 mg (75%); Yellow solid; mp 90-92 °C (lit.<sup>2</sup> 90-92 °C);  $^1\text{H}$  NMR (400MHz,  $\text{CDCl}_3$ )  $\delta$  7.44 (d,  $J = 8.4$  Hz, 2H), 7.34-7.29 (m, 3H), 7.18-7.13 (m, 4H), 5.95 (s, 1H), 4.57 (s, 2H), 2.19 (s, 3H).  $^{13}\text{C}$  NMR (100 MHz,  $\text{CDCl}_3$ )  $\delta$  170.0, 144.7, 136.8, 136.2, 130.7, 129.6, 129.5, 128.7, 128.6, 127.9, 112.6, 109.0, 50.0, 22.4.

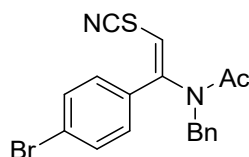

**(E)-N-benzyl-N-(1-(4-bromophenyl)-2-thiocyanatovinyl)acetamide**

**(3ah).** 105.7 mg (68%); Yellow solid; mp 89-91 °C (lit.<sup>2</sup> 91-93 °C);  $^1\text{H}$  NMR (400MHz,  $\text{CDCl}_3$ )  $\delta$  7.60 (d,  $J = 8.5$  Hz, 2H), 7.33-7.29 (m, 3H), 7.14 (dd,  $J = 7.4, 2.1$  Hz, 2H), 7.11-7.08 (m, 2H), 5.96 (s, 1H), 4.57 (s, 2H), 2.19 (s, 3H).  $^{13}\text{C}$  NMR (100 MHz,  $\text{CDCl}_3$ )  $\delta$  170.0, 144.7, 136.2, 132.6, 131.2, 129.7, 128.7, 128.6, 127.9, 125.1, 112.7, 109.0, 50.0, 22.4.

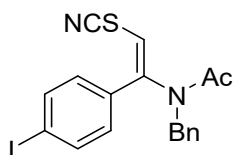

**(E)-N-benzyl-N-(1-(4-iodophenyl)-2-thiocyanatovinyl)acetamide (3ai).**

106.4 mg (61%); Yellow solid; mp 96-98 °C (lit.<sup>2</sup> 98-100 °C); <sup>1</sup>H NMR (400MHz, CDCl<sub>3</sub>) δ 7.81 (d, *J* = 8.4 Hz, 2H), 7.33-7.28 (m, 3H), 7.15-7.13 (m, 2H), 6.96-6.94 (m, 2H), 5.95 (s, 1H), 4.56 (s, 2H), 2.19 (s, 3H). <sup>13</sup>C NMR (100 MHz, CDCl<sub>3</sub>) δ 170.0, 144.8, 138.5, 136.2, 131.8, 129.7, 128.7, 128.6, 127.9, 112.7, 109.0, 97.1, 50.0, 22.4.

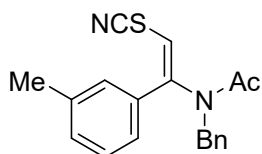

**(E)-N-benzyl-N-(2-thiocyanato-1-(m-tolyl)vinyl)acetamide (3aj).** 115.2

mg (89%); White solid; mp 94-96 °C (lit.<sup>2</sup> 93-95 °C); <sup>1</sup>H NMR (400MHz, CDCl<sub>3</sub>) δ 7.37-7.27 (m, 5H), 7.18-7.16 (m, 2H), 7.04-6.99 (m, 2H), 5.90 (s, 1H), 4.57 (s, 2H), 2.39 (s, 3H), 2.21 (s, 3H). <sup>13</sup>C NMR (100 MHz, CDCl<sub>3</sub>) δ 170.3, 145.6, 139.4, 136.5, 132.2, 131.6, 129.1, 128.7, 128.6, 128.5, 127.8, 125.5, 112.1, 109.6, 49.9, 22.4, 21.4.

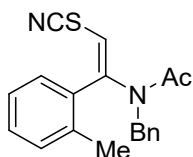

**(E)-N-benzyl-N-(2-thiocyanato-1-(o-tolyl)vinyl)acetamide (3ak).** 103.0

mg (80%); White solid; mp 92-94 °C (lit.<sup>2</sup> 93-95 °C); <sup>1</sup>H NMR (400MHz, CDCl<sub>3</sub>) δ 7.39-7.34 (m, 1H), 7.32-7.22 (m, 5H), 7.09-7.07 (m, 2H), 7.03

(d,  $J = 3$  Hz, 1H), 6.13 (s, 1H), 4.50 (s, 2H), 2.35 (s, 3H), 2.18 (s, 3H).  $^{13}\text{C}$  NMR (100 MHz,  $\text{CDCl}_3$ )  $\delta$  170.3, 146.0, 137.0, 136.6, 131.4, 131.4, 130.5, 129.6, 128.6, 127.6, 127.5, 126.5, 110.7, 109.8, 49.5, 22.8, 19.4.

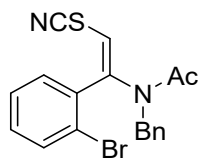

**(*E*)-*N*-benzyl-*N*-(1-(2-bromophenyl)-2-thiocyanatovinyl)acetamide**

**(3al)**<sup>[2]</sup>. 131.8 mg (85%); Yellow oil;  $^1\text{H}$  NMR (400MHz,  $\text{CDCl}_3$ )  $\delta$  7.67-7.65 (m, 1H), 7.38-7.31 (m, 2H), 7.32-7.26 (m, 3H), 7.14-7.09 (m, 3H), 6.17 (s, 1H), 4.56 (s, 2H), 2.35 (s, 3H).  $^{13}\text{C}$  NMR (100 MHz,  $\text{CDCl}_3$ )  $\delta$  170.6, 146.2, 136.5, 134.0, 132.9, 131.8, 131.7, 128.6, 127.8, 127.7, 127.5, 122.9, 111.6, 109.5, 50.1, 22.9.

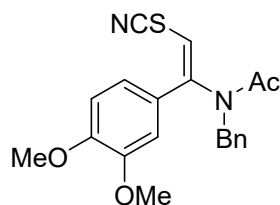

**(*E*)-*N*-benzyl-*N*-(1-(3,4-dimethoxyphenyl)-2-**

**thiocyanatovinyl)acetamide (3am)**. 93.6 mg (64%); Yellow solid; mp 128-130 °C (lit.<sup>2</sup> 129-131 °C);  $^1\text{H}$  NMR (400MHz,  $\text{CDCl}_3$ )  $\delta$  7.34-7.28 (m, 3H), 7.20-7.18 (m, 2H), 6.92 (d,  $J = 8.3$  Hz, 1H), 6.81 (dd,  $J = 8.3, 2.2$  Hz, 1H), 6.58 (d,  $J = 2.1$  Hz, 1H), 5.90 (s, 1H), 4.63 (s, 2H), 3.93 (s, 3H), 3.80 (s, 3H), 2.18 (s, 3H).  $^{13}\text{C}$  NMR (100 MHz,  $\text{CDCl}_3$ )  $\delta$  170.3, 150.9, 149.5, 145.7, 136.6, 128.7, 128.6, 127.8, 124.7, 121.8, 111.1, 110.3 (2C), 109.7, 56.0, 55.9, 50.3, 22.5.

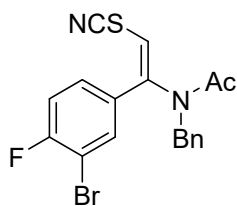

**(E)-N-benzyl-N-(1-(3-bromo-4-fluorophenyl)-2-thiocyanatovinyl)acetamide (3an).** 95.3 mg (59%); White solid; mp 144-146 °C (lit.<sup>2</sup> 144-146 °C); <sup>1</sup>H NMR (400MHz, CDCl<sub>3</sub>) δ 7.39 (dd, *J* = 6.3, 2.2 Hz, 1H), 7.36-7.30 (m, 3H), 7.23-7.19 (m, 1H), 7.19-7.16 (m, 1H), 7.16-7.13 (m, 2H), 5.99 (s, 1H), 4.58 (s, 2H), 2.21 (s, 3H). <sup>13</sup>C NMR (100 MHz, CDCl<sub>3</sub>) δ 170.0, 160.1 (d, *J* = 252.3 Hz), 143.6, 136.1, 133.4, 129.9 (d, *J* = 3.7 Hz), 129.3 (d, *J* = 8.2 Hz), 128.8, 128.6, 128.1, 117.4 (d, *J* = 22.9 Hz), 113.3, 110.6 (d, *J* = 21.6 Hz), 108.7, 50.2, 22.5. <sup>19</sup>F NMR (376 MHz, CDCl<sub>3</sub>) δ -101.94.

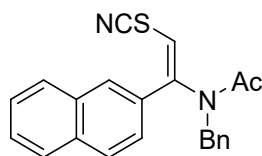

**(E)-N-benzyl-N-(1-(naphthalen-2-yl)-2-thiocyanatovinyl)acetamide (3ao)**<sup>[2]</sup>. 93.3 mg (65%); Yellow oil; <sup>1</sup>H NMR (400MHz, CDCl<sub>3</sub>) δ 7.93 (d, *J* = 8.6 Hz, 1H), 7.90-7.84 (m, 2H), 7.67 (s, 1H), 7.62-7.56 (m, 2H), 7.32-7.29 (m, 4H), 7.19-7.17 (m, 2H), 6.01 (s, 1H), 4.62 (s, 2H), 2.26 (s, 3H). <sup>13</sup>C NMR (100 MHz, CDCl<sub>3</sub>) δ 170.3, 145.6, 136.5, 133.9, 132.8, 129.6, 129.4, 128.8, 128.7, 128.6, 128.4, 127.9, 127.8 (2C), 127.3, 124.2, 112.4, 109.5, 50.0, 22.5.



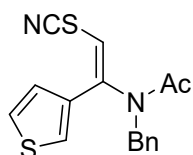

**(E)-N-benzyl-N-(2-thiocyanato-1-(thiophen-3-yl)vinyl)acetamide**

**(3ap)**. 95.1 mg (76%); White solid; mp 60-62 °C (lit.<sup>2</sup> 60-62 °C); <sup>1</sup>H NMR (400MHz, CDCl<sub>3</sub>) δ 7.44 (dd, *J* = 5.1, 2.9 Hz, 1H), 7.37-7.36 (m, 1H), 7.34-7.29 (m, 3H), 7.21-7.19 (m, 2H), 7.07 (dd, *J* = 5.1, 1.4 Hz, 1H), 5.84 (s, 1H), 4.64 (s, 2H), 2.12 (s, 3H). <sup>13</sup>C NMR (100 MHz, CDCl<sub>3</sub>) δ 169.9, 140.4, 136.5, 134.1, 128.8, 128.6, 127.9, 127.8, 127.7, 126.3, 112.0, 109.1, 50.3, 22.2.

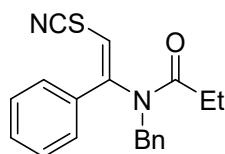

**(E)-N-benzyl-N-(1-phenyl-2-thiocyanatovinyl)propionamide (3aq)**<sup>[2]</sup>.

97.7 mg (76%); Yellow oil; <sup>1</sup>H NMR (400MHz, CDCl<sub>3</sub>) δ 7.48-7.45 (m, 3H), 7.34-7.28 (m, 3H), 7.23-7.20 (m, 2H), 7.19-7.16 (m, 2H), 5.91 (s, 1H), 4.58 (s, 2H), 2.44 (q, *J* = 7.4 Hz, 2H), 1.20 (t, *J* = 7.4 Hz, 3H). <sup>13</sup>C NMR (100 MHz, CDCl<sub>3</sub>) δ 173.7, 145.2, 136.6, 132.4, 130.6, 129.3, 128.7, 128.6, 128.2, 127.7, 112.0, 109.5, 50.1, 27.6, 9.9.

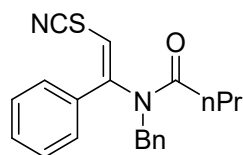

**(E)-N-benzyl-N-(1-phenyl-2-thiocyanatovinyl)butyramide (3ar)**<sup>[2]</sup>.

101.7 mg (76%); Yellow oil; <sup>1</sup>H NMR (400MHz, CDCl<sub>3</sub>) δ 7.49-7.45 (m,

3H), 7.34-7.28 (m, 3H), 7.24-7.21 (m, 2H), 7.18-7.16 (m, 2H), 5.88 (s, 1H), 4.58 (s, 2H), 2.40 (t,  $J = 7.4$  Hz, 2H), 1.74 (h,  $J = 7.3$  Hz, 2H), 0.96 (t,  $J = 7.4$  Hz, 3H).  $^{13}\text{C}$  NMR (100 MHz,  $\text{CDCl}_3$ )  $\delta$  172.9, 145.3, 136.7, 132.5, 130.7, 129.3, 128.7, 128.6, 128.2, 127.8, 111.9, 109.5, 50.0, 36.1, 19.1, 13.8.

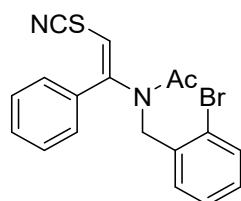

**(E)-N-(2-bromobenzyl)-N-(1-phenyl-2-thiocyanatovinyl)acetamide**

**(3as).** 109.8 mg (71%); Yellow solid; mp 142-144 °C (lit.<sup>2</sup> 140-142 °C);  $^1\text{H}$  NMR (400MHz,  $\text{CDCl}_3$ )  $\delta$  7.52 (dd,  $J = 8.0, 1.3$  Hz, 1H), 7.47-7.44 (m, 3H), 7.27 (td,  $J = 7.5, 1.3$  Hz, 1H), 7.21-7.18 (m, 3H), 7.17-7.13 (m, 1H), 6.09 (s, 1H), 4.77 (s, 2H), 2.22 (s, 3H).  $^{13}\text{C}$  NMR (100 MHz,  $\text{CDCl}_3$ )  $\delta$  170.4, 145.2, 135.5, 133.0, 132.2, 130.8, 130.7, 129.4, 129.2, 128.2, 127.7, 123.9, 112.8, 109.5, 49.8, 22.4.

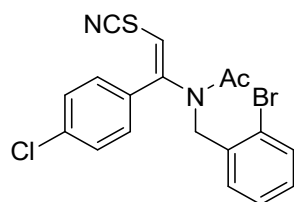

**(E)-N-(2-bromobenzyl)-N-(1-(4-chlorophenyl)-2-**

**thiocyanatovinyl)acetamide (3at).** 98.7 mg (58%); White solid; mp 140-142 °C (lit.<sup>2</sup> 141-143 °C);  $^1\text{H}$  NMR (400MHz,  $\text{CDCl}_3$ )  $\delta$  7.53 (d,  $J = 8, 1$  Hz), 7.44-7.42 (m, 2H), 7.29-7.25 (m, 1H), 7.22-7.13 (m, 4H), 6.11 (s, 1H), 4.76 (s, 2H), 2.21 (s, 3H).  $^{13}\text{C}$  NMR (100 MHz,  $\text{CDCl}_3$ )  $\delta$  170.2, 144.2,

136.8, 135.3, 133.0, 130.8, 130.6, 129.6(2C), 129.5, 127.8, 123.9, 113.3, 109.0, 49.8, 22.4.

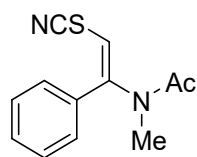

**(E)-N-methyl-N-(1-phenyl-2-thiocyanatovinyl)acetamide (3au).** 83.7 mg (90%); Brown solid; mp 100-102 °C (lit.<sup>2</sup> 102-104 °C); <sup>1</sup>H NMR (400MHz, CDCl<sub>3</sub>) δ 7.49-7.47 (m, 3H), 7.31-7.28 (m, 2H), 6.27 (s, 1H), 3.03 (s, 3H), 2.13 (s, 3H). <sup>13</sup>C NMR (100 MHz, CDCl<sub>3</sub>) δ 170.5, 147.6, 132.5, 130.6, 129.3, 128.0, 110.5, 109.6, 35.6, 22.2.

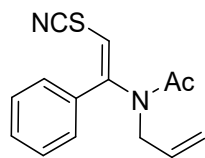

**(E)-N-allyl-N-(1-phenyl-2-thiocyanatovinyl)acetamide (3av).** 68.0 mg (66%); White solid; mp 60-62 °C (lit.<sup>2</sup> 59-61 °C); <sup>1</sup>H NMR (400MHz, CDCl<sub>3</sub>) δ 7.49-7.46 (m, 3H), 7.30-7.27 (m, 2H), 6.24 (s, 1H), 5.84-5.74 (m, 1H), 5.18 (dq, *J* = 10.2, 1.2 Hz, 1H), 5.05 (dq, *J* = 17.1, 1.4 Hz, 1H), 4.02 (dt, *J* = 6.4, 1.3 Hz, 2H), 2.15 (s, 3H). <sup>13</sup>C NMR (100 MHz, CDCl<sub>3</sub>) δ 169.9, 145.9, 132.6, 132.2, 130.6, 129.2, 128.1, 118.8, 111.6, 109.6, 49.7, 22.4.

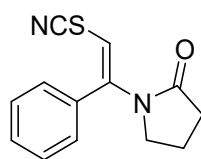

**(E)-1-(1-phenyl-2-thiocyanatovinyl)pyrrolidin-2-one (3aw).** 73.2 mg (75%); Yellow solid; mp 52-54 °C;  $^1\text{H NMR}$  (400MHz,  $\text{CDCl}_3$ )  $\delta$  7.47-7.44 (m, 3H), 7.25-7.23 (m, 2H), 6.88 (s, 1H), 3.35 (t,  $J = 7.1$  Hz, 2H), 2.56 (t,  $J = 8.1$  Hz, 2H), 2.01 (p,  $J = 7.6$  Hz, 2H).  $^{13}\text{C NMR}$  (100 MHz,  $\text{CDCl}_3$ )  $\delta$  174.6, 143.8, 132.8, 129.7, 128.9, 128.3, 111.1, 101.7, 49.2, 32.1, 18.0. **HRMS (ESI) m/z:**  $[\text{M}+\text{H}]^+$  Calcd for  $\text{C}_{13}\text{H}_{13}\text{N}_2\text{OS}^+$  245.0743; Found 245.0745.

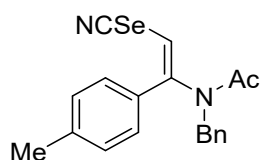

**(E)-N-benzyl-N-(2-selenocyanato-1-(p-tolyl)vinyl)acetamide (5aa).** 102.7 mg (70%); White solid; mp. 108-110 °C  $^1\text{H NMR}$  (400MHz,  $\text{CDCl}_3$ )  $\delta$  7.33-7.26 (m, 5H), 7.18-7.15 (m, 2H), 7.05-7.03 (m, 2H), 6.20 (s, 1H), 4.57 (s, 2H), 2.41 (s, 3H), 2.20 (s, 3H).  $^{13}\text{C NMR}$  (100 MHz,  $\text{CDCl}_3$ )  $\delta$  170.3, 145.4, 141.3, 136.6, 130.7, 130.2, 128.6, 128.5, 127.7, 127.4, 110.2, 100.4, 49.8, 22.4, 21.4. **HRMS (ESI) m/z:**  $[\text{M}+\text{H}]^+$  Calcd for  $\text{C}_{19}\text{H}_{19}\text{N}_2\text{OSe}^+$  371.0657; Found 371.0657.

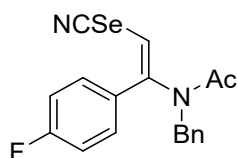

**(E)-N-benzyl-N-(1-(4-fluorophenyl)-2-selenocyanatovinyl)acetamide (5ab).** 95.9 mg (64%); Yellow solid; mp 53-55 °C;  $^1\text{H NMR}$  (400MHz,  $\text{CDCl}_3$ )  $\delta$  7.33-7.28 (m, 3H), 7.17-7.13 (m, 6H), 6.27 (s, 1H), 4.57 (s, 2H), 2.21 (s, 3H).  $^{13}\text{C NMR}$  (100 MHz,  $\text{CDCl}_3$ )  $\delta$  170.2, 163.7 (d,  $J = 251.5$

Hz), 144.7, 136.3, 129.8 (d,  $J = 8.6$ Hz), 128.7, 128.6, 127.8, 116.8 (d,  $J = 22.0$  Hz), 110.8, 99.9, 93.0, 49.9, 22.4.  $^{19}\text{F}$  NMR (376 MHz,  $\text{CDCl}_3$ )  $\delta$  -107.73. HRMS (ESI)  $m/z$ :  $[\text{M}+\text{H}]^+$  Calcd for  $\text{C}_{18}\text{H}_{16}\text{FN}_2\text{OSe}^+$  375.0406; Found 375.0407.

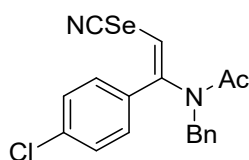

**(E)-N-benzyl-N-(1-(4-chlorophenyl)-2-selenocyanatovinyl)acetamide (5ac).** 65.4 mg (42%); Yellow solid; mp 103-105 °C;  $^1\text{H}$  NMR (400MHz,  $\text{CDCl}_3$ )  $\delta$  7.46-7.44 (m, 2H), 7.34-7.29 (m, 3H), 7.16-7.13 (m, 2H), 7.11-7.08 (m, 2H), 6.29 (s, 1H), 4.58 (s, 2H), 2.20 (s, 3H).  $^{13}\text{C}$  NMR (100 MHz,  $\text{CDCl}_3$ )  $\delta$  170.1, 144.7, 137.0, 136.3, 132.2, 129.9, 129.0, 128.7, 128.6, 127.9, 111.3, 99.8, 50.0, 22.5. HRMS (ESI)  $m/z$ :  $[\text{M}+\text{H}]^+$  Calcd for  $\text{C}_{18}\text{H}_{16}\text{ClN}_2\text{OSe}^+$  391.0111; Found 391.0115.

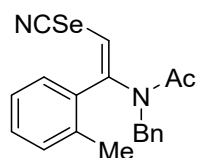

**(E)-N-benzyl-N-(2-selenocyanato-1-(o-tolyl)vinyl)acetamide (5ad).** 140.5 mg (95%); White solid; mp 85-87 °C;  $^1\text{H}$  NMR (400MHz,  $\text{CDCl}_3$ )  $\delta$  7.39-7.35 (m, 1H), 7.32-7.21 (m, 5H), 7.09-7.07 (m, 2H), 6.98 (d,  $J = 8.0$  Hz, 1H), 6.43 (s, 1H), 4.51 (s, 2H), 2.36 (s, 3H), 2.21 (s, 3H).  $^{13}\text{C}$  NMR (100 MHz,  $\text{CDCl}_3$ )  $\delta$  170.4, 145.5, 136.7, 136.6, 132.6, 131.8, 130.7, 129.5, 128.6, 127.5, 127.4, 126.6, 109.5, 100.4, 49.5, 22.8, 19.4. HRMS (ESI)  $m/z$ :  $[\text{M}+\text{H}]^+$  Calcd for  $\text{C}_{19}\text{H}_{19}\text{N}_2\text{OSe}^+$  371.0657; Found 371.0653.

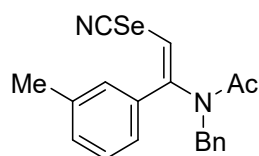

**(E)-N-benzyl-N-(2-selenocyanato-1-(*m*-tolyl)vinyl)acetamide (5ae).**

111.0 mg (75%); White solid; mp 80-82 °C; <sup>1</sup>H NMR (400MHz, CDCl<sub>3</sub>) δ 7.38-7.28 (m, 5H), 7.19-7.16 (m, 2H), 6.94-6.92 (m, 2H), 6.25 (s, 1H), 4.58 (s, 2H), 2.39 (s, 3H), 2.21 (s, 3H). <sup>13</sup>C NMR (100 MHz, CDCl<sub>3</sub>) δ 170.2, 145.4, 139.7, 136.6, 133.7, 131.6, 129.4, 128.6, 128.5, 127.8, 127.7, 124.7, 111.0, 100.4, 49.9, 22.4, 21.4. HRMS (ESI) m/z: [M+H]<sup>+</sup> Calcd for C<sub>19</sub>H<sub>19</sub>N<sub>2</sub>OSe<sup>+</sup> 371.0657; Found 371.0655.

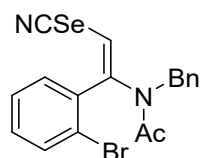

**(E)-N-benzyl-N-(1-(2-bromophenyl)-2-selenocyanatovinyl)acetamide**

**(5af).** 160.5 mg (92%); yellow solid; mp 106-108 °C; <sup>1</sup>H NMR (400MHz, CDCl<sub>3</sub>) δ 7.66 (dd, *J* = 7.6, 1.6 Hz, 1H), 7.38-7.32 (m, 2H), 7.31-7.26 (m, 3H), 7.15-7.13 (m, 2H), 7.11 (dd, *J* = 7.3, 2.1 Hz, 1H), 6.49 (s, 1H), 4.57 (s, 2H), 2.35 (s, 3H). <sup>13</sup>C NMR (100 MHz, CDCl<sub>3</sub>) δ 170.6, 146.3, 136.5, 134.2, 134.0, 131.9, 131.2, 128.5, 128.0, 127.8, 127.5, 122.8, 110.4, 100.3, 50.2, 22.8. HRMS (ESI) m/z: [M+H]<sup>+</sup> Calcd for C<sub>18</sub>H<sub>16</sub>BrN<sub>2</sub>OSe<sup>+</sup> 434.9606; Found 434.9608.

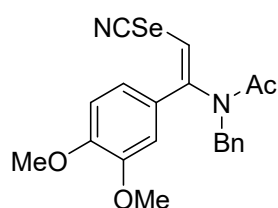

**(E)-N-benzyl-N-(1-(3,4-dimethoxyphenyl)-2-**

**(selenocyanatovinyl)acetamide (5ag).** 154.9 mg (93%); Yellow solid; mp 140-142 °C; <sup>1</sup>H NMR (400MHz, CDCl<sub>3</sub>) δ 7.34-7.29 (m, 3H), 7.21-7.19 (m, 2H), 6.90 (d, *J* = 8.3 Hz, 1H), 6.69 (dd, *J* = 8.2, 2.2 Hz, 1H), 6.50 (d, *J* = 2.1 Hz, 1H), 6.23 (s, 1H), 4.64 (s, 2H), 3.93 (s, 3H), 3.79 (s, 3H), 2.17 (s, 3H). <sup>13</sup>C NMR (100 MHz, CDCl<sub>3</sub>) δ 170.4, 151.0, 149.9, 145.4, 136.7, 128.8, 128.6, 127.8, 126.5, 120.9, 111.2, 109.6, 109.5, 100.6, 56.0, 56.0, 50.4, 22.6. HRMS (ESI) *m/z*: [M+H]<sup>+</sup> Calcd for C<sub>20</sub>H<sub>21</sub>N<sub>2</sub>O<sub>3</sub>Se<sup>+</sup> 417.0712; Found 417.0716.

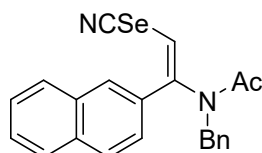

**(E)-N-benzyl-N-(1-(naphthalen-2-yl)-2-selenocyanatovinyl)acetamide**

**(5ah).** 78.7 mg (49%); Yellow oil; <sup>1</sup>H NMR (400MHz, CDCl<sub>3</sub>) δ 7.95 (d, *J* = 8.6 Hz, 1H), 7.92-7.89 (m, 1H), 7.86-7.84 (m, 1H), 7.62-7.59 (m, 2H), 7.57 (s, 1H), 7.33-7.30 (m, 3H), 7.26-7.23 (m, 1H), 7.20-7.17 (m, 2H), 6.36 (s, 1H), 4.63 (s, 2H), 2.27 (s, 3H). <sup>13</sup>C NMR (100 MHz, CDCl<sub>3</sub>) δ 170.4, 145.4, 136.6, 134.0, 132.9, 131.2, 129.9, 128.7, 128.3, 128.0 (2C), 127.9, 127.8, 127.4, 123.6, 111.5, 100.3, 92.0, 50.1, 22.6. HRMS (ESI) *m/z*: [M+H]<sup>+</sup> Calcd for C<sub>22</sub>H<sub>19</sub>N<sub>2</sub>OSe<sup>+</sup> 407.0657; Found 407.0655.

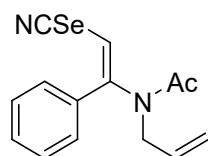

**(E)-N-allyl-N-(1-phenyl-2-selenocyanatovinyl)acetamide (5ai).** 37.0 mg (30%); Yellow solid; mp 52-54 °C;  $^1\text{H NMR}$  (400MHz,  $\text{CDCl}_3$ )  $\delta$  7.49-7.48 (m, 3H), 7.23-7.20 (m, 2H), 6.56 (s, 1H), 5.85-5.75 (m, 1H), 5.18 (dd,  $J = 10.1, 1.5$  Hz, 1H), 5.05 (dd,  $J = 17.1, 1.7$  Hz, 1H), 4.03 (dt,  $J = 6.3, 1.2$  Hz, 2H), 2.16 (s, 3H).  $^{13}\text{C NMR}$  (100 MHz,  $\text{CDCl}_3$ )  $\delta$  170.0, 145.7, 134.1, 132.4, 130.7, 129.5, 127.5, 118.7, 110.4, 100.4, 49.7, 22.4. **HRMS (ESI) m/z:**  $[\text{M}+\text{H}]^+$  Calcd for  $\text{C}_{14}\text{H}_{15}\text{N}_2\text{OSe}^+$  307.0344; Found 307.0347.

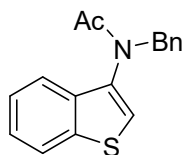

**Preparation of product 6 from 3al:** To a mixture of  $\text{Pd}(\text{OAc})_2$  (5.6 mg, 0.025 mmol, 5 mol%),  $\text{PPh}_3$  (13.1 mg, 0.05 mmol, 10 mol%), and  $\text{Cs}_2\text{CO}_3$  (325.8 mg, 1 mmol, 2 equiv.) was added a solution of **3al** (193.6 mg, 0.5 mmol) in 2 mL DMF under nitrogen atmosphere. After stirring at 100 °C overnight, the reaction mixture was quenched with water, extracted with EtOAc, washed with brine. The combined organic layers were dried over anhydrous  $\text{Na}_2\text{SO}_4$  and evaporated in vacuo. The residue was purified by column chromatography over silica gel (petroleum ether/EtOAc, 10:1). The product of **6** was isolated as yellow oil in 50% (70.9 mg) yield.

**N-(benzo[*b*]thiophen-3-yl)-N-benzylacetamide (6)**<sup>[2]</sup>.  $^1\text{H NMR}$  (400MHz,  $\text{CDCl}_3$ )  $\delta$  7.86-7.82 (m, 1H), 7.53-7.49 (m, 1H), 7.42-7.38 (m, 2H), 7.26-7.20 (m, 5H), 6.93 (s, 1H), 5.51 (d,  $J = 14.1$  Hz, 1H), 4.27 (d,  $J = 14.1$  Hz, 1H), 1.89 (s, 3H).  $^{13}\text{C NMR}$  (100 MHz,  $\text{CDCl}_3$ )  $\delta$  171.1, 138.6,



137.6, 135.1, 134.8, 128.9, 128.3, 127.5, 125.2, 124.9, 124.2, 123.3, 120.7, 51.4, 22.0.

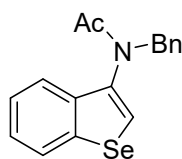

***N*-(benzo[*b*]selenophen-3-yl)-*N*-benzylacetamide (7).** Following the procedure described above for the preparation of **6** from **3aI**, product **7** was obtained as brown oil in 46% (75.7 mg) yield; **<sup>1</sup>H NMR (400MHz, CDCl<sub>3</sub>)** δ 7.89 (d, *J* = 8.0 Hz, 1H), 7.51 (d, *J* = 7.7 Hz, 1H), 7.43-7.34 (m, 3H), 7.26-7.20 (m, 5H), 5.55 (d, *J* = 14.1 Hz, 1H), 4.17 (d, *J* = 14.1 Hz, 1H), 1.88 (s, 3H). **<sup>13</sup>C NMR (100 MHz, CDCl<sub>3</sub>)** δ 171.0, 139.4, 137.7, 137.4, 136.6, 129.0, 128.3, 127.4, 127.2, 126.3, 125.5, 125.1, 122.7, 51.0, 21.9. **HRMS (ESI) m/z:** [M+H]<sup>+</sup> Calcd for C<sub>17</sub>H<sub>16</sub>NOSe<sup>+</sup> 330.0392; Found 330.0396.

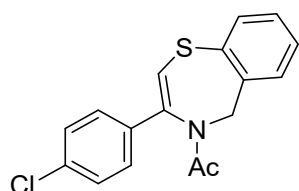

**Preparation of product 8 from 3at:** To a mixture of Pd(OAc)<sub>2</sub> (5.6 mg, 0.025 mmol, 5 mol%), PPh<sub>3</sub> (13.1 mg, 0.05 mmol, 10 mol%), and Cs<sub>2</sub>CO<sub>3</sub> (325.8 mg, 1 mmol, 2 equiv.) was added a solution of **3at** (209.5 mg, 0.5 mmol) in 2 mL DMF under nitrogen atmosphere. After stirring at 100 °C overnight, the reaction mixture was quenched with water, extracted with EtOAc, washed with brine. The combined organic layers were dried over

anhydrous Na<sub>2</sub>SO<sub>4</sub> and evaporated in vacuo. The residue was purified by column chromatography over silica gel (petroleum ether/EtOAc, 10:1). The product **8** was isolated as yellow solid in 35% yield (55.1 mg);

**1-(3-(4-chlorophenyl)benzo[f][1,4]thiazepin-4(5H)-yl)ethan-1-one**

**(8)**<sup>[2]</sup>. <sup>1</sup>H NMR (400MHz, CDCl<sub>3</sub>) δ 7.48-7.46 (m, 1H), 7.35-7.32 (m, 2H), 7.29-7.26 (m, 3H), 7.21-7.17 (m, 2H), 6.06 (s, 1H), 4.82 (s, 2H), 1.63 (s, 3H). <sup>13</sup>C NMR (100 MHz, CDCl<sub>3</sub>) δ 170.7, 140.3, 138.4, 137.6, 133.7, 132.3, 131.4, 129.3, 127.8, 127.7, 126.2, 125.7, 114.5, 53.1, 23.9.

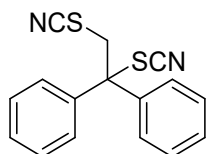

In 15 mL three-necked round bottom flask with carbon plate anode (10 mm × 10 mm × 0.3 mm), iron plate cathode (10 mm × 10 mm × 0.3 mm), a mixture of enamides (**1a**, 100 mg, 0.4 mmol), NH<sub>4</sub>SCN (**2a**, 122 mg, 1.6 mmol, 4 equiv.), LiBF<sub>4</sub> (113 mg, 3 equiv.), DPE (216 mg, 1.2 mmol, 3 equiv.) in CH<sub>3</sub>CN/HOAc (6 mL, 3:1) was stirred with constant current of 20 mA at room temperature for 3 h (monitored by TLC). Upon completion of the reaction, the mixture was diluted with EtOAc. The solvent was then removed under vacuo. The residue was purified by column chromatography over silica gel (petroleum ether/EtOAc, 3:1). The adduct product **9** of DPE and SCN radical was isolated as yellow oil in 35% yield. Trace amount of corresponding **3aa** was detected.

**(1,2-dithiocyanatoethane-1,1-diyl)dibenzene (9)**<sup>[3]</sup>. <sup>1</sup>H NMR (400MHz, CDCl<sub>3</sub>) δ 7.43-7.35 (m, 6H), 7.33-7.30 (m, 4H), 4.00 (s, 2H). <sup>13</sup>C NMR (100 MHz, CDCl<sub>3</sub>) δ 139.9, 129.0, 129.0, 126.0, 111.1, 72.0, 46.4.

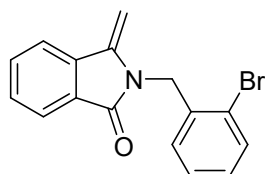

**2-(2-bromobenzyl)-3-methyleneisoindolin-1-one (10)**. White solid; mp 106-108 °C (lit.<sup>4</sup> 110 °C); <sup>1</sup>H NMR (400MHz, CDCl<sub>3</sub>) δ 7.90 (d, *J* = 7.5 Hz, 1H), 7.70 (d, *J* = 7.6 Hz, 1H), 7.63-7.60 (m, 1H), 7.58-7.52 (m, 2H), 7.18 (t, *J* = 7.4 Hz, 1H), 7.11 (t, *J* = 7.1 Hz, 1H), 6.95 (d, *J* = 7.6 Hz, 1H), 5.17 (d, *J* = 2.5 Hz, 1H), 5.07 (s, 2H), 4.72 (d, *J* = 2.5 Hz, 1H). <sup>13</sup>C NMR (100 MHz, CDCl<sub>3</sub>) δ 167.2, 141.2, 136.2, 135.3, 132.7, 132.2, 129.6, 129.0, 128.7, 127.6, 127.5, 123.4, 122.3, 120.0, 90.3, 43.1.

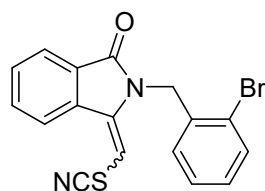

**2-(2-bromobenzyl)-3-(thiocyanatomethylene)isoindolin-1-one (11)**. 51.5mg (35%, *E:Z*=10:1); White solid; mp 140-142 °C; <sup>1</sup>H NMR (400MHz, CDCl<sub>3</sub>) δ 8.39 (d, *J* = 7.8 Hz, 1H<sub>(E)</sub>), 7.99-7.97 (m, 1H<sub>(E)</sub>), 7.93 (d, *J* = 7.5 Hz, 0.14H<sub>(Z)</sub>), 7.76-7.72 (m, 1H<sub>(E)</sub>), 7.69-7.65 (m, 1.28 H<sub>(E+Z)</sub>), 7.63-7.60 (m, 1.14 H<sub>(E+Z)</sub>), 7.25-7.21 (m, 1.28 H<sub>(E+Z)</sub>), 7.18-7.14 (m, 1.14 H<sub>(E+Z)</sub>), 6.94-6.92 (m, 1H<sub>(E)</sub>), 6.75 (d, *J* = 2 Hz, 0.14H<sub>(Z)</sub>), 6.05 (s, 0.14H<sub>(Z)</sub>), 5.70 (s, 1H<sub>(E)</sub>), 5.32 (s, 0.28H<sub>(Z)</sub>), 5.08 (s, 2H<sub>(E)</sub>). <sup>13</sup>C NMR (100 MHz,

**CDCl<sub>3</sub>**  $\delta$  ***E* isomer**: 166.3, 144.0, 133.9, 133.6, 133.2, 133.0, 131.2, 129.7, 129.3, 128.0, 127.4, 125.2, 124.3, 122.2, 109.6, 88.1, 43.3; ***Z* isomer**: 167.6, 141.2, 135.9, 134.9, 133.1, 130.8, 129.2, 127.1, 125.9, 124.0, 122.1, 120.0, 85.7, 45.0. **HRMS (ESI) m/z**: [M+H]<sup>+</sup> Calcd for C<sub>17</sub>H<sub>12</sub>BrN<sub>2</sub>OS<sup>+</sup> 370.9848; Found 370.9847.

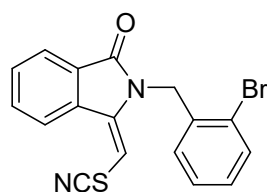

**(*E*)-2-(2-bromobenzyl)-3-(thiocyanatomethylene)isoindolin-1-one (*E* isomer of 11)**. White solid; mp 140-142 °C; <sup>1</sup>H NMR (400MHz, CDCl<sub>3</sub>)  $\delta$  8.39 (d, *J* = 8.0 Hz, 1H), 7.99-7.97 (m, 1H), 7.77-7.72 (m, 1H), 7.69-7.65 (m, 1H), 7.62-7.59 (m, 1H), 7.25-7.14 (m, 2H), 6.93 (dd, *J* = 7.6, 1.8 Hz, 1H), 5.70 (s, 1H), 5.08 (s, 2H). <sup>13</sup>C NMR (100 MHz, CDCl<sub>3</sub>)  $\delta$  166.3, 144.0, 133.9, 133.6, 133.2, 133.0, 131.2, 129.7, 129.3, 128.0, 127.4, 125.2, 124.3, 122.2, 109.6, 88.1, 43.3. **HRMS (ESI) m/z**: [M+H]<sup>+</sup> Calcd for C<sub>17</sub>H<sub>12</sub>BrN<sub>2</sub>OS<sup>+</sup> 370.9848; Found 370.9847.

### 3. Current efficiency of reaction with representative substrates

Current efficiency (c.e.) is the percentage value that specifies the ratio of Coulombs consumed in forming the chemical products to the total number of Coulombs passed through the cell. It is calculated in the following formula:

$$c.e. = \frac{z * N_p * F}{I * t} \times 100\%$$

$z$ : the number of electrons added to or removed from one product molecule [-];  $N_p$ : number of mols of the product [mol];  $F$ : Faraday constant [96485 s·A·mol<sup>-1</sup>];  $I$ : the current [A];  $t$ : the time [s].

For product **3aa** in Table 2,

$$c.e. = \frac{2 * 3.5 \times 10^{-4} \text{ mol} * 96485 \text{ s} \cdot \text{A} \cdot \text{mol}^{-1}}{2 \times 10^{-2} \text{ A} * 10800 \text{ s}} \times 100\% = 31\%$$

For product **5ai** in Table 3,

$$c.e. = \frac{2 * 1.2 \times 10^{-4} \text{ mol} * 96485 \text{ s} \cdot \text{A} \cdot \text{mol}^{-1}}{2 \times 10^{-2} \text{ A} * 10800 \text{ s}} \times 100\% = 11\%$$

#### 4. Procedure for cyclic voltammetry (CV)

Cyclic voltammetry was performed in a three-electrode cell at room temperature. The working electrode was a steady glassy carbon disk electrode while the counter electrode was a platinum wire. The reference was an Ag/AgCl electrode submerged in saturated aqueous KCl solution. 0.1 M LiBF<sub>4</sub> and related compounds (0.01 M) in MeCN was poured into the electrochemical cell in cyclic voltammetry experiments. The scan rate was 0.10 V/s, ranging from 0 V to 3 V.

#### 5. Gram-Scale synthesis of 3aa

Following the general procedure described, the reaction was carried out at gram-scale in an oven-dried round-bottom flask (250 mL) equipped with carbon plate (3 cm × 3 cm × 0.3 mm) as the anode, iron plate (3 cm × 3 cm × 0.3 mm) as the cathode. A mixture of enamides (**1a**, 5 mmol, 1.26 g), NH<sub>4</sub>SCN (**2a** 1.52 g, 4 equiv.), LiBF<sub>4</sub> (1.41 g, 3 equiv.) in CH<sub>3</sub>CN/HOAc

(80 mL, 3:1) was stirred with constant current of 40 mA at room temperature for 24 h (monitored by TLC). After it was cooled down to room temperature, the mixture was poured into water (100 mL) and was extracted with EtOAc (3 x 100 mL). The combined organic layers were washed with brine (2 x 50 mL) and dried over MgSO<sub>4</sub>. The solvent was removed by vacuum and the residue was purified by column chromatography (20% EtOAc in PE) to give the corresponding products **3aa** in 76% yield.

## 6. X-ray Crystallographic Data of *E*-isomer of **11**

**Sample preparation:** Single crystals of *E*-isomer of **11** for X-ray diffraction experiment was obtained by slow evaporation of DCM/n-hexane (1:10, v/v) solution containing *E*-isomer of **11**. CCDC 2167617 contain the supplementary crystallographic data for this paper, these data can be obtained free of charge from the Cambridge Crystallographic Data Center.

**Figure S1. ORTEP Structure of *E*-isomer of **11** (CCDC 2167617)**

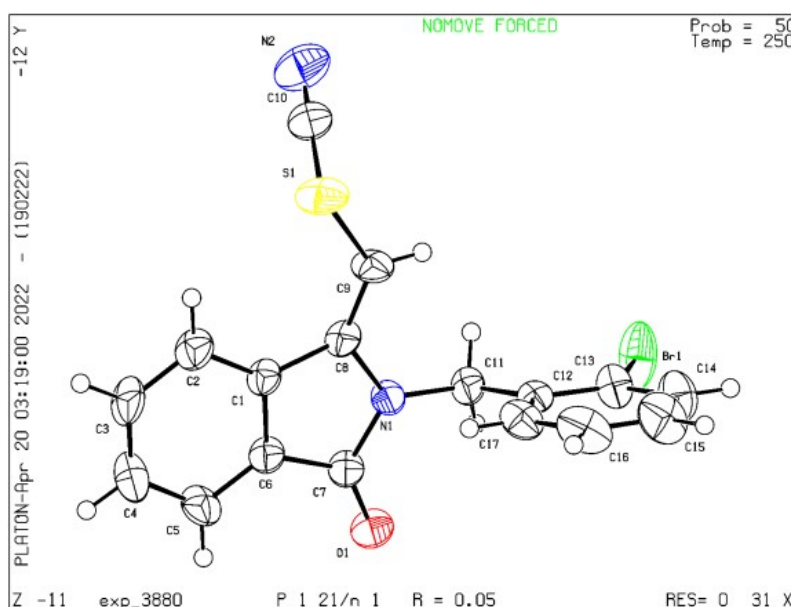

**Table S1 Crystal data and structure refinement for *E*-isomer of 11 (CCDC 2167617).**

|                                             |                                                               |
|---------------------------------------------|---------------------------------------------------------------|
| Identification code                         | exp_3880                                                      |
| Empirical formula                           | C <sub>17</sub> H <sub>11</sub> BrN <sub>2</sub> OS           |
| Formula weight                              | 371.25                                                        |
| Temperature/K                               | 249.97(10)                                                    |
| Crystal system                              | monoclinic                                                    |
| Space group                                 | P2 <sub>1</sub> /n                                            |
| a/Å                                         | 12.8390(12)                                                   |
| b/Å                                         | 9.1349(11)                                                    |
| c/Å                                         | 13.4055(16)                                                   |
| α/°                                         | 90                                                            |
| β/°                                         | 99.269(11)                                                    |
| γ/°                                         | 90                                                            |
| Volume/Å <sup>3</sup>                       | 1551.7(3)                                                     |
| Z                                           | 4                                                             |
| ρ <sub>calc</sub> /g/cm <sup>3</sup>        | 1.589                                                         |
| μ/mm <sup>-1</sup>                          | 2.786                                                         |
| F(000)                                      | 744.0                                                         |
| Crystal size/mm <sup>3</sup>                | 0.15 × 0.11 × 0.09                                            |
| Radiation                                   | Mo Kα (λ = 0.71073)                                           |
| 2θ range for data collection/°              | 4.796 to 49.998                                               |
| Index ranges                                | -15 ≤ h ≤ 15, -10 ≤ k ≤ 8, -11 ≤ l ≤ 15                       |
| Reflections collected                       | 6587                                                          |
| Independent reflections                     | 2726 [R <sub>int</sub> = 0.0524, R <sub>sigma</sub> = 0.0766] |
| Data/restraints/parameters                  | 2726/0/200                                                    |
| Goodness-of-fit on F <sup>2</sup>           | 0.991                                                         |
| Final R indexes [I ≥ 2σ (I)]                | R <sub>1</sub> = 0.0524, wR <sub>2</sub> = 0.1072             |
| Final R indexes [all data]                  | R <sub>1</sub> = 0.0876, wR <sub>2</sub> = 0.1260             |
| Largest diff. peak/hole / e Å <sup>-3</sup> | 0.52/-0.69                                                    |

**Crystal structure determination of *E*-isomer of 11 (CCDC 2167617).**

**Crystal Data** for C<sub>17</sub>H<sub>11</sub>BrN<sub>2</sub>OS (*M* = 371.25 g/mol): monoclinic, space group P2<sub>1</sub>/n (no. 14), *a* = 12.8390(12) Å, *b* = 9.1349(11) Å, *c* = 13.4055(16) Å, β = 99.269(11)°, *V* = 1551.7(3) Å<sup>3</sup>, *Z* = 4, *T* = 249.97(10) K, μ(Mo Kα) = 2.786 mm<sup>-1</sup>, *D*<sub>calc</sub> = 1.589 g/cm<sup>3</sup>, 6587 reflections measured (4.796° ≤ 2θ ≤ 49.998°), 2726 unique (*R*<sub>int</sub> = 0.0524, *R*<sub>sigma</sub> = 0.0766) which were used in all calculations. The final *R*<sub>1</sub> was 0.0524 (*I* > 2σ(*I*)) and *wR*<sub>2</sub> was 0.1260 (all data).

**Refinement model description**

**Table S2 Fractional Atomic Coordinates (×10<sup>4</sup>) and Equivalent Isotropic Displacement Parameters (Å<sup>2</sup>×10<sup>3</sup>) for *E*-isomer of 11 (CCDC 2167617). U<sub>eq</sub> is defined as 1/3 of the trace of the orthogonalised U<sub>ij</sub> tensor.**

| Atom | <i>x</i>   | <i>y</i>   | <i>z</i>  | U(eq)   |
|------|------------|------------|-----------|---------|
| Br1  | 10139.8(4) | 5883.3(6)  | 2308.2(5) | 74.0(3) |
| S1   | 6497.2(11) | 7810.1(14) | 5385.1(9) | 56.4(4) |

**Table S2 Fractional Atomic Coordinates ( $\times 10^4$ ) and Equivalent Isotropic Displacement Parameters ( $\text{\AA}^2 \times 10^3$ ) for *E*-isomer of 11 (CCDC 2167617).  $U_{\text{eq}}$  is defined as 1/3 of the trace of the orthogonalised  $U_{\text{ij}}$  tensor.**

| Atom | <i>x</i> | <i>y</i> | <i>z</i> | $U_{\text{eq}}$ |
|------|----------|----------|----------|-----------------|
| O1   | 6114(2)  | 4074(3)  | 1485(2)  | 50.8(8)         |
| N2   | 6809(4)  | 10826(5) | 5089(4)  | 73.8(14)        |
| N1   | 6734(2)  | 5556(4)  | 2842(3)  | 36.3(8)         |
| C1   | 5186(3)  | 5946(4)  | 3457(3)  | 34.8(10)        |
| C2   | 4368(3)  | 6381(5)  | 3948(3)  | 46.8(11)        |
| C3   | 3346(4)  | 5915(5)  | 3554(4)  | 52.9(13)        |
| C4   | 3153(3)  | 5045(6)  | 2714(4)  | 55.8(13)        |
| C5   | 3963(3)  | 4600(5)  | 2223(3)  | 47.4(12)        |
| C6   | 4976(3)  | 5061(5)  | 2601(3)  | 37.2(10)        |
| C7   | 5964(3)  | 4792(5)  | 2210(3)  | 37.1(10)        |
| C8   | 6335(3)  | 6286(4)  | 3627(3)  | 33.7(10)        |
| C9   | 6946(3)  | 7065(5)  | 4325(3)  | 43.2(11)        |
| C10  | 6677(4)  | 9599(6)  | 5181(3)  | 48.2(12)        |
| C11  | 7817(3)  | 5638(4)  | 2656(3)  | 36.5(10)        |
| C12  | 8566(3)  | 4588(4)  | 3288(3)  | 31.4(9)         |
| C13  | 9627(3)  | 4554(5)  | 3214(3)  | 41.0(11)        |
| C14  | 10338(4) | 3622(6)  | 3757(4)  | 59.1(14)        |
| C15  | 9986(4)  | 2650(6)  | 4417(4)  | 64.6(15)        |
| C16  | 8934(4)  | 2636(5)  | 4514(4)  | 61.4(14)        |
| C17  | 8235(4)  | 3590(5)  | 3953(3)  | 45.8(11)        |

**Table S3 Anisotropic Displacement Parameters ( $\text{\AA}^2 \times 10^3$ ) for *E*-isomer of 11 (CCDC 2167617). The Anisotropic displacement factor exponent takes the form:  $-2\pi^2[\text{h}^2\text{a}^2U_{11}+2\text{hka}*\text{b}*\text{U}_{12}+\dots]$ .**

| Atom | $U_{11}$ | $U_{22}$ | $U_{33}$ | $U_{23}$  | $U_{13}$ | $U_{12}$ |
|------|----------|----------|----------|-----------|----------|----------|
| Br1  | 48.2(4)  | 93.0(5)  | 90.1(6)  | 41.5(3)   | 39.1(3)  | 14.2(3)  |
| S1   | 80.0(9)  | 62.2(8)  | 31.9(8)  | -16.0(6)  | 23.6(6)  | -13.4(7) |
| O1   | 54.6(18) | 71(2)    | 29(2)    | -18.9(15) | 11.7(15) | 3.0(16)  |
| N2   | 98(4)    | 70(3)    | 60(4)    | -13(2)    | 32(3)    | 6(3)     |
| N1   | 32.3(18) | 54(2)    | 24(2)    | -11.8(16) | 7.1(15)  | -0.8(17) |
| C1   | 36(2)    | 43(2)    | 28(3)    | -1.5(19)  | 10.5(19) | 3.9(19)  |
| C2   | 46(3)    | 58(3)    | 39(3)    | -6(2)     | 15(2)    | 5(2)     |
| C3   | 38(3)    | 75(4)    | 51(4)    | -3(3)     | 24(2)    | 11(2)    |
| C4   | 32(2)    | 81(4)    | 53(4)    | 4(3)      | 4(2)     | 2(2)     |
| C5   | 42(2)    | 69(3)    | 29(3)    | -8(2)     | -3(2)    | -3(2)    |
| C6   | 38(2)    | 49(3)    | 25(3)    | -5(2)     | 6.5(19)  | 4(2)     |
| C7   | 38(2)    | 51(3)    | 22(3)    | -5(2)     | 3.7(19)  | 4(2)     |
| C8   | 40(2)    | 44(2)    | 20(3)    | -1.1(19)  | 14.8(19) | 2(2)     |
| C9   | 49(2)    | 54(3)    | 29(3)    | -16(2)    | 13(2)    | -10(2)   |
| C10  | 58(3)    | 60(3)    | 28(3)    | -12(2)    | 11(2)    | 1(3)     |



**Table S3 Anisotropic Displacement Parameters ( $\text{\AA}^2 \times 10^3$ ) for *E*-isomer of 11 (CCDC 2167617). The Anisotropic displacement factor exponent takes the form:  $-2\pi^2[h^2a^{*2}U_{11}+2hka^*b^*U_{12}+\dots]$ .**

| Atom | $U_{11}$ | $U_{22}$ | $U_{33}$ | $U_{23}$ | $U_{13}$ | $U_{12}$ |
|------|----------|----------|----------|----------|----------|----------|
| C11  | 33(2)    | 52(3)    | 26(3)    | -4(2)    | 9.5(19)  | 2(2)     |
| C12  | 37(2)    | 42(2)    | 15(2)    | -4.4(18) | 6.1(18)  | -2(2)    |
| C13  | 37(2)    | 58(3)    | 29(3)    | 9(2)     | 8(2)     | 0(2)     |
| C14  | 44(3)    | 74(3)    | 54(4)    | 10(3)    | -9(2)    | 9(3)     |
| C15  | 68(3)    | 72(4)    | 45(4)    | 21(3)    | -17(3)   | 4(3)     |
| C16  | 80(4)    | 68(3)    | 32(3)    | 16(2)    | -3(3)    | -16(3)   |
| C17  | 49(3)    | 60(3)    | 27(3)    | -1(2)    | 4(2)     | -9(2)    |

**Table S4 Bond Lengths for *E*-isomer of 11 (CCDC 2167617).**

| Atom | Atom | Length/ $\text{\AA}$ | Atom | Atom | Length/ $\text{\AA}$ |
|------|------|----------------------|------|------|----------------------|
| Br1  | C13  | 1.908(4)             | C3   | C4   | 1.368(7)             |
| S1   | C9   | 1.754(4)             | C4   | C5   | 1.378(6)             |
| S1   | C10  | 1.679(6)             | C5   | C6   | 1.383(5)             |
| O1   | C7   | 1.214(5)             | C6   | C7   | 1.470(5)             |
| N2   | C10  | 1.143(5)             | C8   | C9   | 1.327(5)             |
| N1   | C7   | 1.383(5)             | C11  | C12  | 1.517(5)             |
| N1   | C8   | 1.409(5)             | C12  | C13  | 1.382(5)             |
| N1   | C11  | 1.454(5)             | C12  | C17  | 1.389(6)             |
| C1   | C2   | 1.384(5)             | C13  | C14  | 1.369(6)             |
| C1   | C6   | 1.394(6)             | C14  | C15  | 1.379(7)             |
| C1   | C8   | 1.489(5)             | C15  | C16  | 1.378(7)             |
| C2   | C3   | 1.400(6)             | C16  | C17  | 1.383(6)             |

**Table S5 Bond Angles for *E*-isomer of 11 (CCDC 2167617).**

| Atom | Atom | Atom | Angle/ $^\circ$ | Atom | Atom | Atom | Angle/ $^\circ$ |
|------|------|------|-----------------|------|------|------|-----------------|
| C10  | S1   | C9   | 100.0(2)        | N1   | C8   | C1   | 104.9(3)        |
| C7   | N1   | C8   | 112.8(3)        | C9   | C8   | N1   | 122.4(4)        |
| C7   | N1   | C11  | 121.9(3)        | C9   | C8   | C1   | 132.7(4)        |
| C8   | N1   | C11  | 125.2(3)        | C8   | C9   | S1   | 123.1(3)        |
| C2   | C1   | C6   | 119.8(4)        | N2   | C10  | S1   | 176.8(5)        |
| C2   | C1   | C8   | 132.6(4)        | N1   | C11  | C12  | 114.2(3)        |
| C6   | C1   | C8   | 107.6(3)        | C13  | C12  | C11  | 121.2(3)        |
| C1   | C2   | C3   | 118.1(4)        | C13  | C12  | C17  | 116.0(4)        |
| C4   | C3   | C2   | 121.5(4)        | C17  | C12  | C11  | 122.8(4)        |
| C3   | C4   | C5   | 120.9(4)        | C12  | C13  | Br1  | 118.5(3)        |
| C4   | C5   | C6   | 118.2(4)        | C14  | C13  | Br1  | 117.8(3)        |
| C1   | C6   | C7   | 109.1(3)        | C14  | C13  | C12  | 123.8(4)        |
| C5   | C6   | C1   | 121.6(4)        | C13  | C14  | C15  | 118.9(4)        |

**Table S5 Bond Angles for *E*-isomer of 11 (CCDC 2167617).**

| Atom | Atom | Atom | Angle/°  | Atom | Atom | Atom | Angle/°  |
|------|------|------|----------|------|------|------|----------|
| C5   | C6   | C7   | 129.3(4) | C16  | C15  | C14  | 119.6(5) |
| O1   | C7   | N1   | 125.1(4) | C15  | C16  | C17  | 120.2(5) |
| O1   | C7   | C6   | 129.3(4) | C16  | C17  | C12  | 121.6(4) |
| N1   | C7   | C6   | 105.7(3) |      |      |      |          |

**Table S6 Torsion Angles for *E*-isomer of 11 (CCDC 2167617).**

| A   | B   | C   | D   | Angle/°   | A   | B   | C   | D   | Angle/°   |
|-----|-----|-----|-----|-----------|-----|-----|-----|-----|-----------|
| Br1 | C13 | C14 | C15 | 180.0(4)  | C7  | N1  | C11 | C12 | -99.9(5)  |
| N1  | C8  | C9  | S1  | -172.7(3) | C8  | N1  | C7  | O1  | -179.7(4) |
| N1  | C11 | C12 | C13 | -178.7(4) | C8  | N1  | C7  | C6  | 1.0(5)    |
| N1  | C11 | C12 | C17 | 2.8(6)    | C8  | N1  | C11 | C12 | 83.8(5)   |
| C1  | C2  | C3  | C4  | 0.4(7)    | C8  | C1  | C2  | C3  | 176.5(4)  |
| C1  | C6  | C7  | O1  | 179.6(5)  | C8  | C1  | C6  | C5  | -177.6(4) |
| C1  | C6  | C7  | N1  | -1.1(5)   | C8  | C1  | C6  | C7  | 0.8(5)    |
| C1  | C8  | C9  | S1  | 6.7(7)    | C10 | S1  | C9  | C8  | -118.4(4) |
| C2  | C1  | C6  | C5  | 0.0(7)    | C11 | N1  | C7  | O1  | 3.6(7)    |
| C2  | C1  | C6  | C7  | 178.4(4)  | C11 | N1  | C7  | C6  | -175.7(4) |
| C2  | C1  | C8  | N1  | -177.4(5) | C11 | N1  | C8  | C1  | 176.1(4)  |
| C2  | C1  | C8  | C9  | 3.1(8)    | C11 | N1  | C8  | C9  | -4.4(6)   |
| C2  | C3  | C4  | C5  | -0.1(8)   | C11 | C12 | C13 | Br1 | 1.0(5)    |
| C3  | C4  | C5  | C6  | -0.3(7)   | C11 | C12 | C13 | C14 | -179.3(4) |
| C4  | C5  | C6  | C1  | 0.3(7)    | C11 | C12 | C17 | C16 | 179.4(4)  |
| C4  | C5  | C6  | C7  | -177.7(5) | C12 | C13 | C14 | C15 | 0.3(8)    |
| C5  | C6  | C7  | O1  | -2.1(8)   | C13 | C12 | C17 | C16 | 0.9(7)    |
| C5  | C6  | C7  | N1  | 177.2(4)  | C13 | C14 | C15 | C16 | 0.1(8)    |
| C6  | C1  | C2  | C3  | -0.4(6)   | C14 | C15 | C16 | C17 | 0.0(8)    |
| C6  | C1  | C8  | N1  | -0.2(4)   | C15 | C16 | C17 | C12 | -0.6(8)   |
| C6  | C1  | C8  | C9  | -179.7(5) | C17 | C12 | C13 | Br1 | 179.5(3)  |
| C7  | N1  | C8  | C1  | -0.5(5)   | C17 | C12 | C13 | C14 | -0.8(7)   |
| C7  | N1  | C8  | C9  | 179.0(4)  |     |     |     |     |           |

**Table S7 Hydrogen Atom Coordinates ( $\text{\AA} \times 10^4$ ) and Isotropic Displacement Parameters ( $\text{\AA}^2 \times 10^3$ ) for *E*-isomer of 11 (CCDC 2167617).**

| Atom | x       | y       | z       | U(eq) |
|------|---------|---------|---------|-------|
| H2   | 4494.16 | 6966.84 | 4522.28 | 56    |
| H3   | 2785.91 | 6201.82 | 3871.13 | 63    |
| H4   | 2465.74 | 4750.69 | 2470.27 | 67    |
| H5   | 3831.99 | 4006.16 | 1653.6  | 57    |
| H9   | 7644.05 | 7223.05 | 4249.25 | 52    |
| H11A | 8073.21 | 6629    | 2790.08 | 44    |

**Table S7 Hydrogen Atom Coordinates ( $\text{\AA}\times 10^4$ ) and Isotropic Displacement Parameters ( $\text{\AA}^2\times 10^3$ ) for *E*-isomer of 11 (CCDC 2167617).**

| Atom | <i>x</i> | <i>y</i> | <i>z</i> | U(eq) |
|------|----------|----------|----------|-------|
| H11B | 7825.77  | 5435.48  | 1946.84  | 44    |
| H14  | 11045.17 | 3642.94  | 3682.28  | 71    |
| H15  | 10456.62 | 2008.83  | 4793.94  | 78    |
| H16  | 8693.34  | 1983.72  | 4958.51  | 74    |
| H17  | 7526.34  | 3561.35  | 4022.29  | 55    |

## 7. Reference

- [1]. (a) M. Van den Berg, R. M. Haak, A. J. Minnaard, A. H. M. de Vries, J. G. de Vries and B. L. Feringa, *Adv. Synth. Catal.* **2002**, *344*, 1003-1007; (b) S. Pankajakshan, Y.-H. Xu, J. K. Cheng, M. T. Low and T.-P. Loh, *Angew. Chem. Int. Ed.* **2012**, *51*, 5701-5705; (c) Z.-Y. Shen, J.-K. Cheng, C. Wang, C. Yuan, T.-P. Loh and X.-H. Hu, *ACS Catal.* **2019**, *9*, 8128–8135; (d) X.-J. Dai, M. Liu, J.-Y. Zhang, X.-Y. Xu, W.-C. Yuan and X.-M. Zhang, *Chemistryselect.* **2019**, *4*, 4458–4461;
- [2]. Q. Gu, Q. Wang, W. Dai, X. Wang, Y. Ban, T. Liu, Y. Zhao, Y. Zhang, Y. Ling and X. Zeng,  $\text{K}_2\text{S}_2\text{O}_8$ -mediated regio- and stereo-selective thiocyanation of enamides with  $\text{NH}_4\text{SCN}$ . *Org. Biomol. Chem.* **2021**, *19*, 2512-2516.
- [3]. D. Amrita and H. Alakananda, Potassium Persulfate-Mediated Thiocyanation of 2*H*-Indazole under Iron-Catalysis. *Adv. Synth. Catal.* **2019**, *361*, 842-849.
- [4] C. Sylvain, L. Benoît, M. Christophe and C. Janine. Heck–Suzuki–Miyaura Domino Reactions Involving Ynamides. An Efficient Access to 3-(Arylmethylene)isoindolinones. *Org. Lett.* **2004**, *6*, 2511–2514.

## 8. <sup>1</sup>H NMR and <sup>13</sup>C NMR spectra of compounds 3aa-w, 5aa-i, 6-11

### <sup>1</sup>H NMR spectrum of 3aa

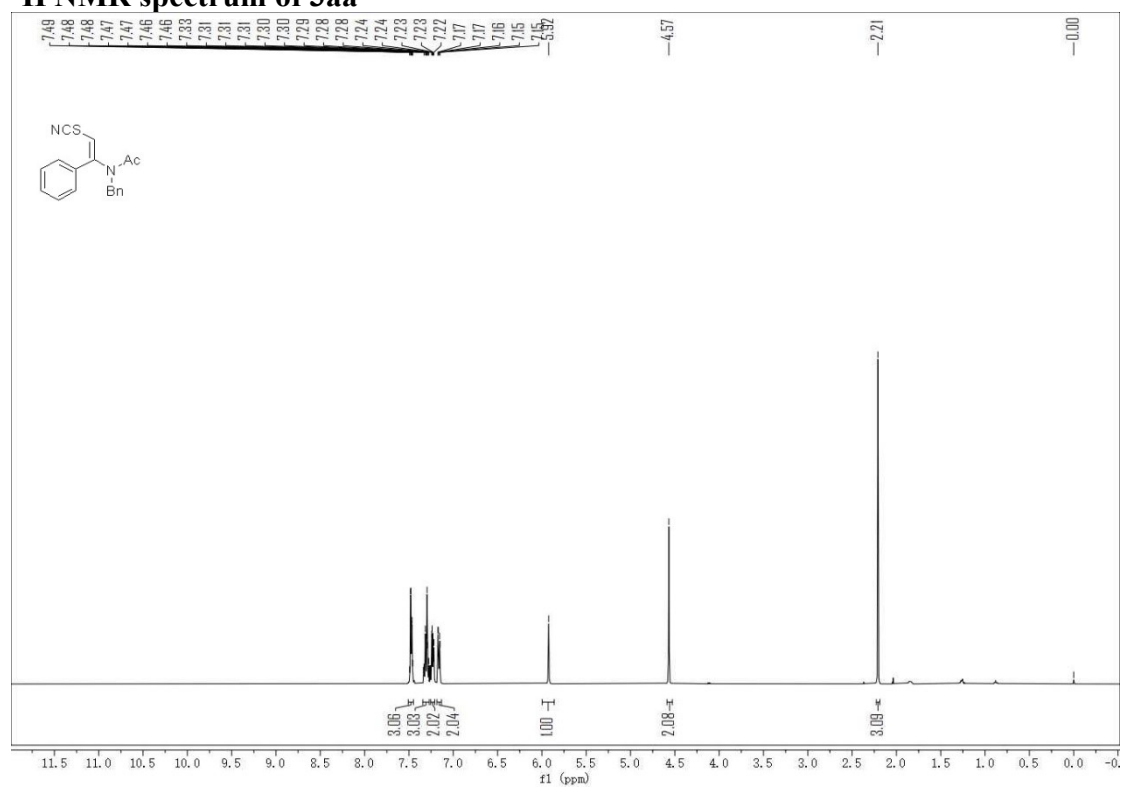

### <sup>13</sup>C NMR spectrum of 3aa

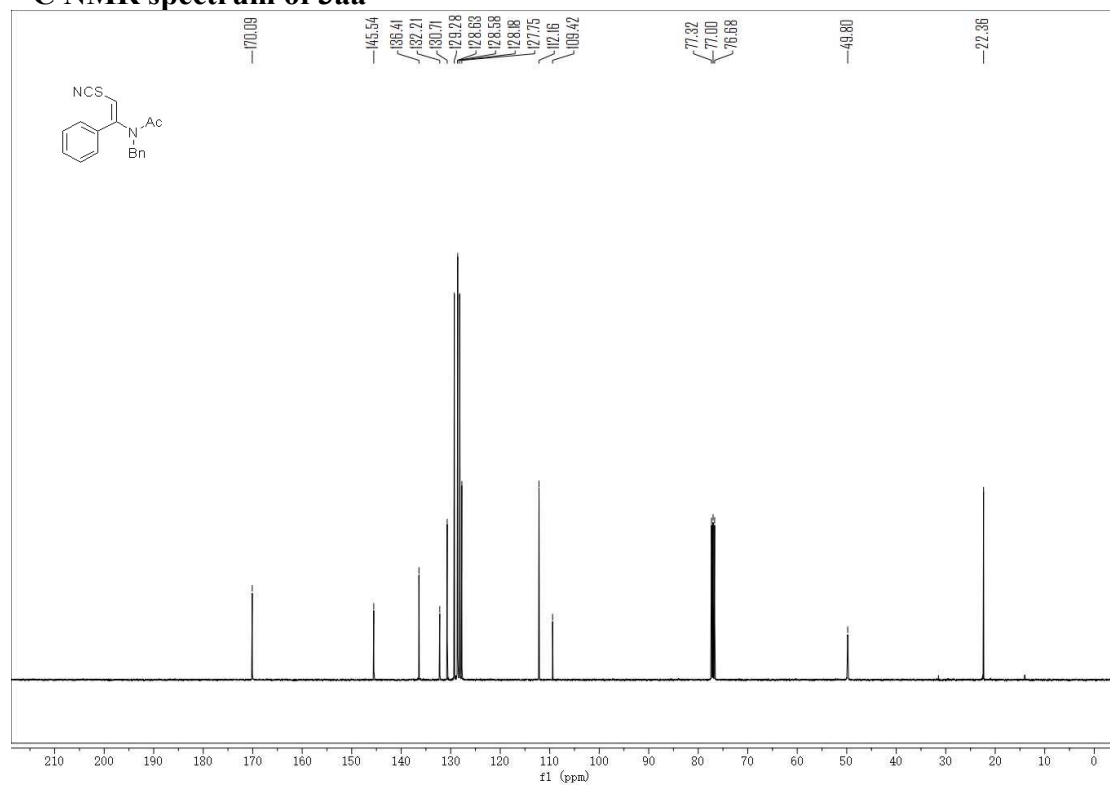

### <sup>1</sup>H NMR spectrum of 3ab

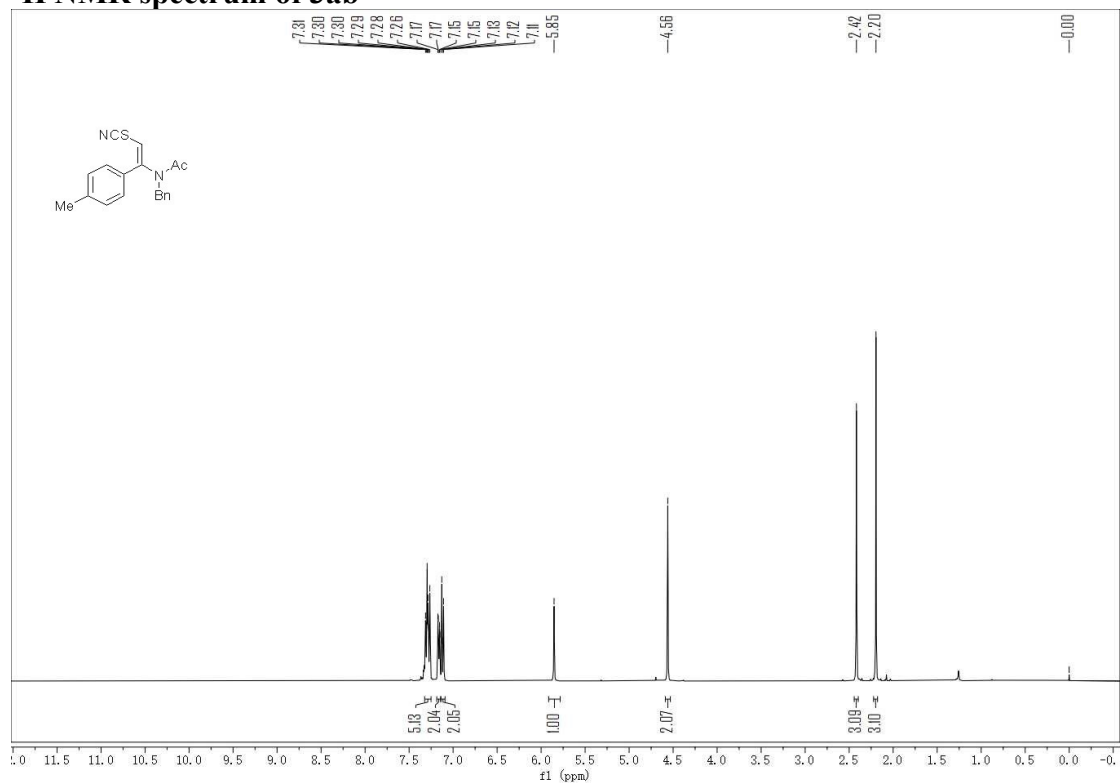

### <sup>13</sup>C NMR spectrum of 3ab

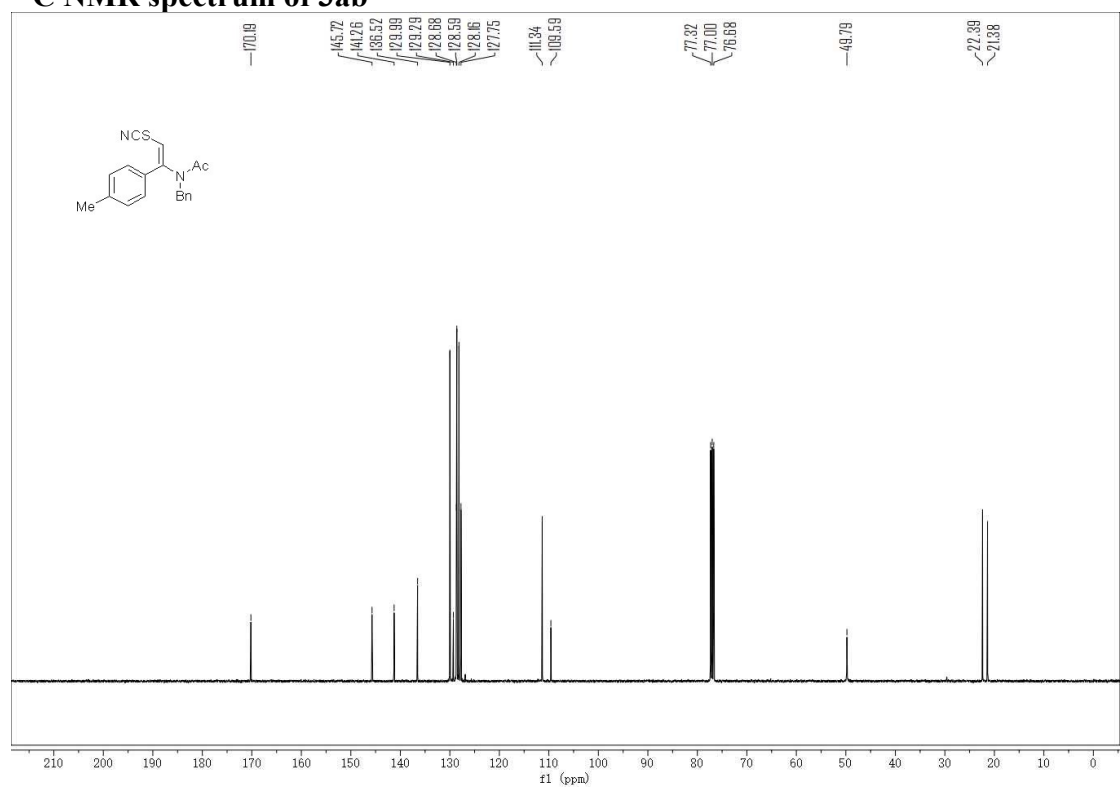

### <sup>1</sup>H NMR spectrum of 3ac

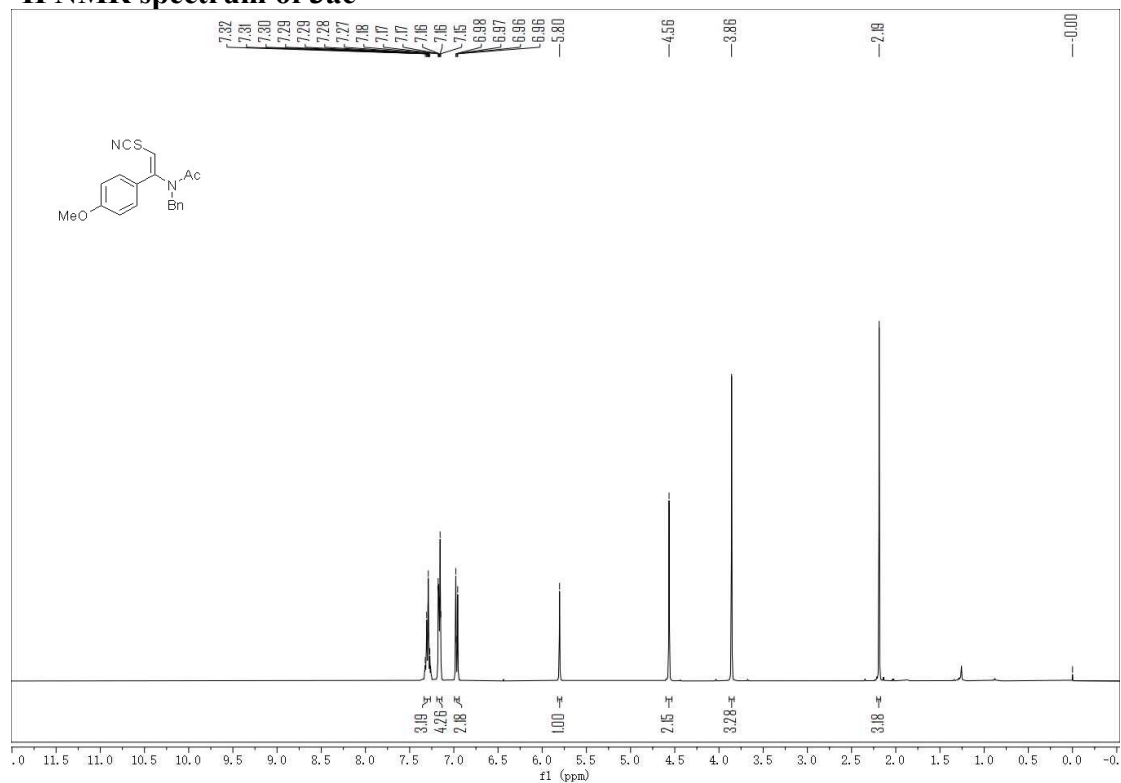

### <sup>13</sup>C NMR spectrum of 3ac

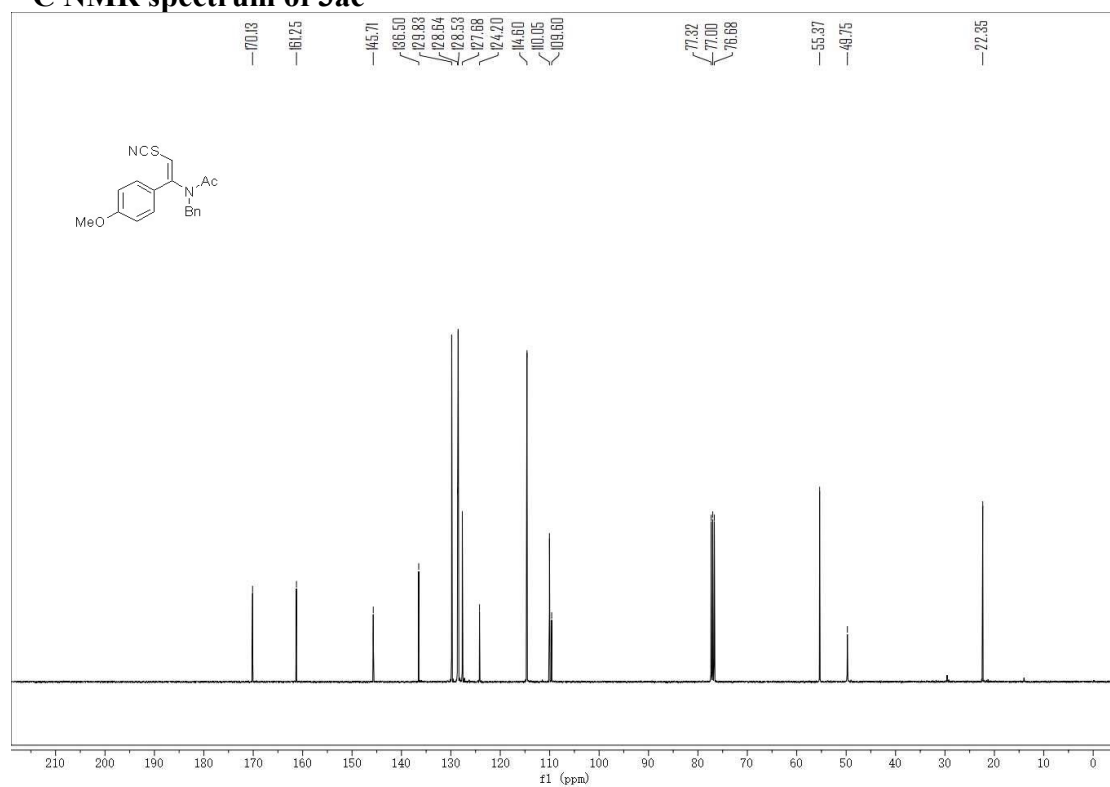

### <sup>1</sup>H NMR spectrum of 3ad

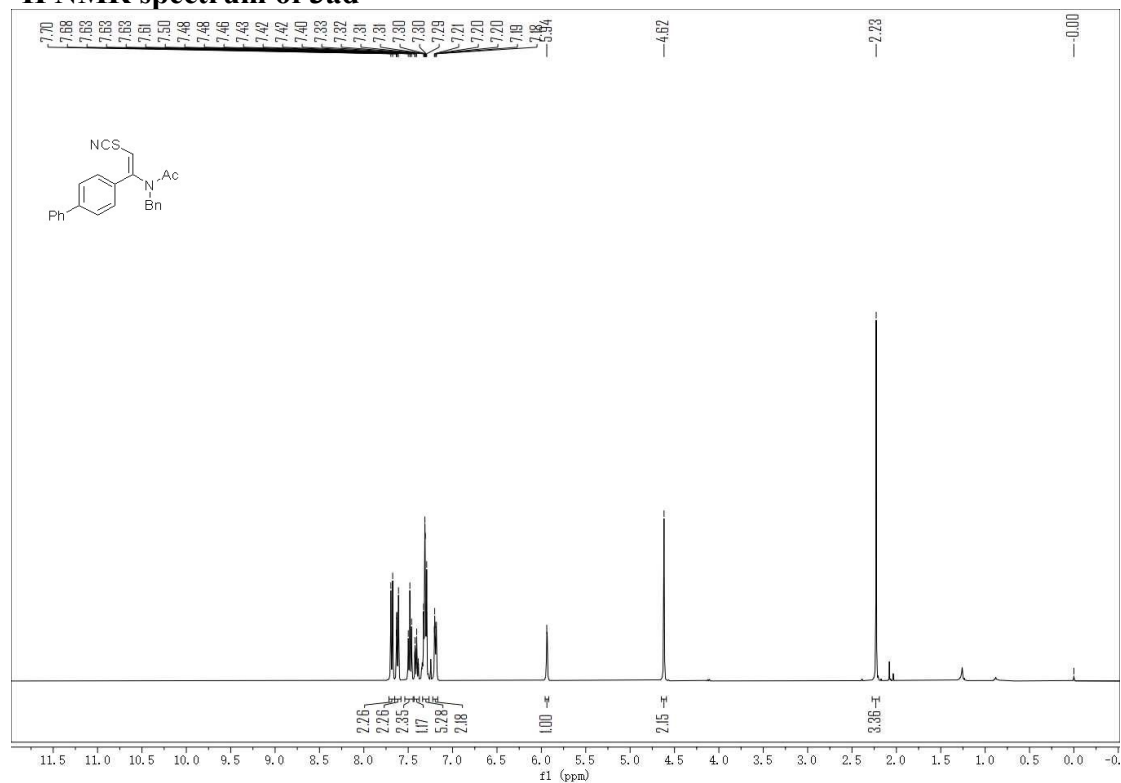

### <sup>13</sup>C NMR spectrum of 3ad

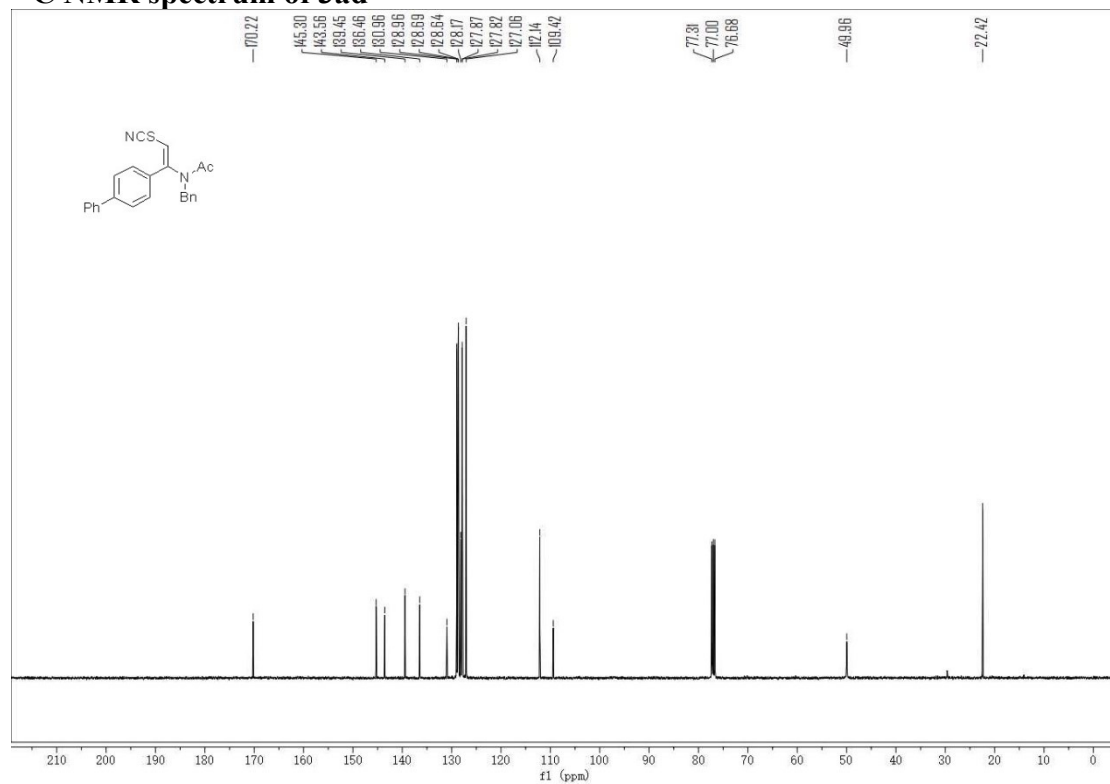

### <sup>1</sup>H NMR spectrum of 3ae

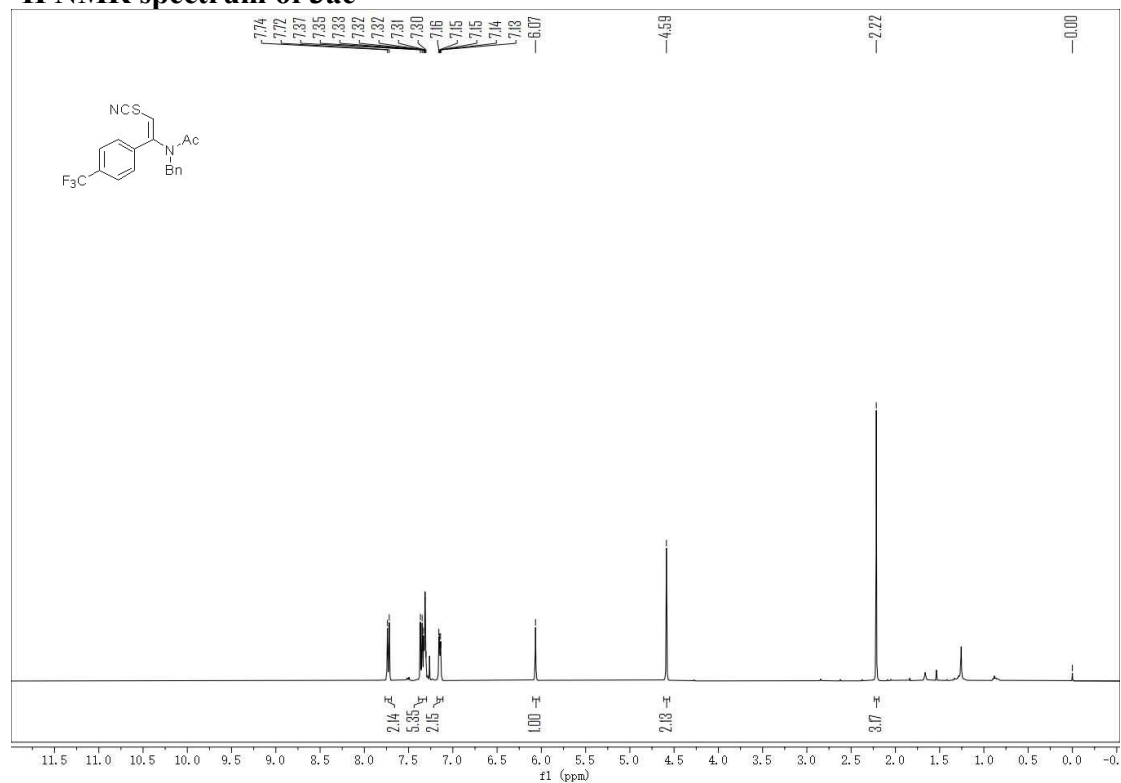

### <sup>13</sup>C NMR spectrum of 3ae

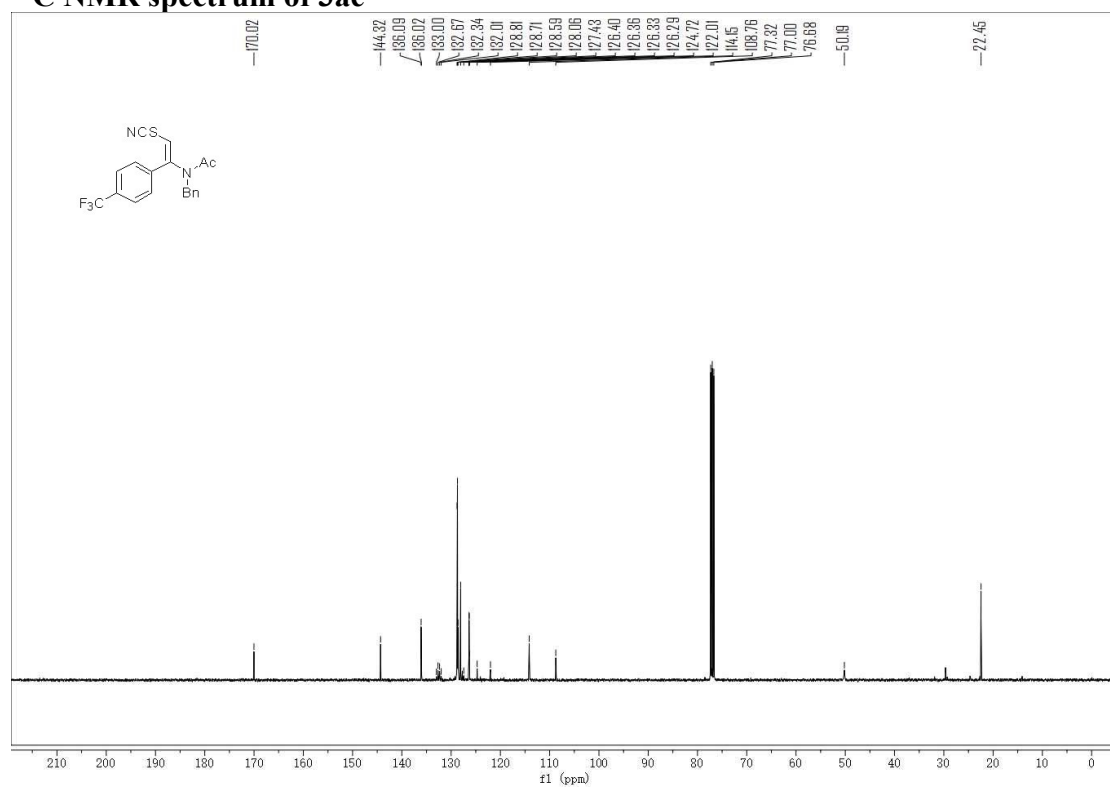



### <sup>19</sup>F NMR spectrum of 3ae

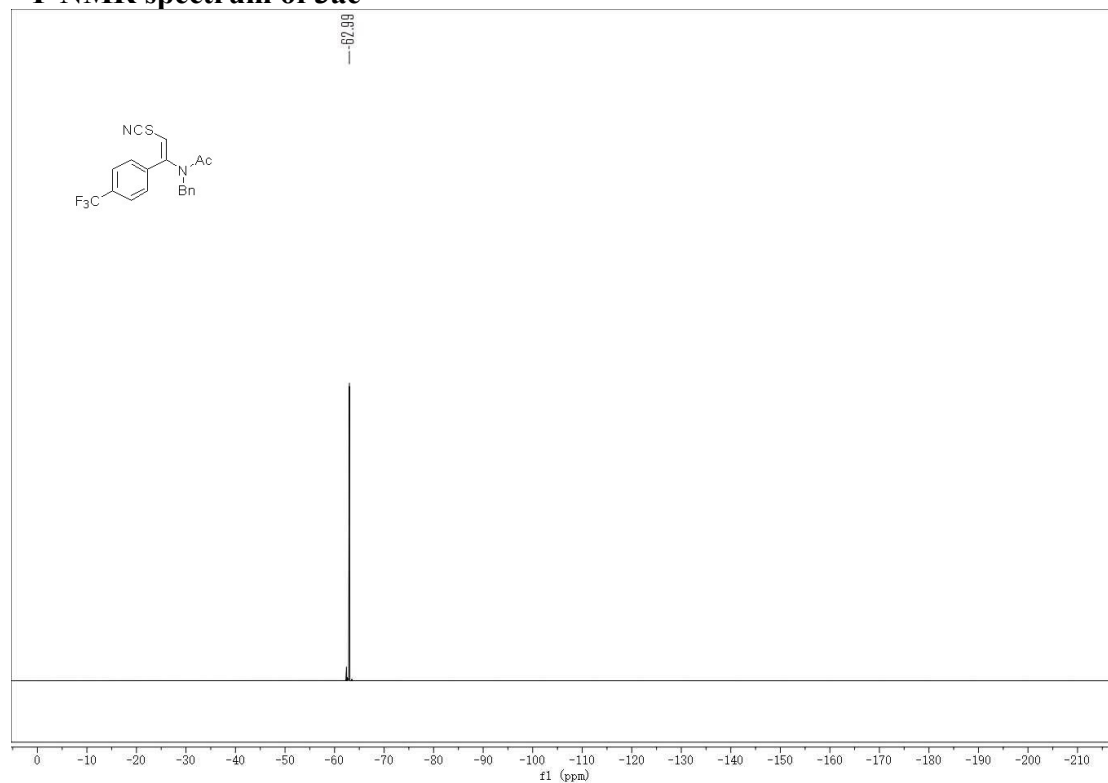

### <sup>1</sup>H NMR spectrum of 3af

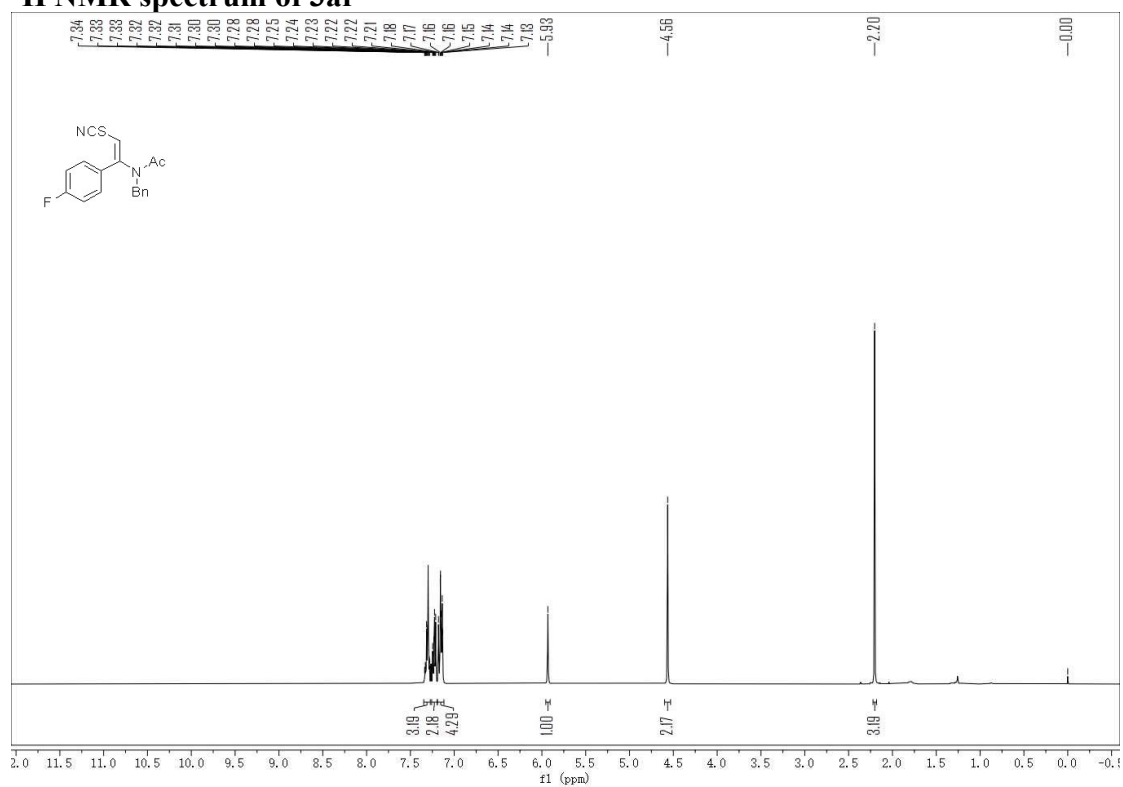

### <sup>13</sup>C NMR spectrum of 3af

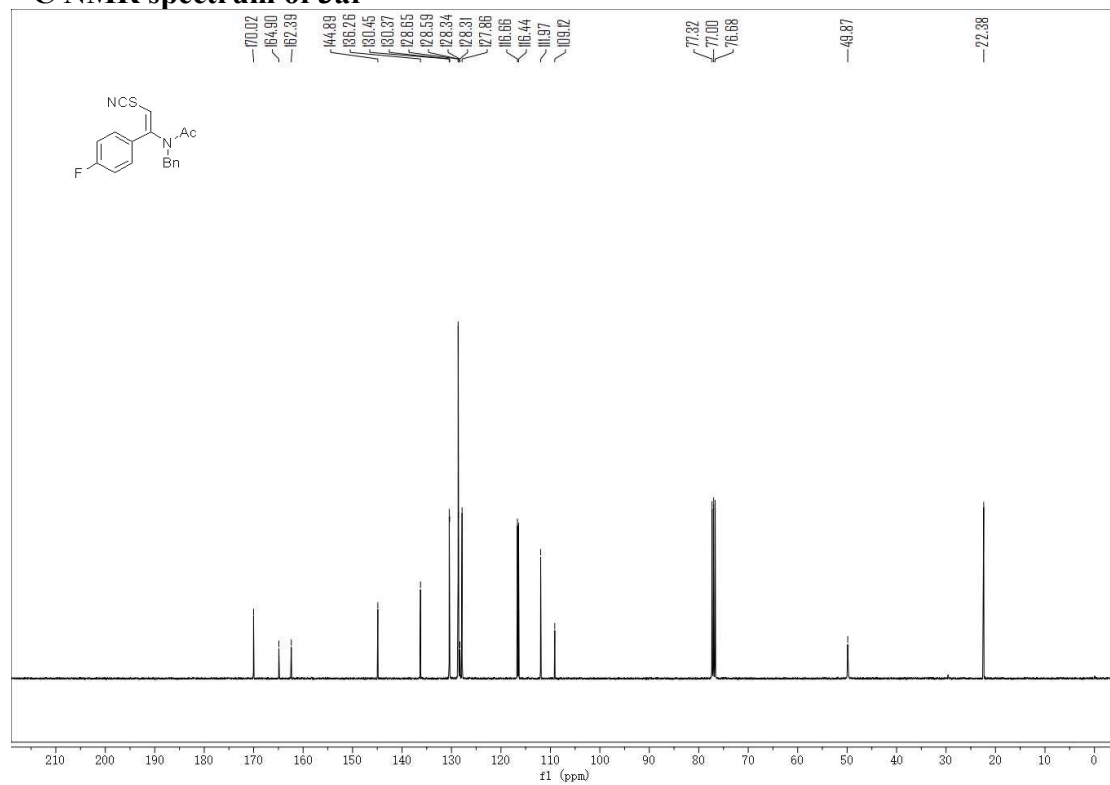

### <sup>19</sup>F NMR spectrum of 3af

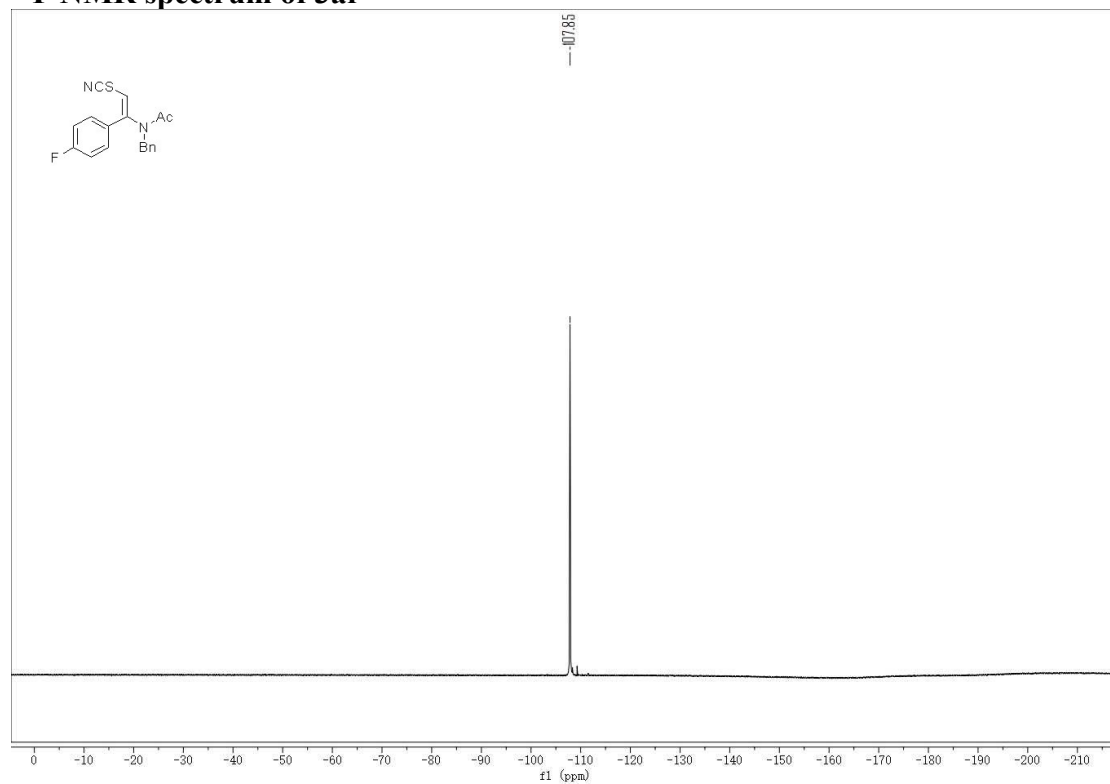

### <sup>1</sup>H NMR spectrum of 3ag

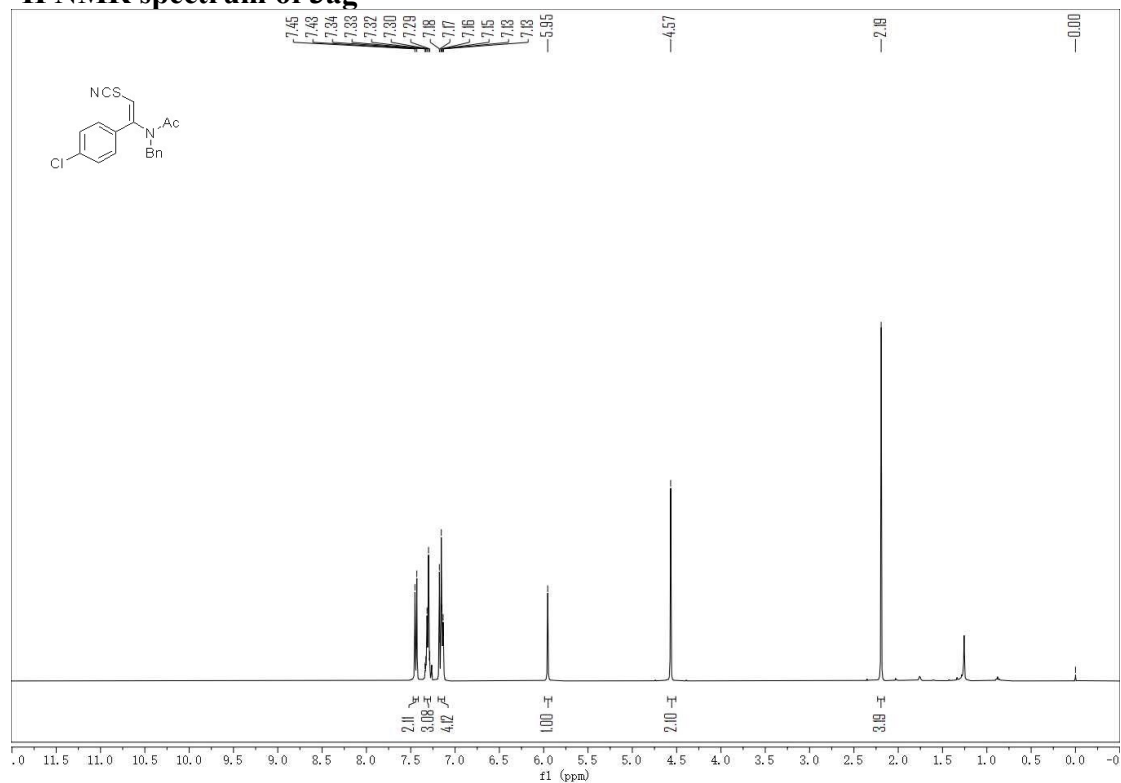

### <sup>13</sup>C NMR spectrum of 3ag

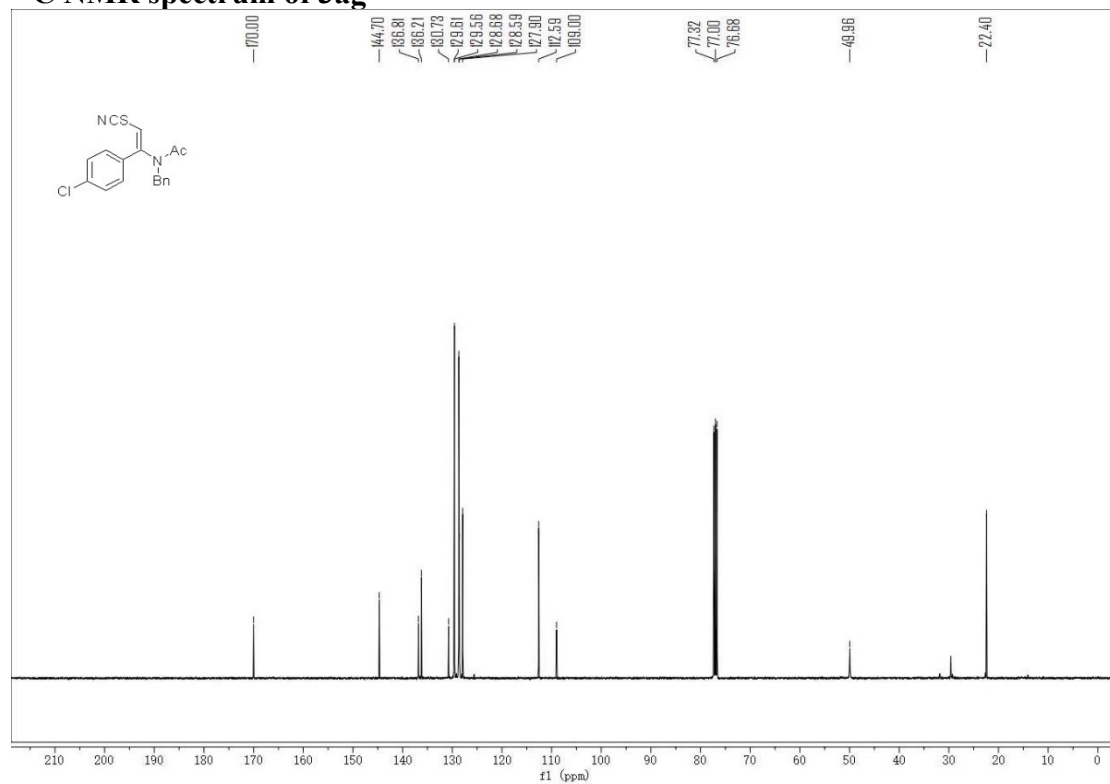

### <sup>1</sup>H NMR spectrum of 3ah

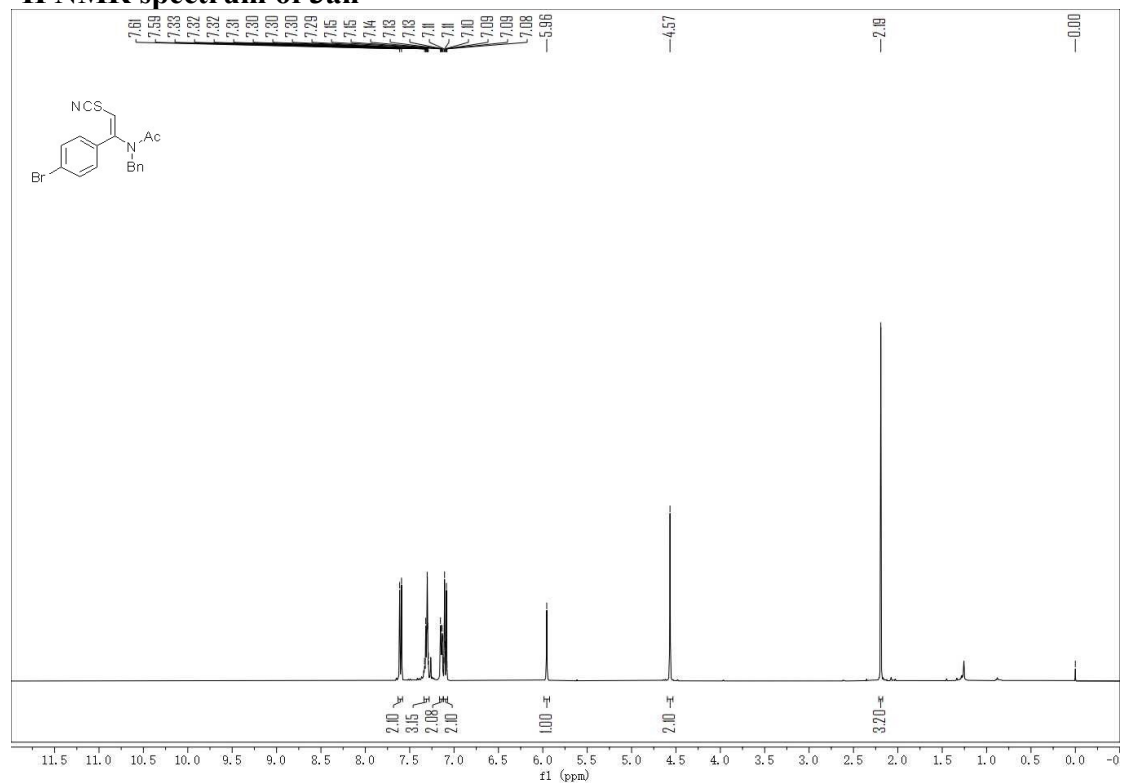

### <sup>13</sup>C NMR spectrum of 3ah

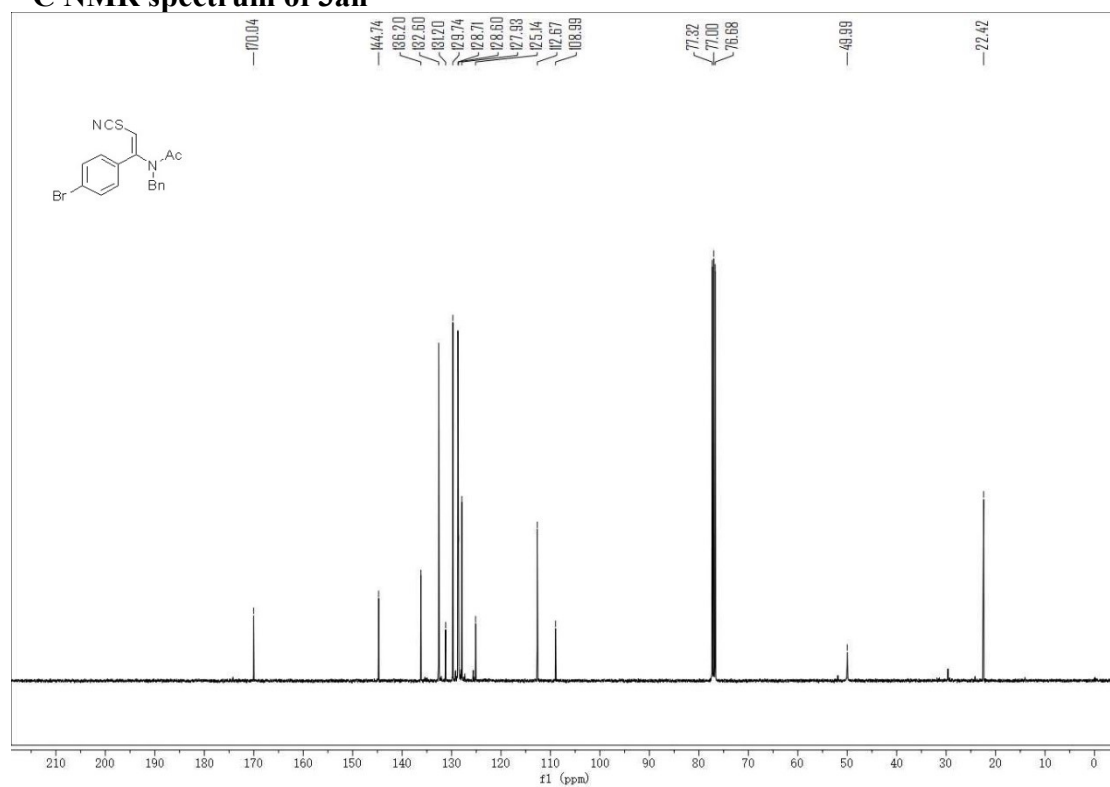

### <sup>1</sup>H NMR spectrum of 3ai

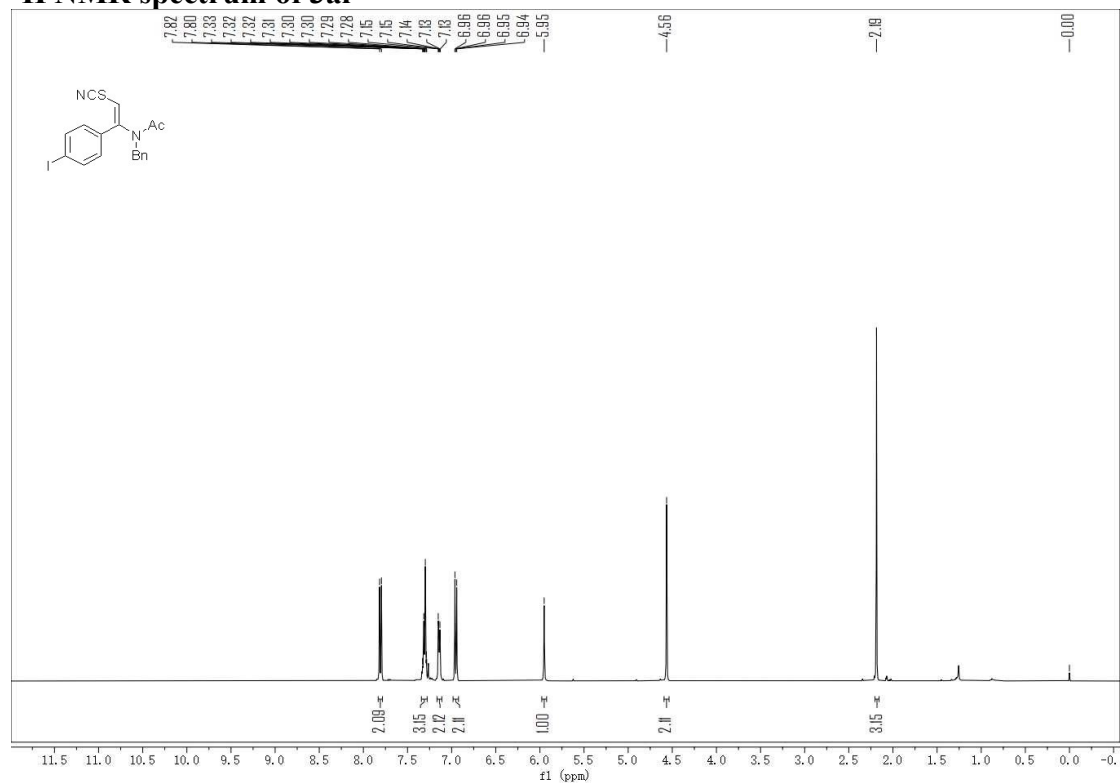

### <sup>13</sup>C NMR spectrum of 3ai

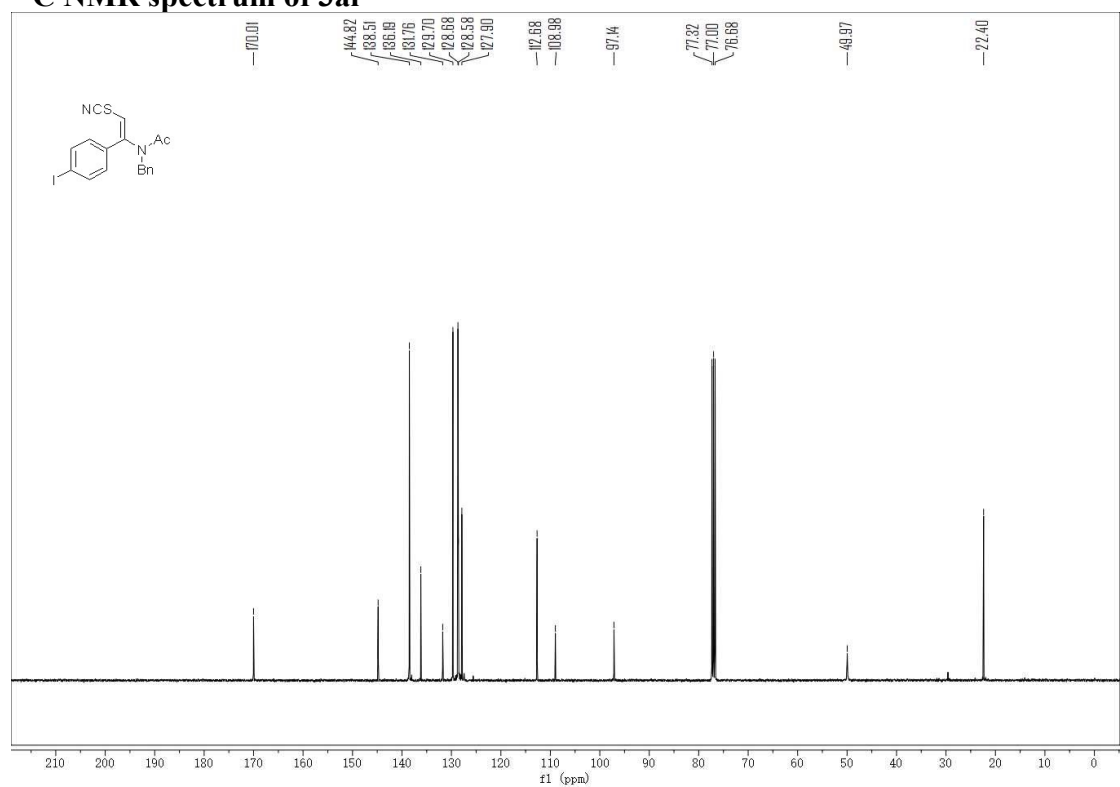

### <sup>1</sup>H NMR spectrum of 3aj

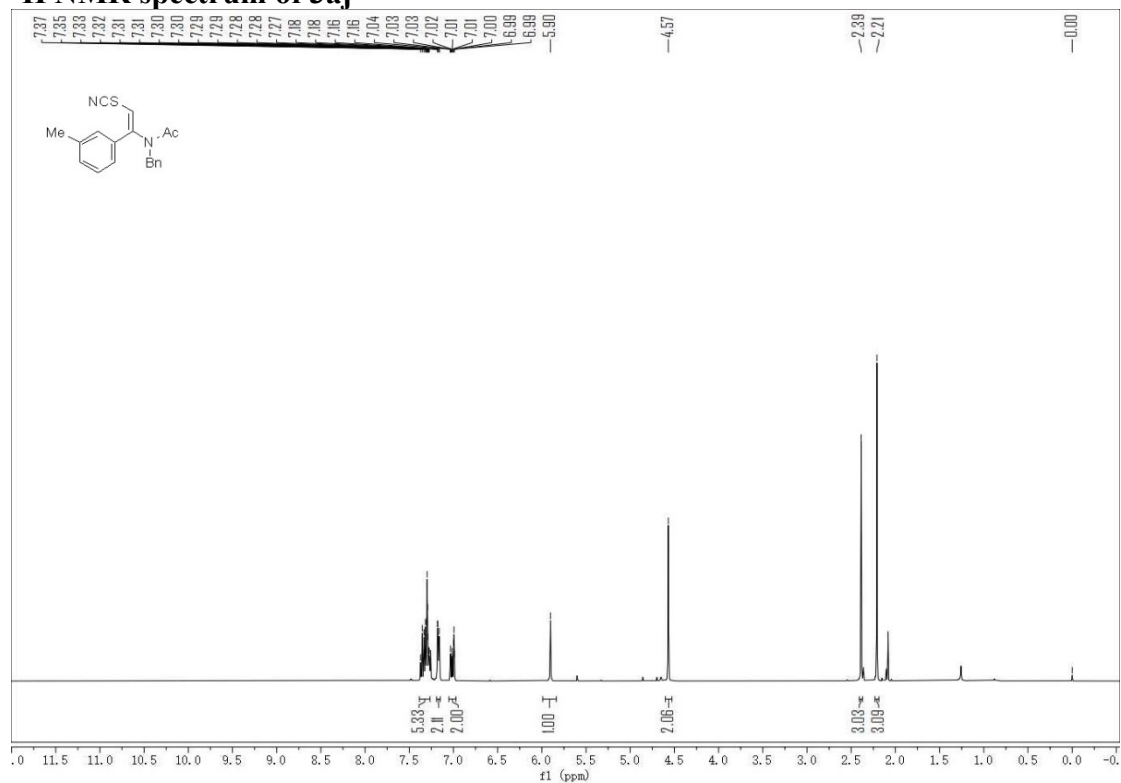

### <sup>13</sup>C NMR spectrum of 3aj

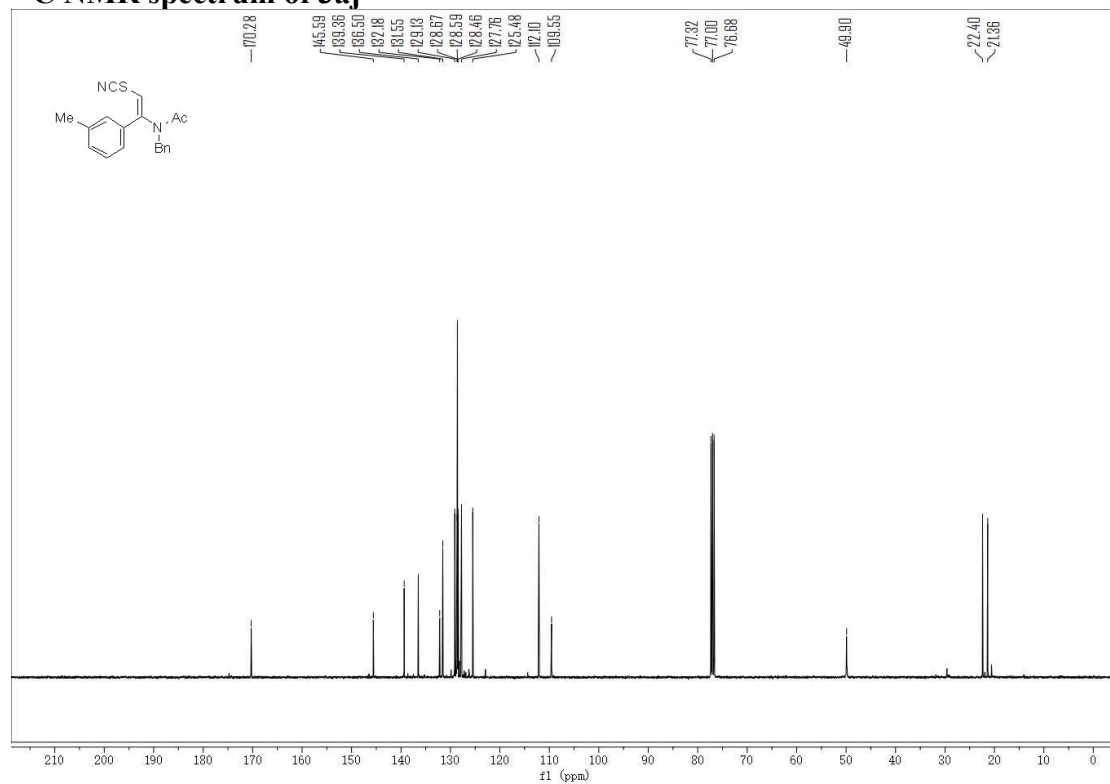

### <sup>1</sup>H NMR spectrum of 3ak

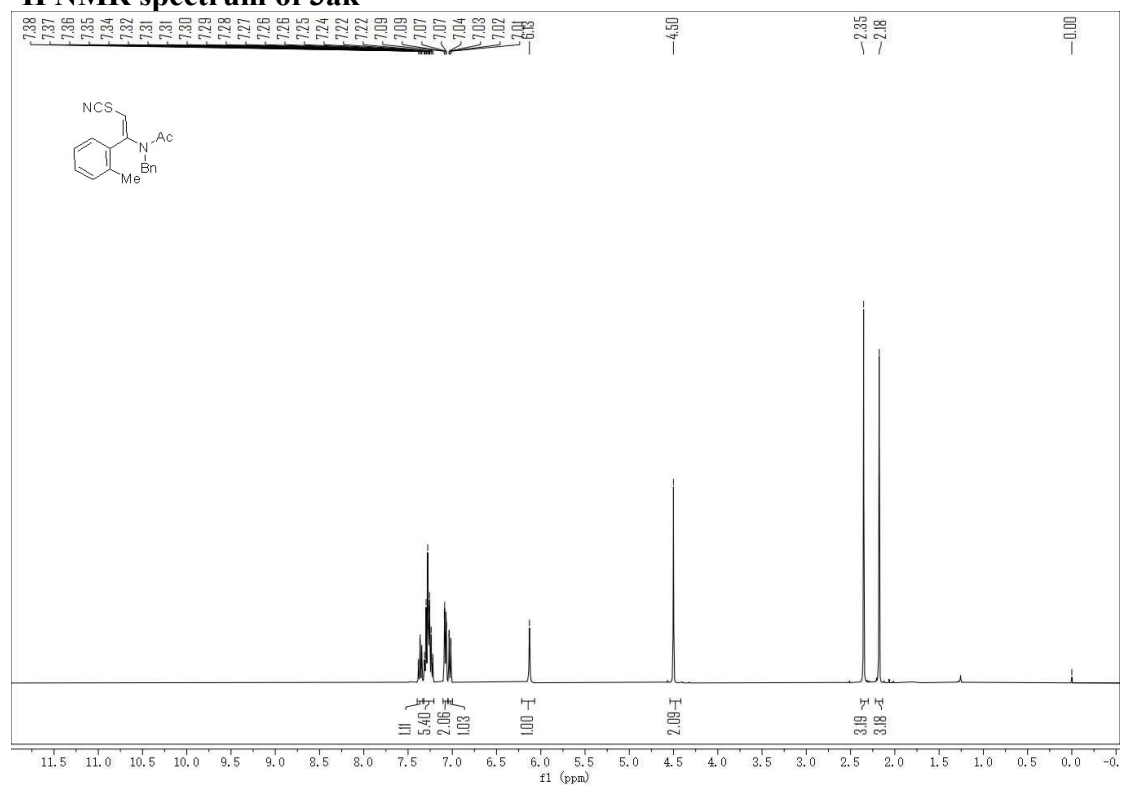

### <sup>13</sup>C NMR spectrum of 3ak

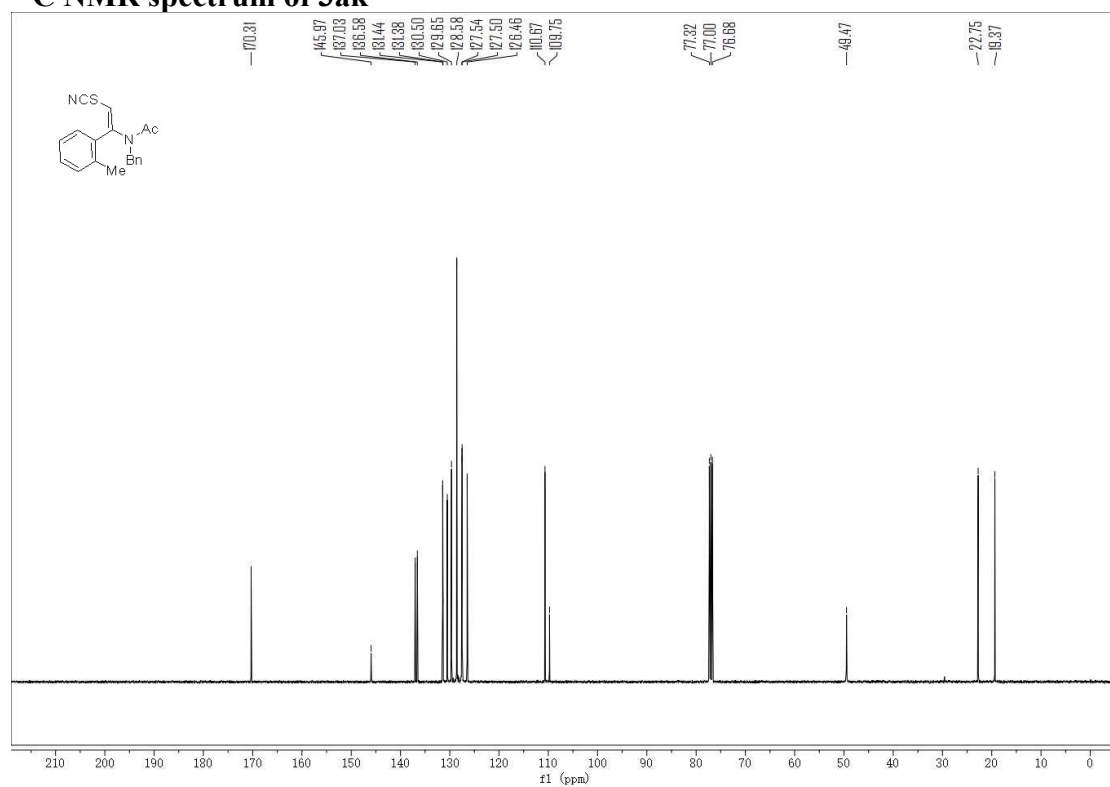

### <sup>1</sup>H NMR spectrum of 3al

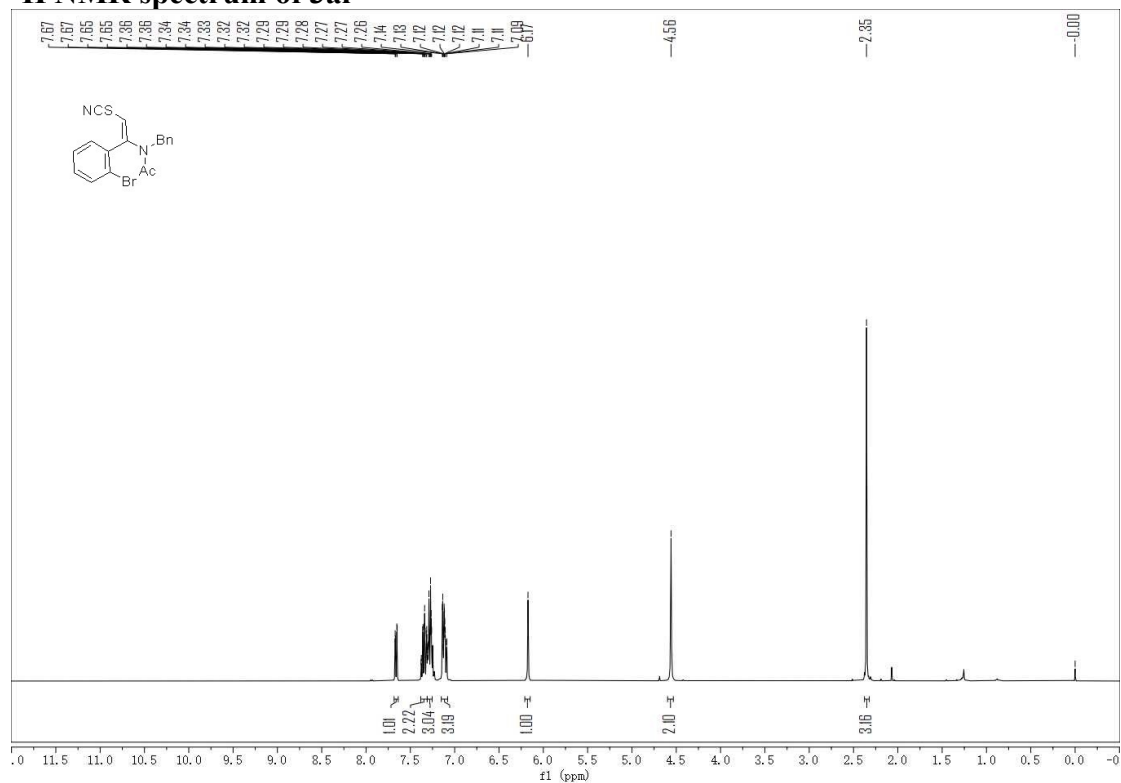

### <sup>13</sup>C NMR spectrum of 3al

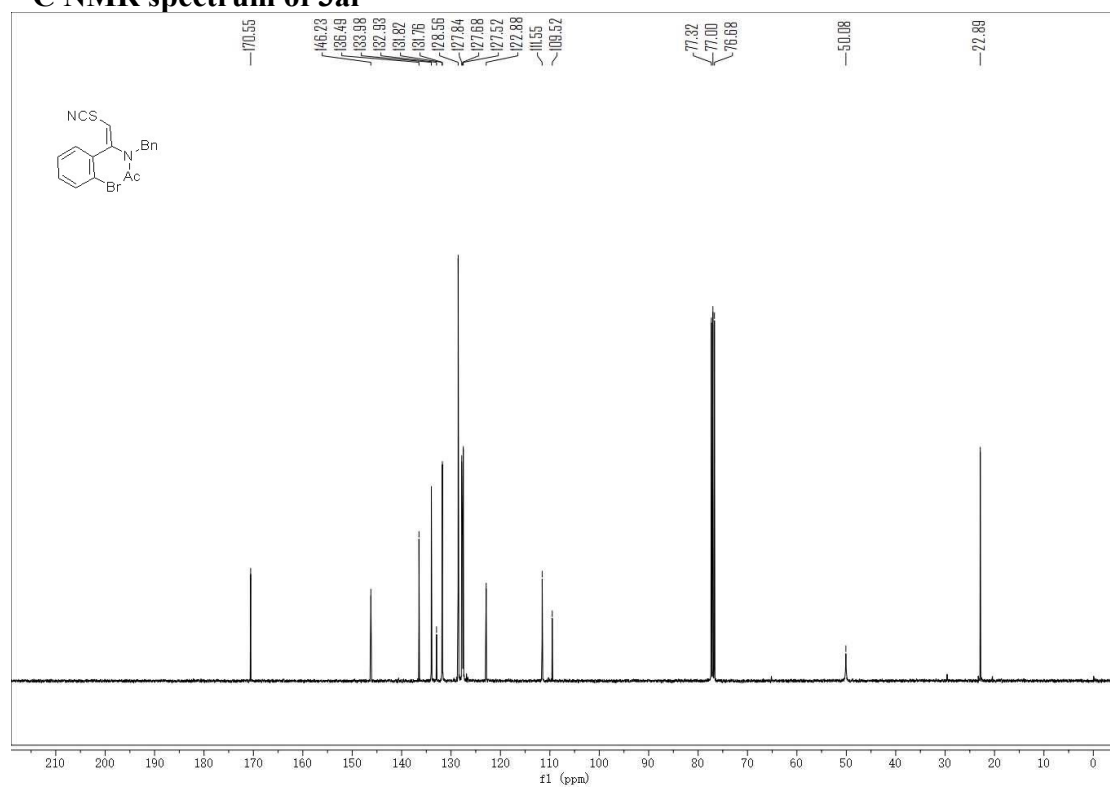



### <sup>1</sup>H NMR spectrum of 3am

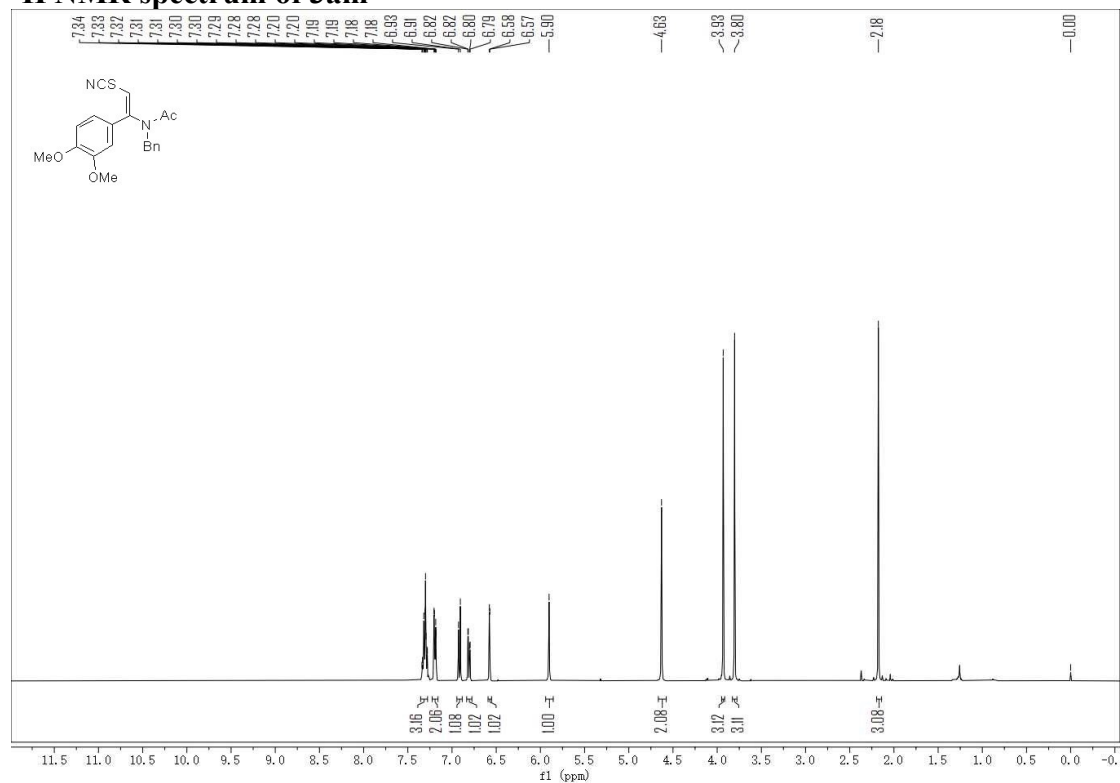

### <sup>13</sup>C NMR spectrum of 3am

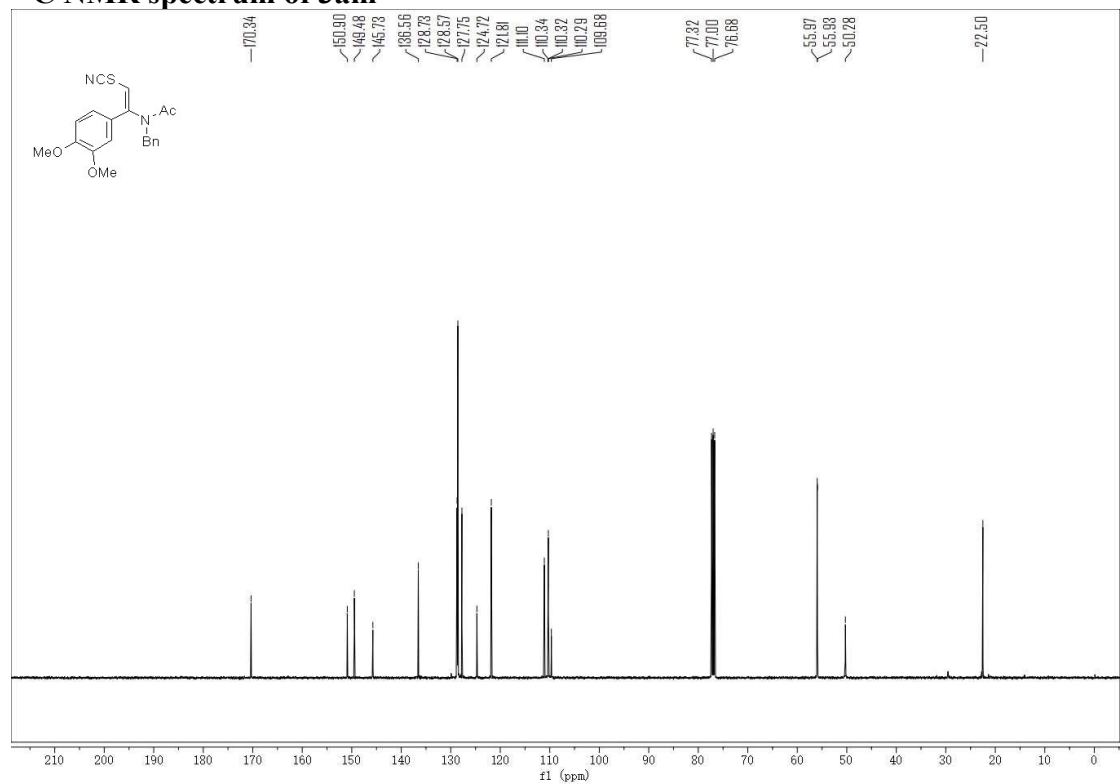

### <sup>1</sup>H NMR spectrum of 3an

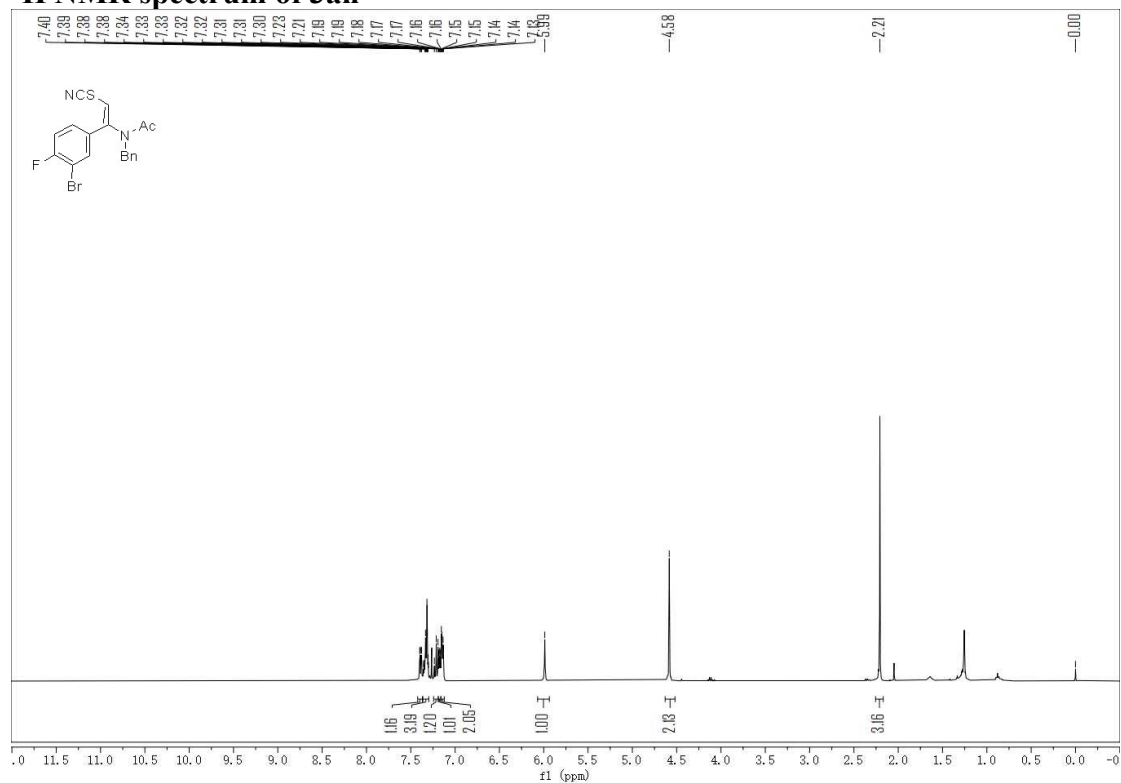

### <sup>13</sup>C NMR spectrum of 3an

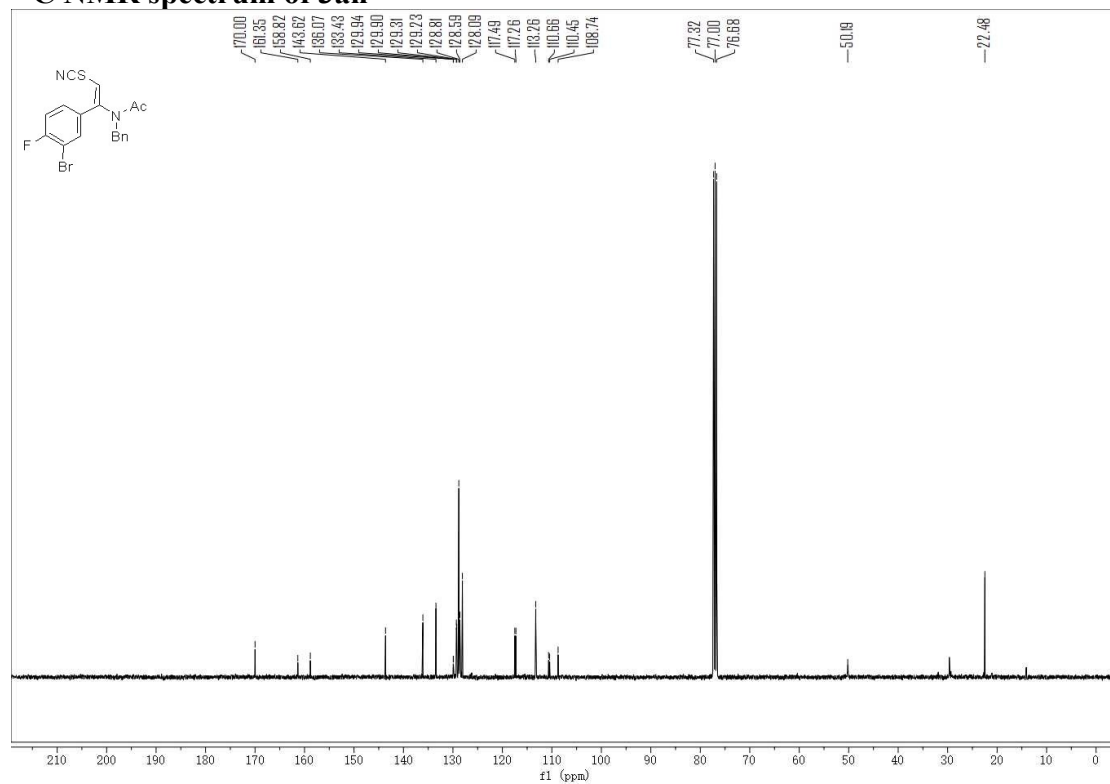

### <sup>19</sup>F NMR spectrum of 3an

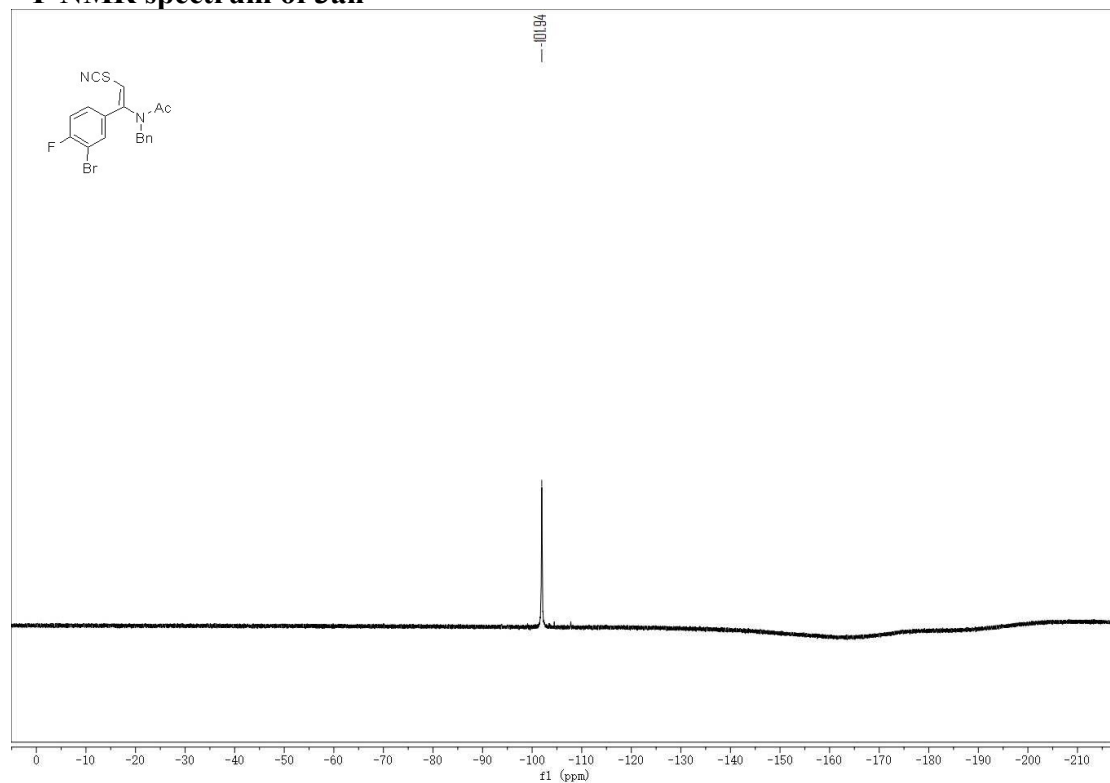

### <sup>1</sup>H NMR spectrum of 3ao

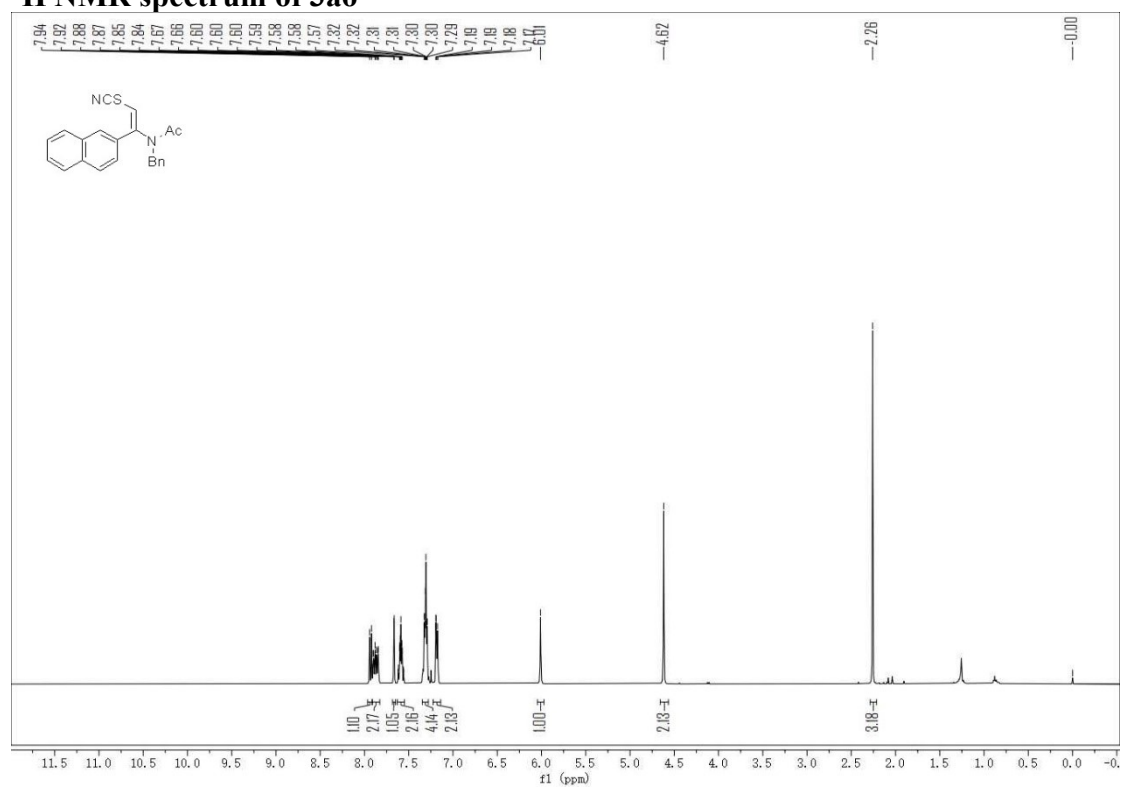

### <sup>13</sup>C NMR spectrum of 3ao

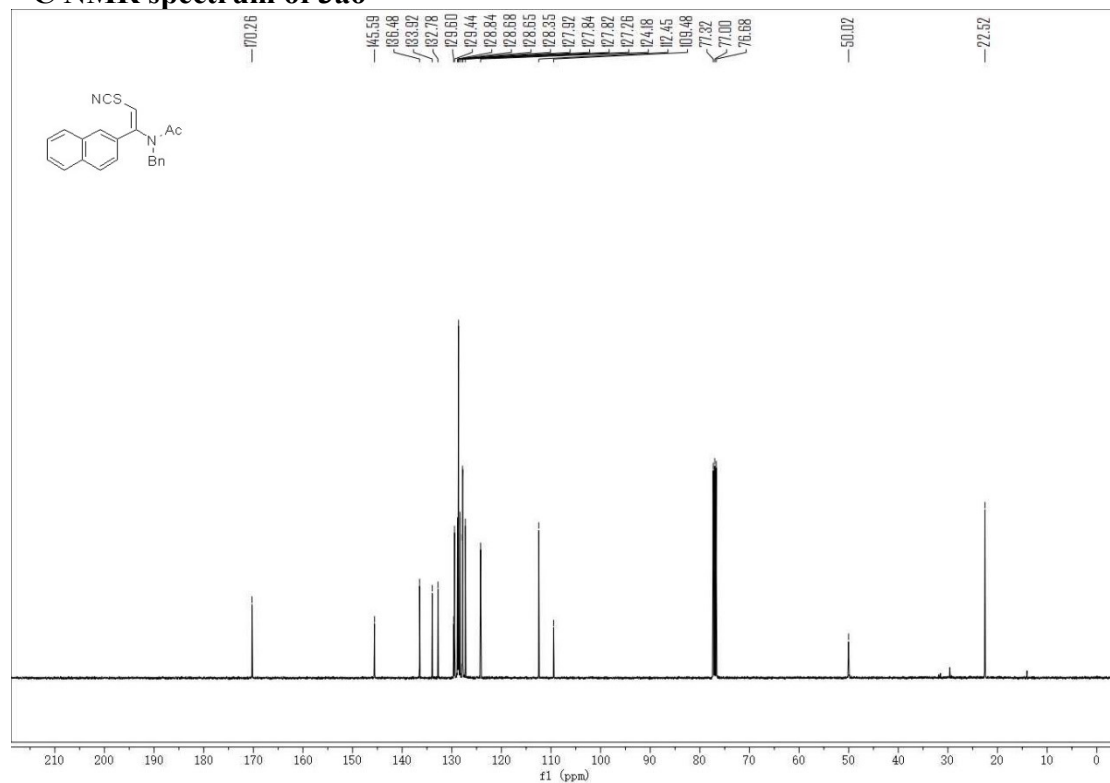

### <sup>1</sup>H NMR spectrum of 3ap

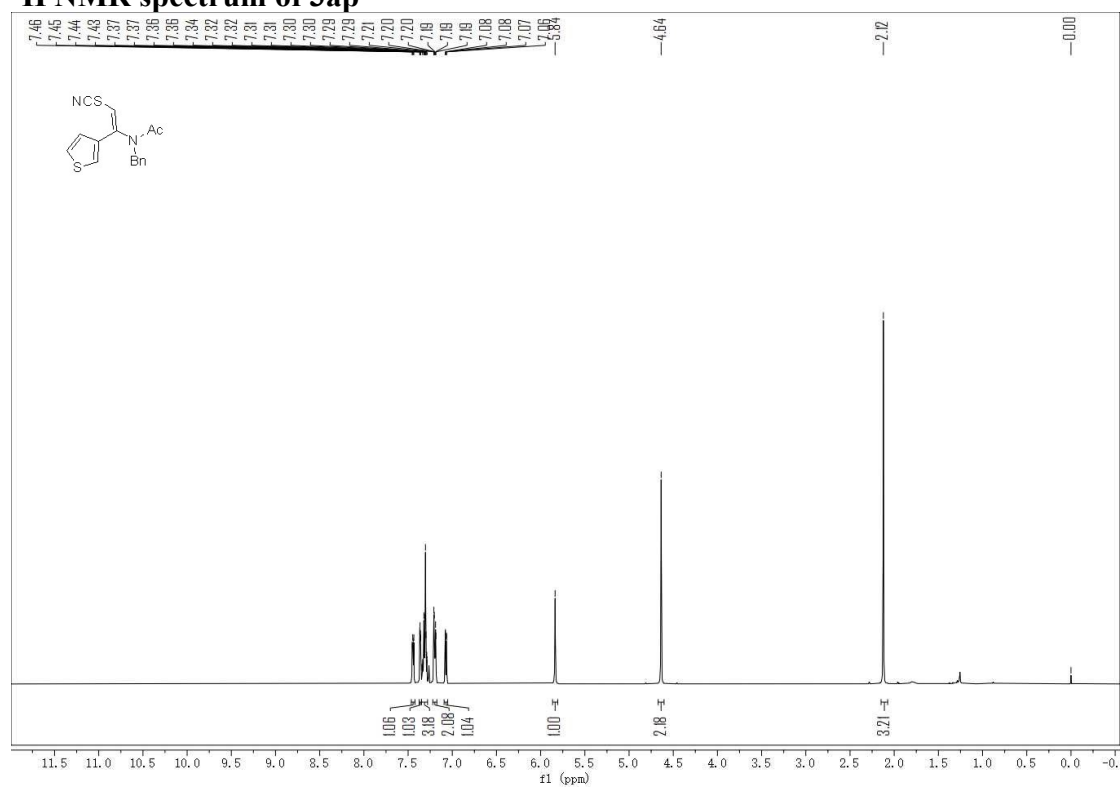

### <sup>13</sup>C NMR spectrum of 3ap

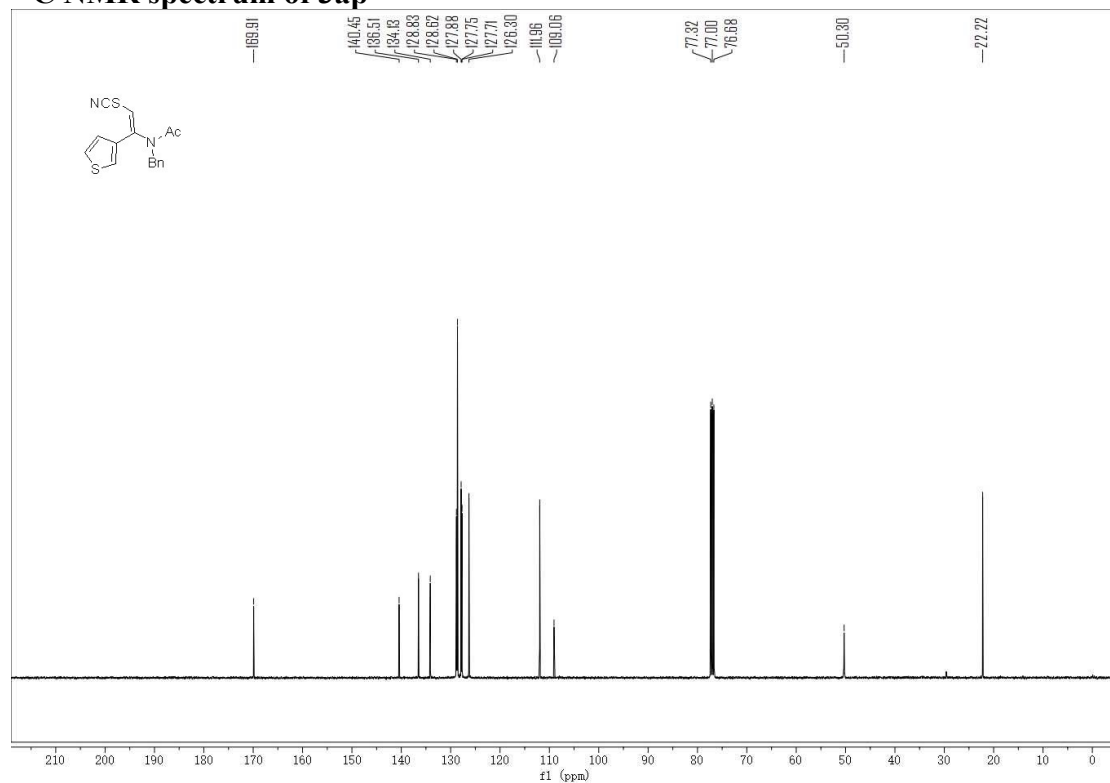

### <sup>1</sup>H NMR spectrum of 3aq

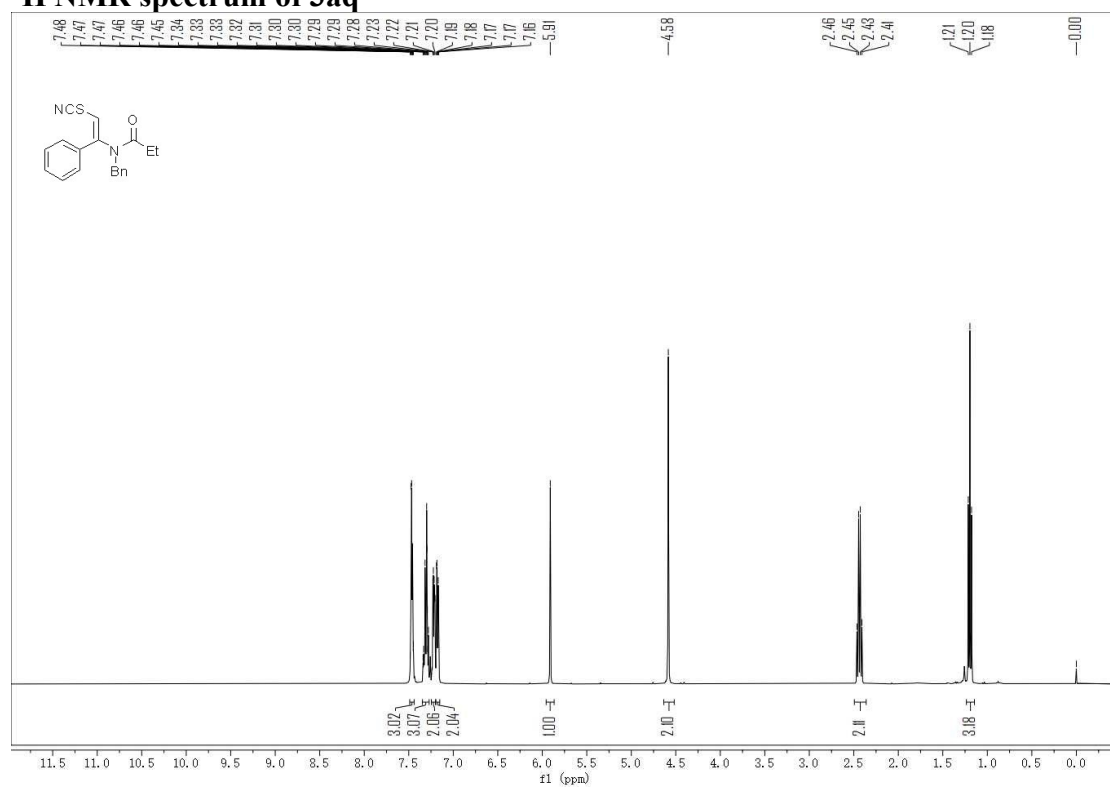

### <sup>13</sup>C NMR spectrum of 3a

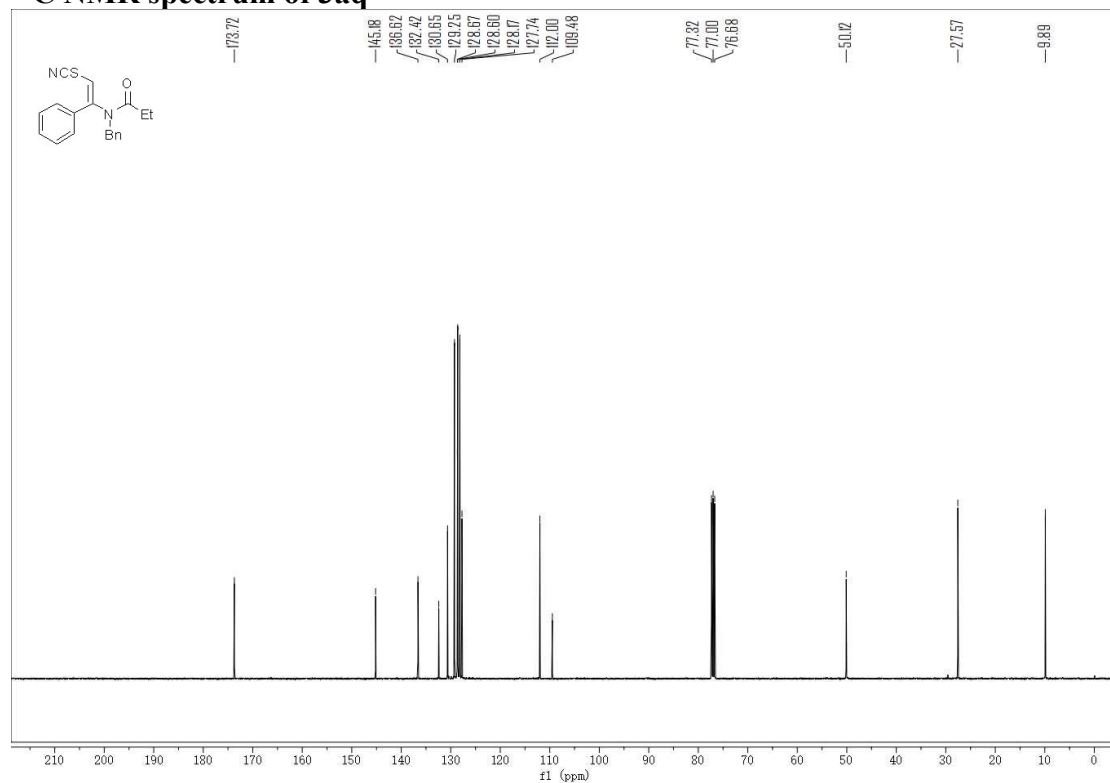

### <sup>1</sup>H NMR spectrum of 3a

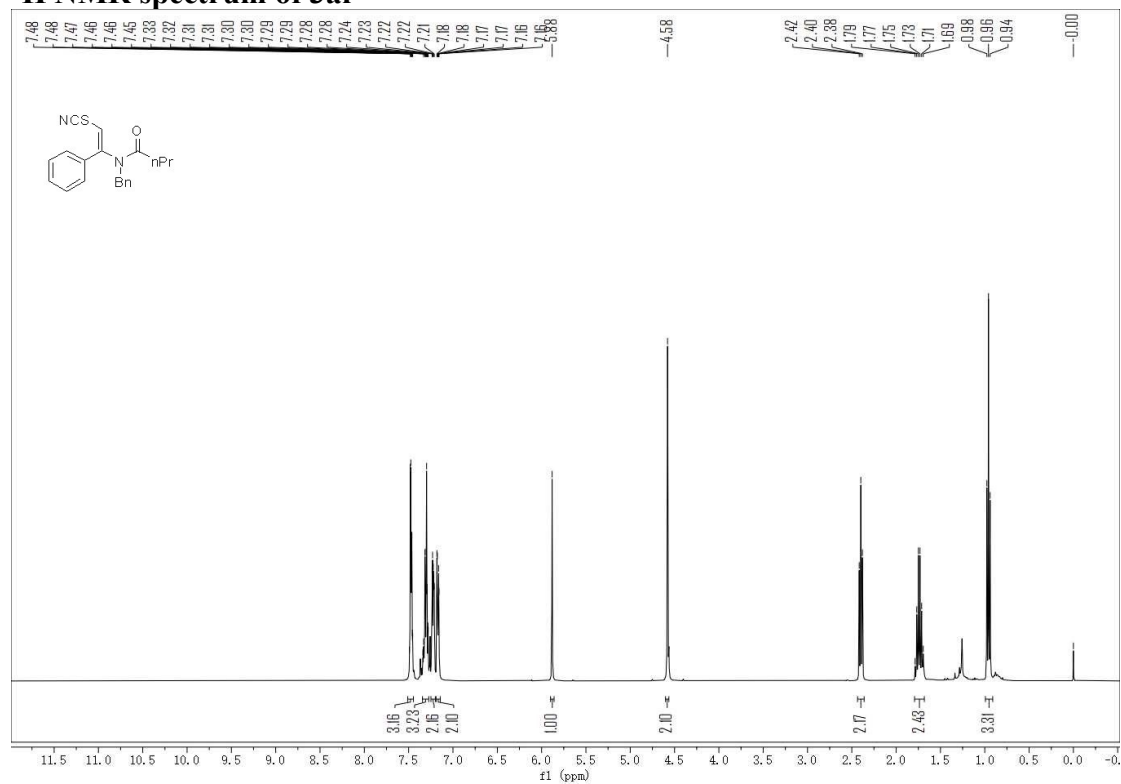

**$^{13}\text{C}$  NMR spectrum of 3ar**

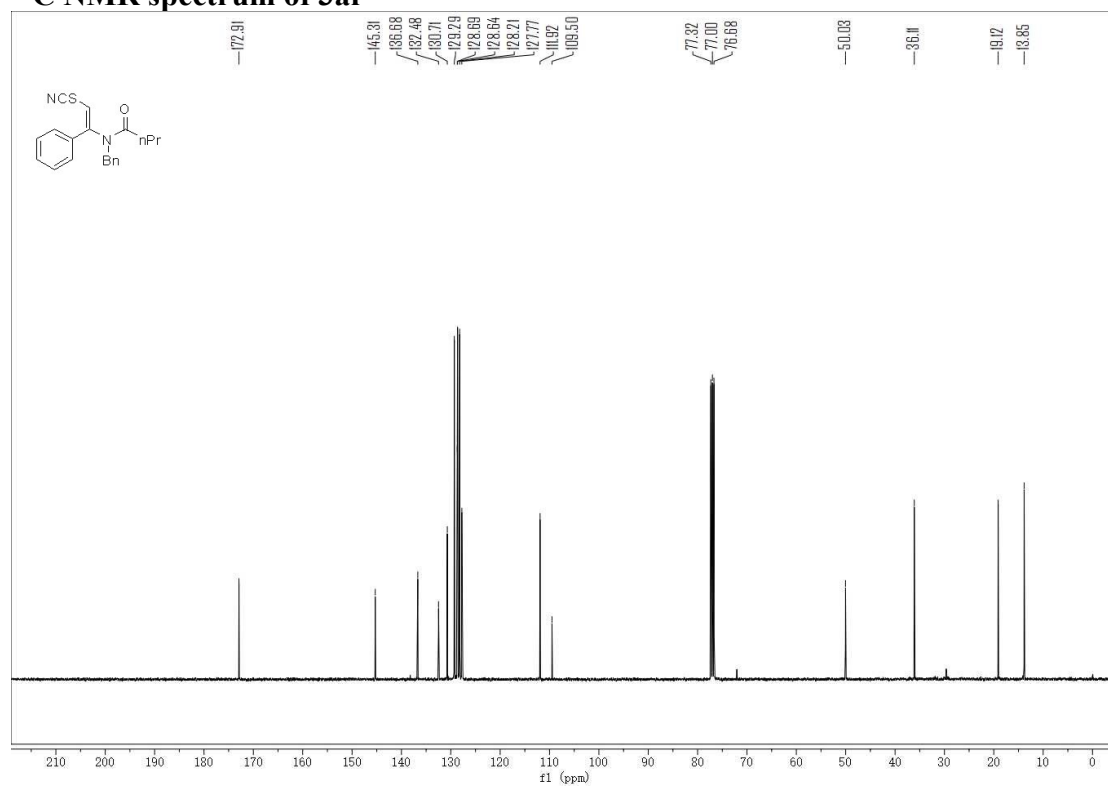

**$^1\text{H}$  NMR spectrum of 3as**

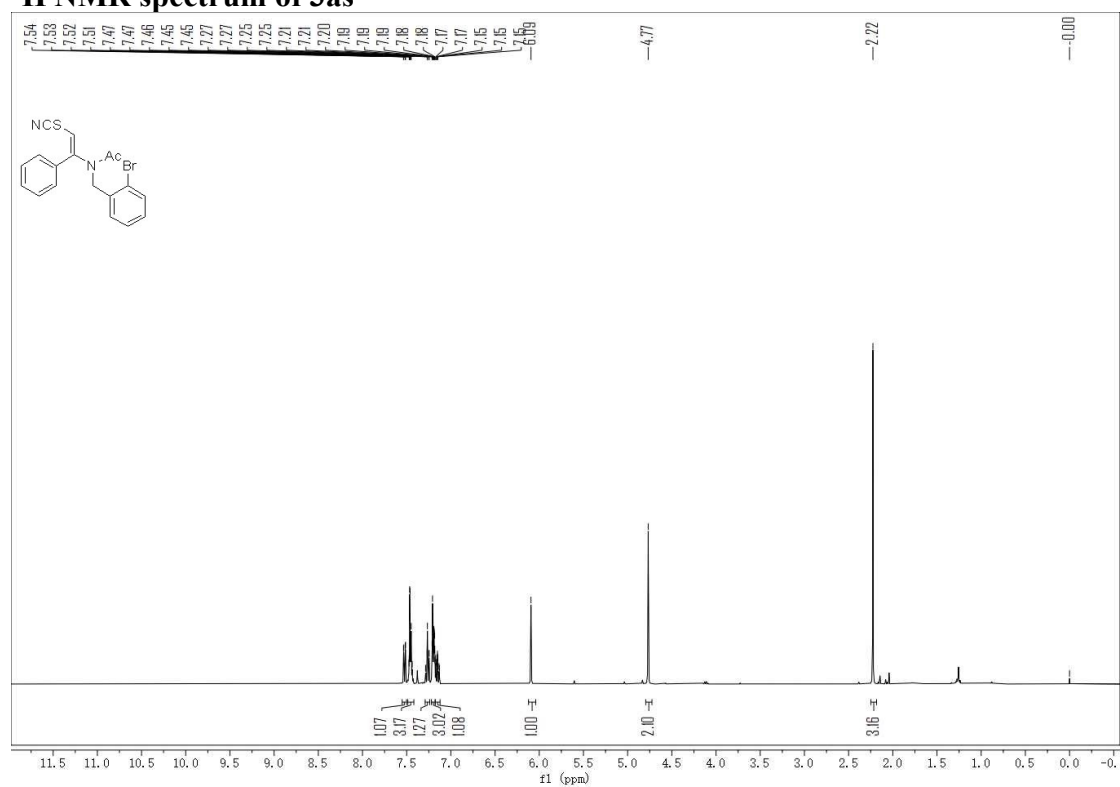

### <sup>13</sup>C NMR spectrum of 3as

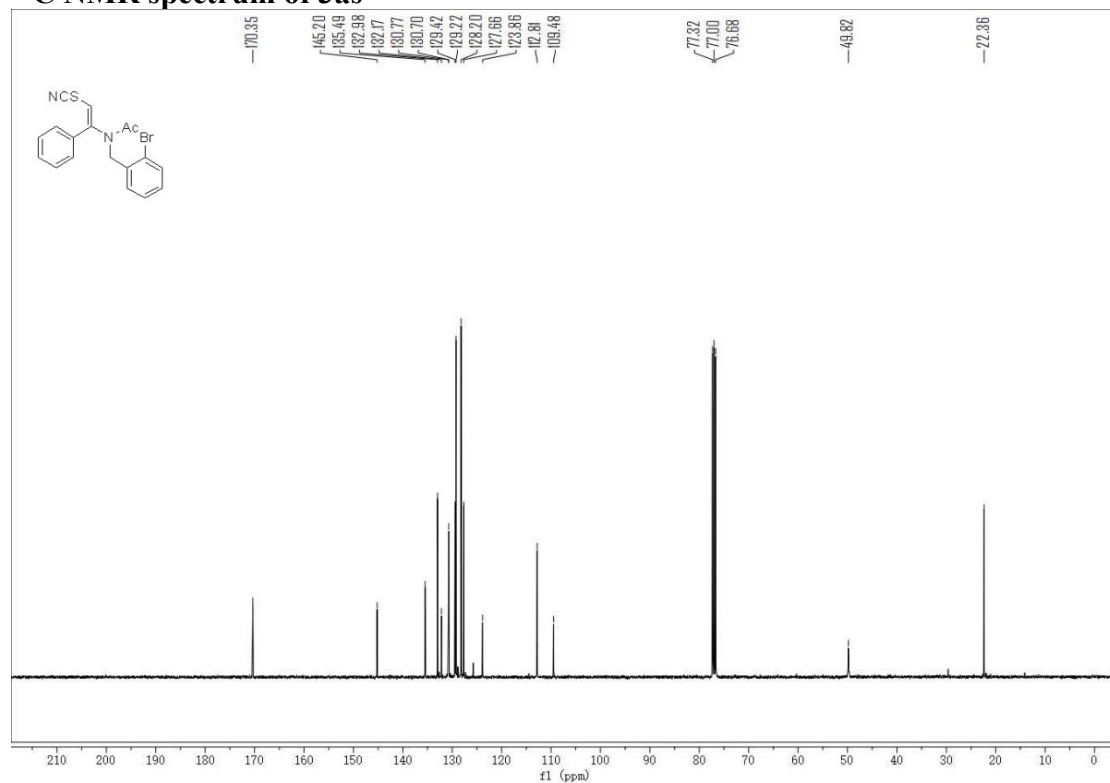

### <sup>1</sup>H NMR spectrum of 3at

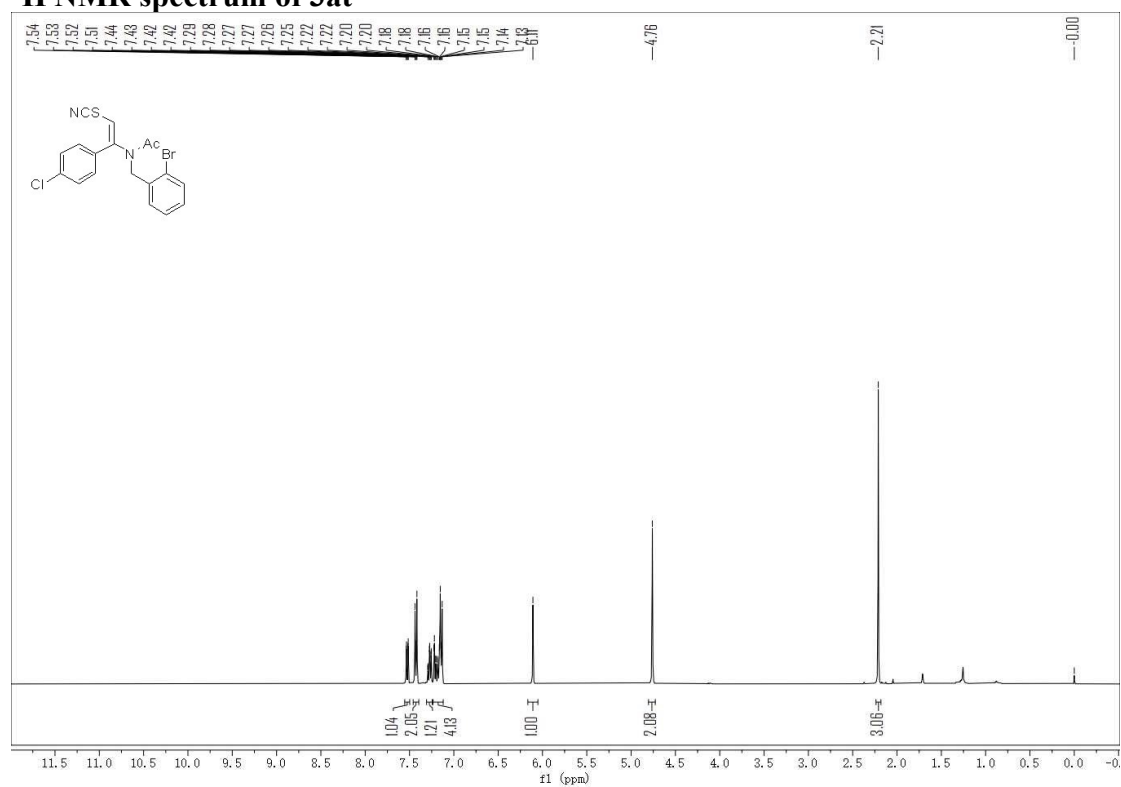



### <sup>13</sup>C NMR spectrum of 3at

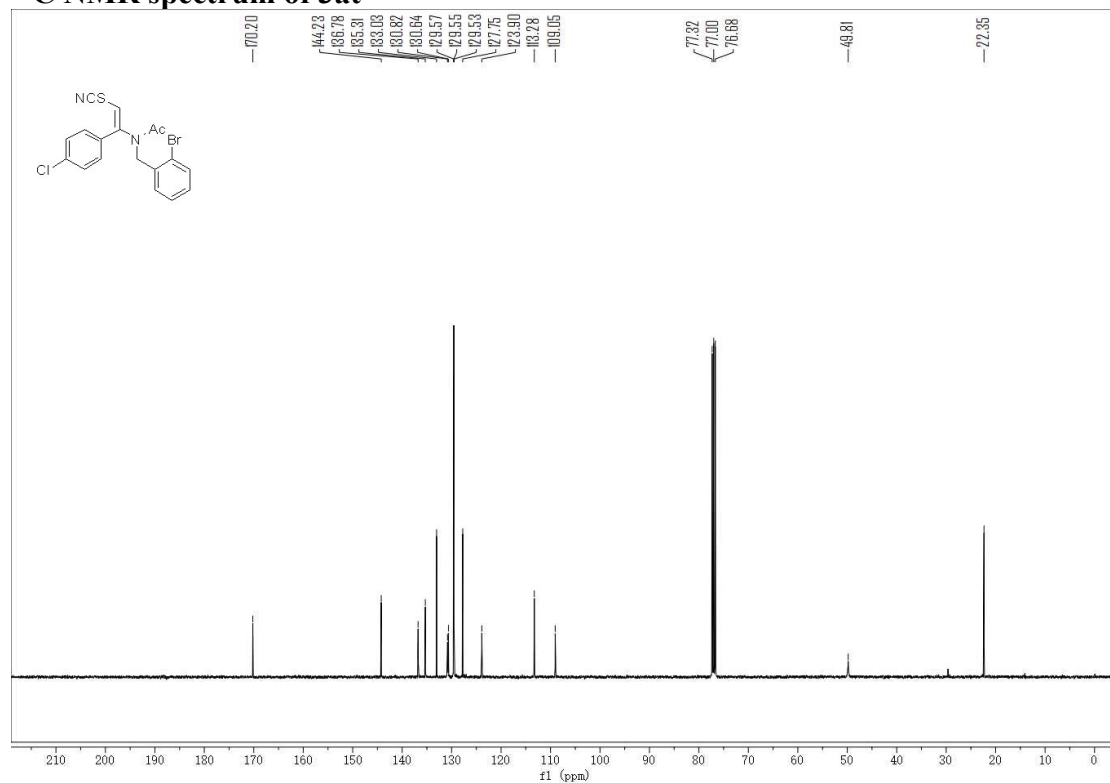

### <sup>1</sup>H NMR spectrum of 3au

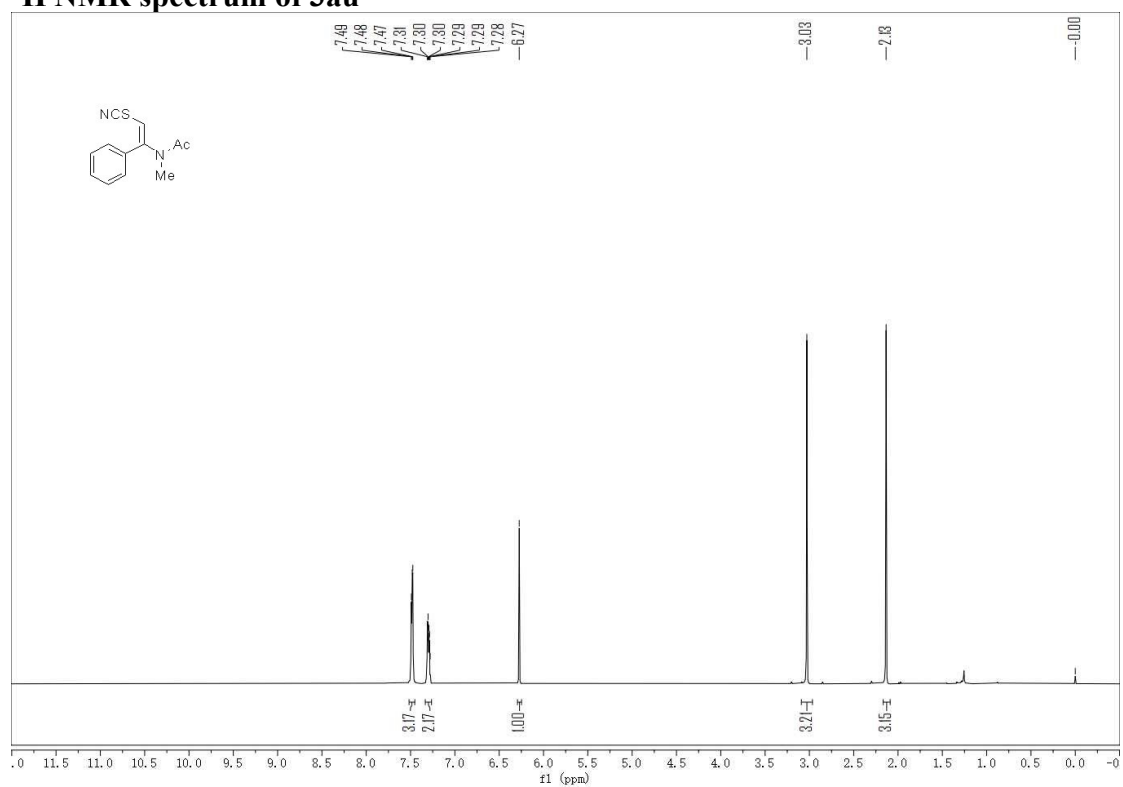

### <sup>13</sup>C NMR spectrum of 3au

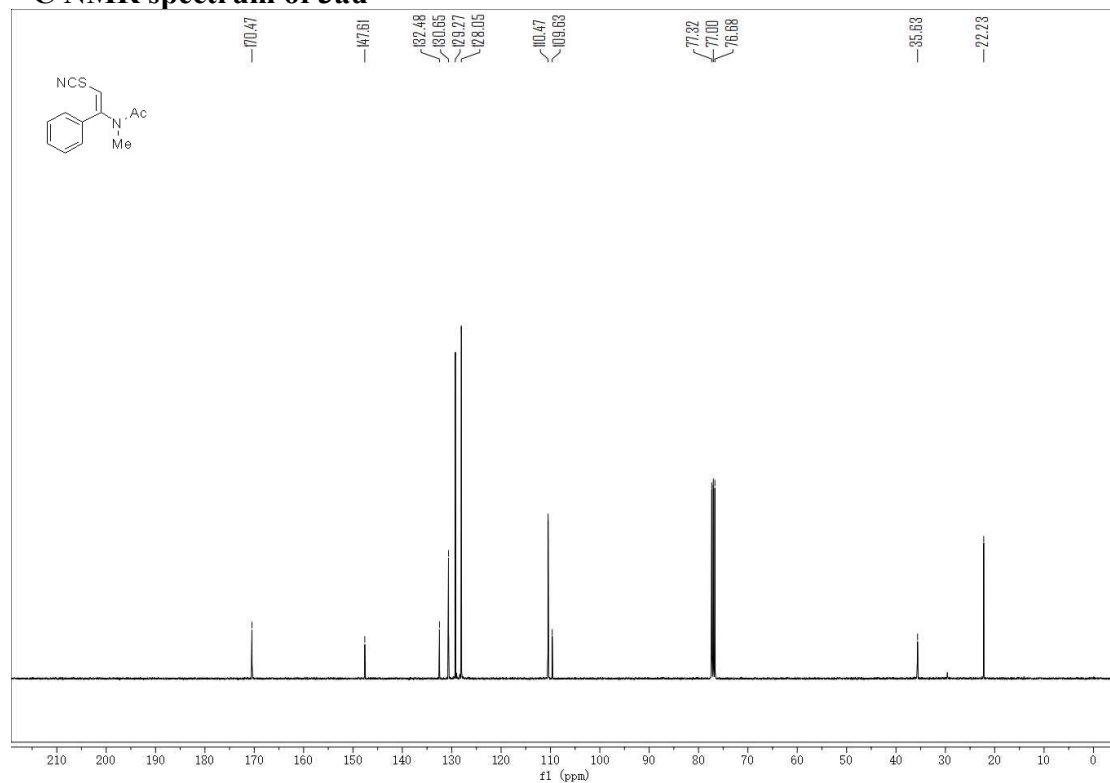

### <sup>1</sup>H NMR spectrum of 3av

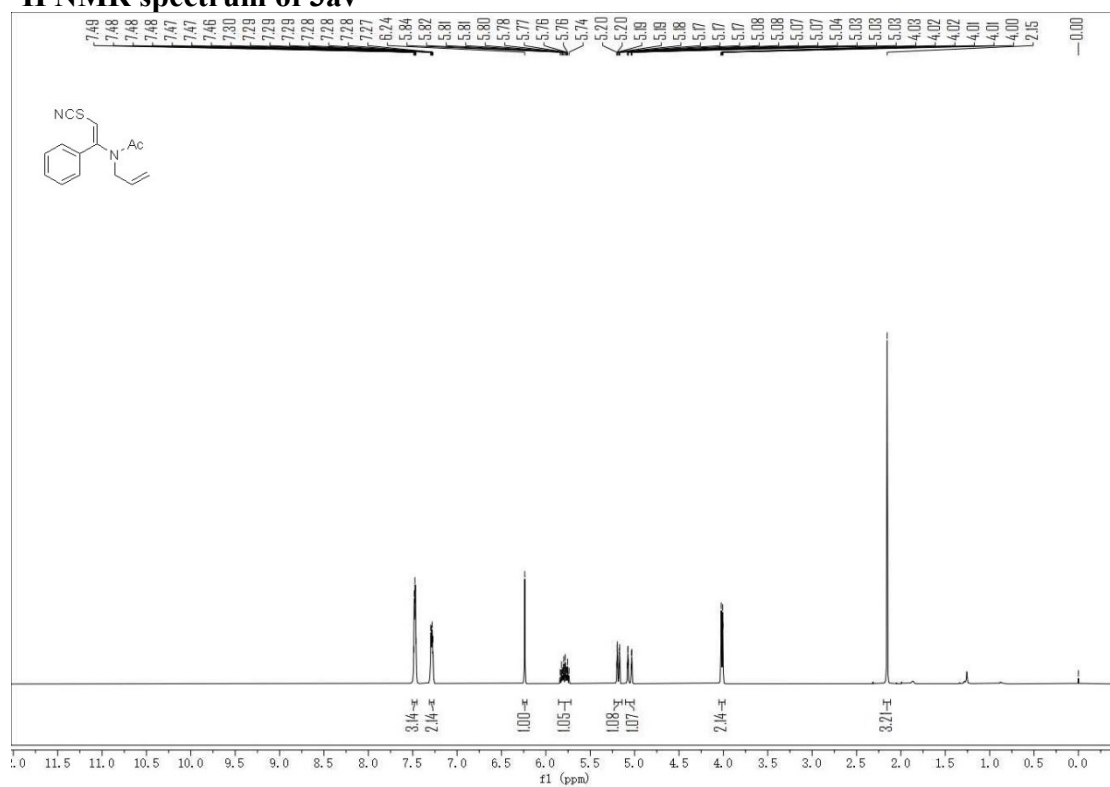

### <sup>13</sup>C NMR spectrum of 3av

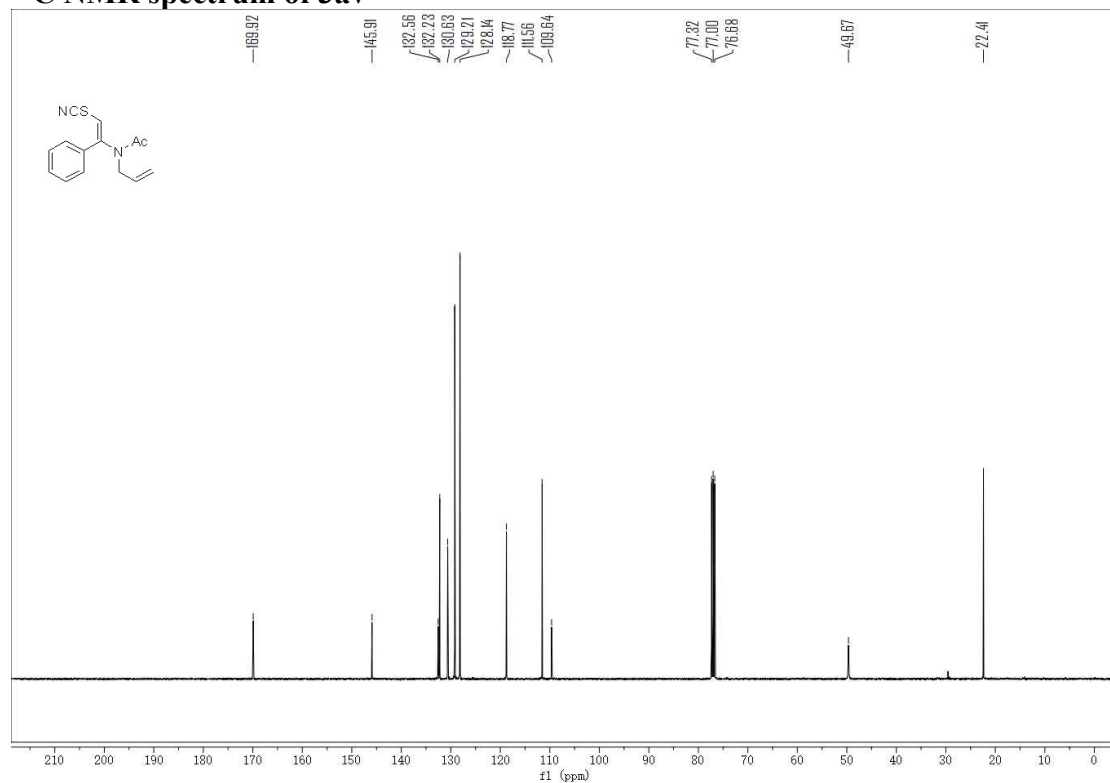

### <sup>1</sup>H NMR spectrum of 3av

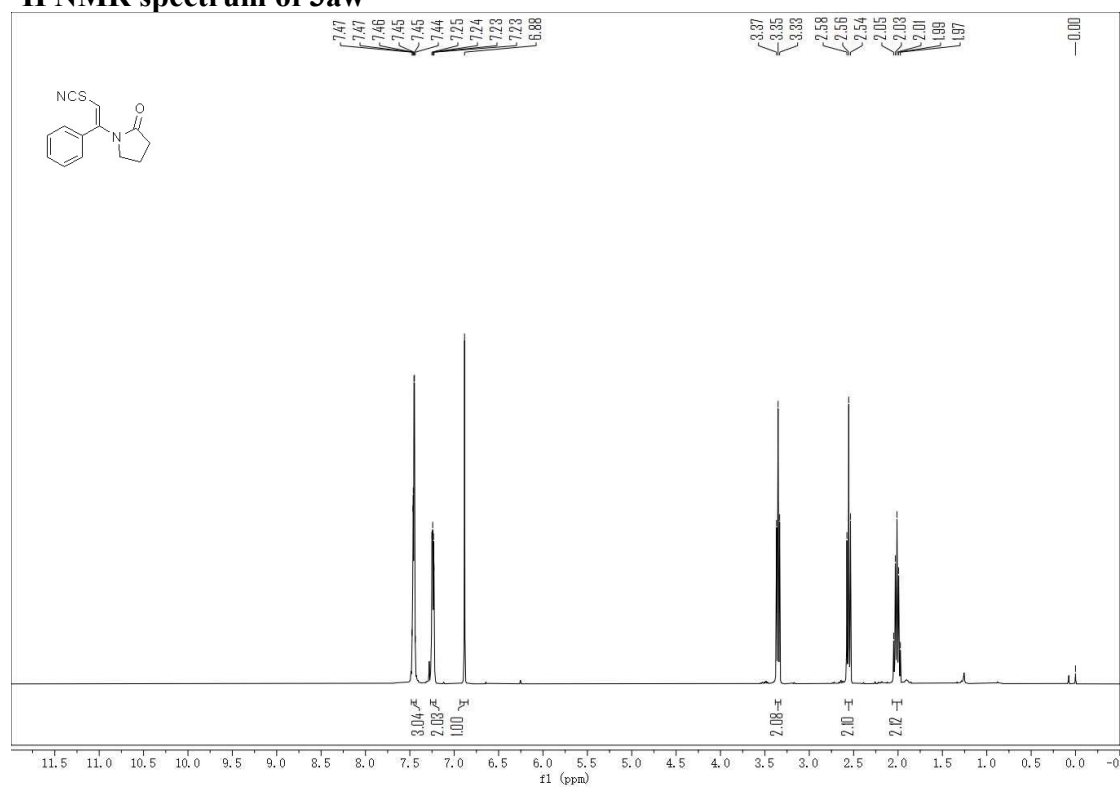

### <sup>13</sup>C NMR spectrum of 3aw

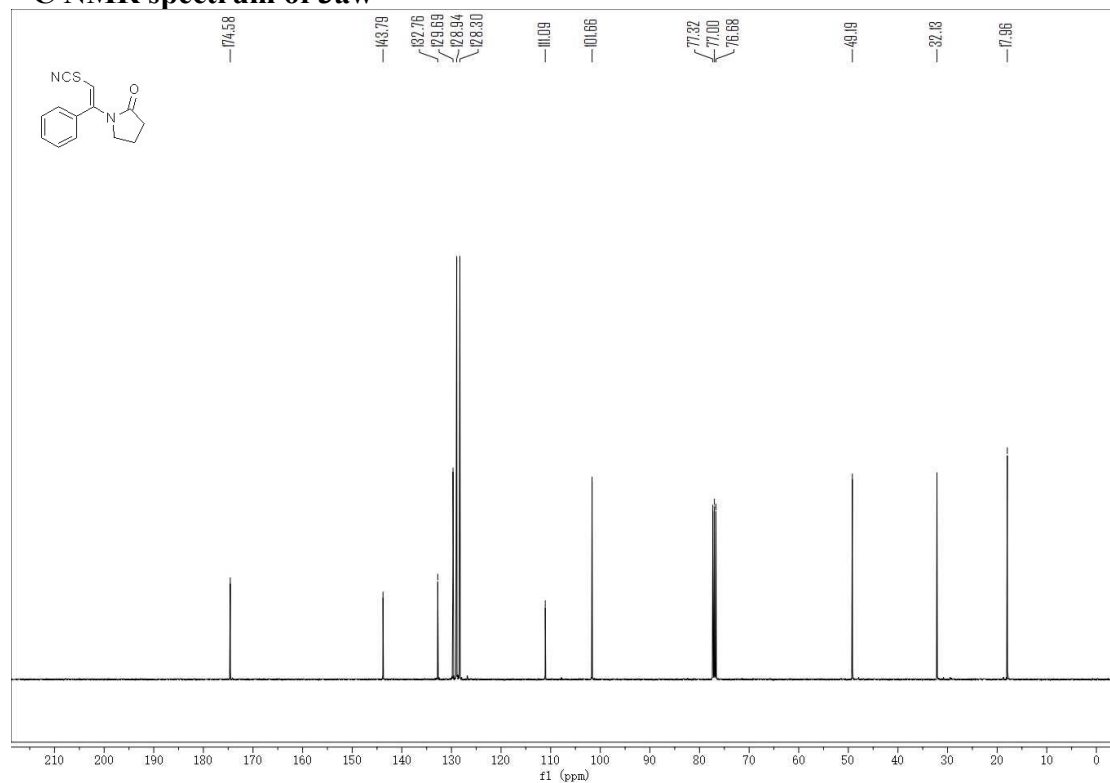

### <sup>1</sup>H NMR spectrum of 5aa

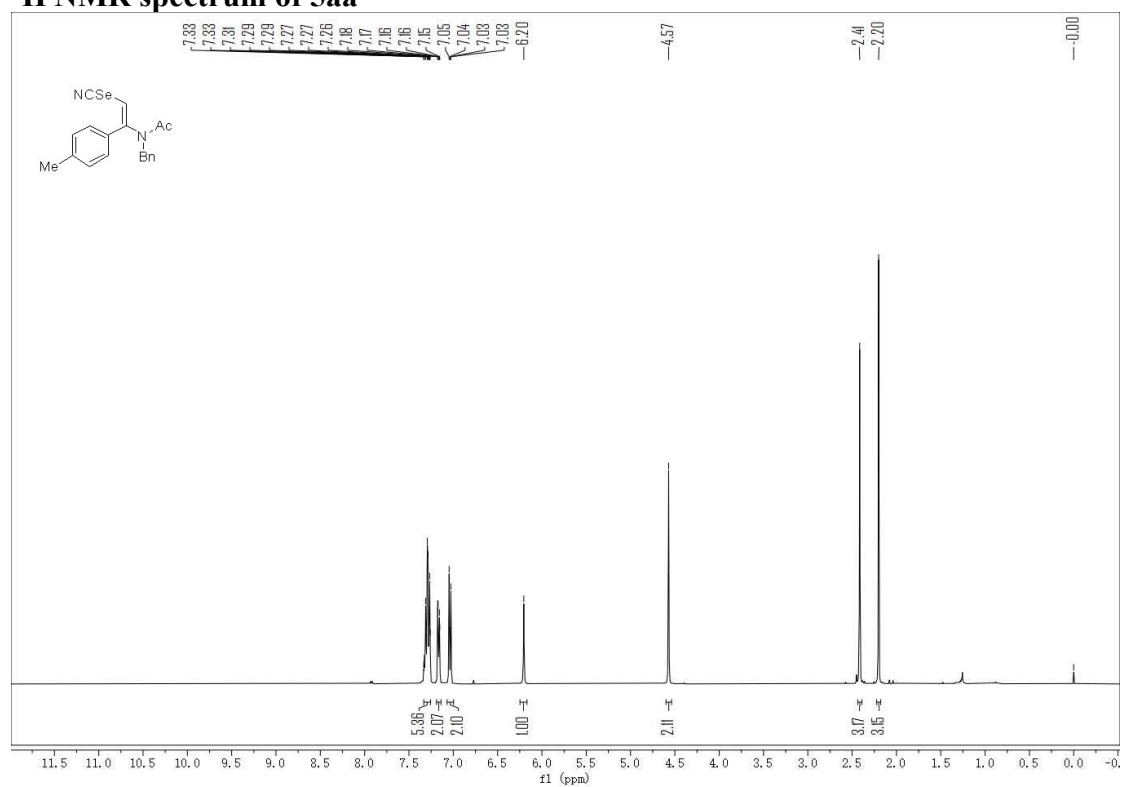

### <sup>13</sup>C NMR spectrum of 5aa

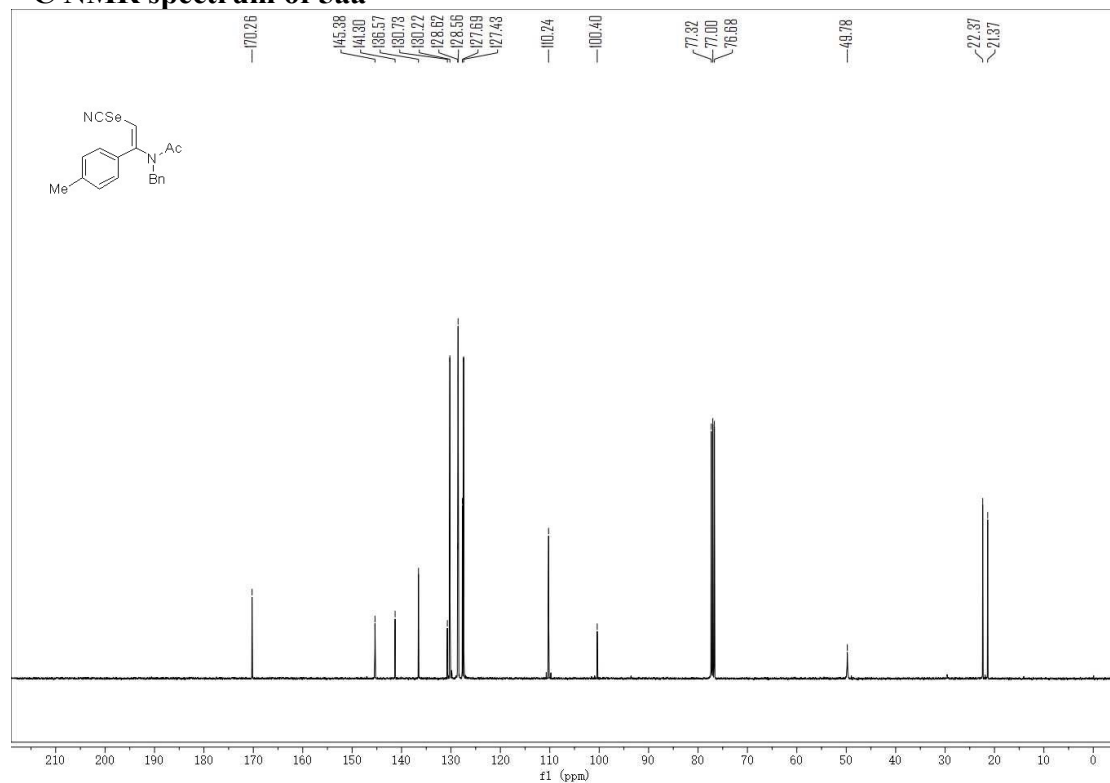

### <sup>1</sup>H NMR spectrum of 5ab

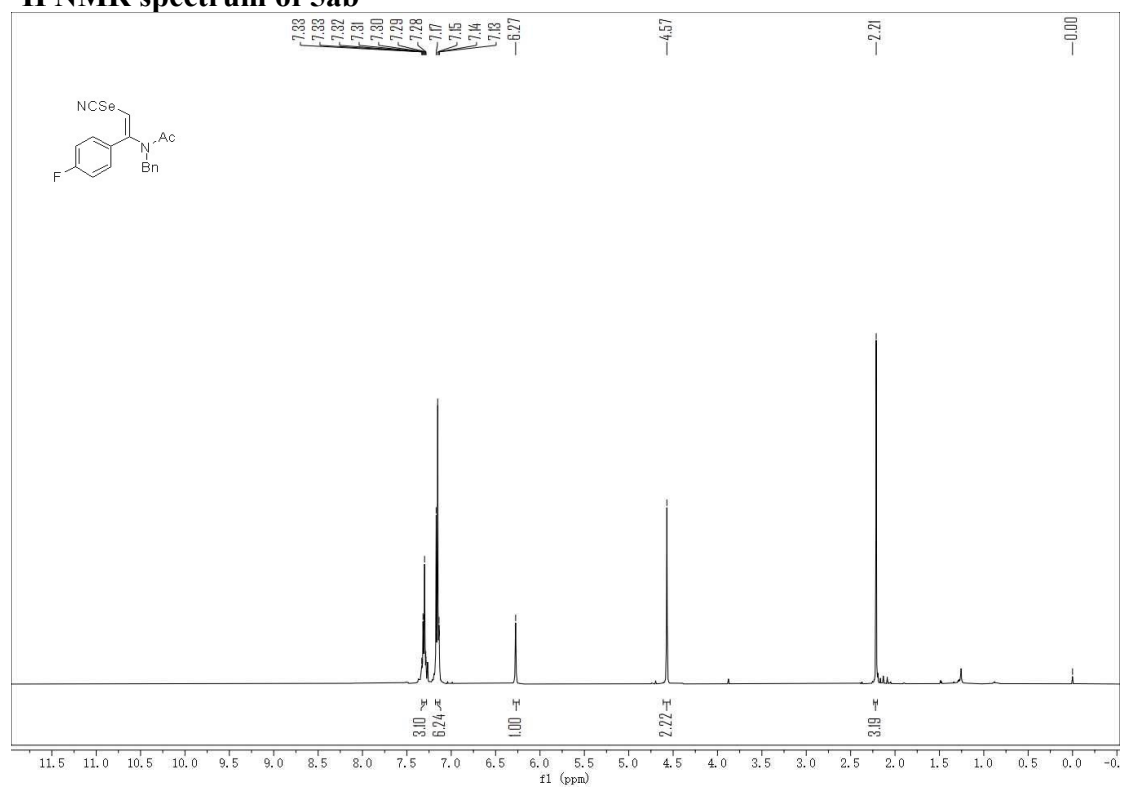

### <sup>13</sup>C NMR spectrum of 5ab

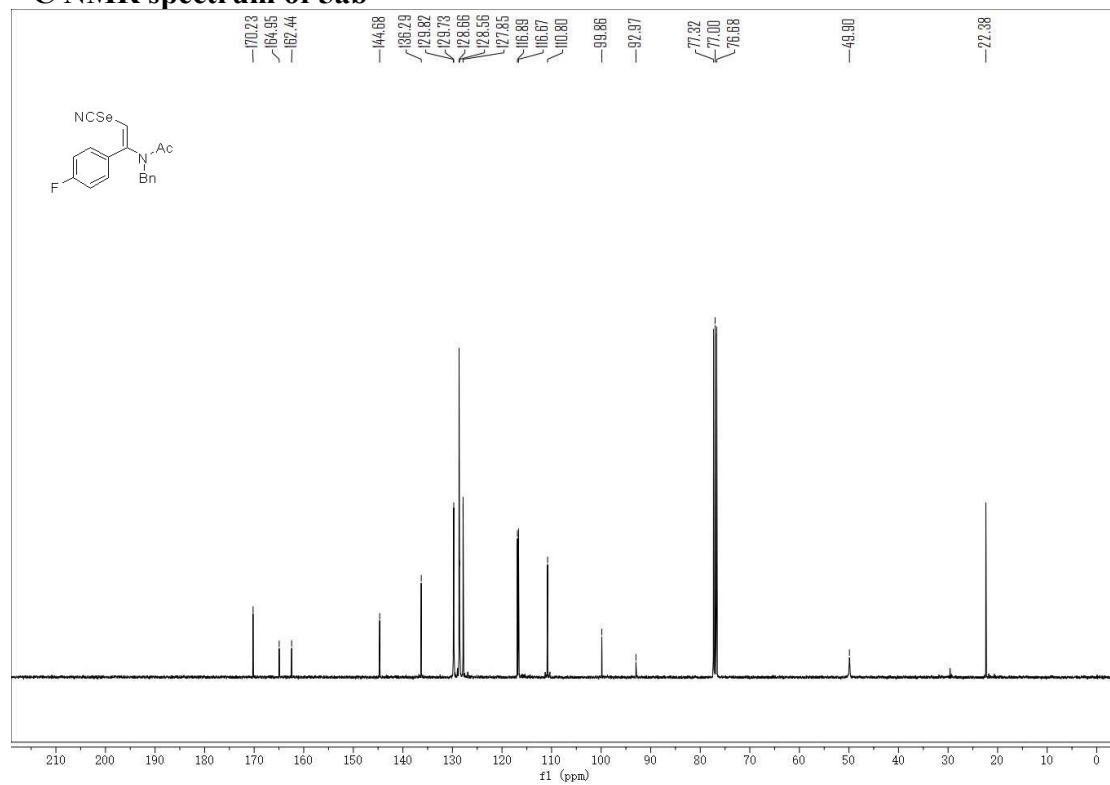

### <sup>19</sup>F NMR spectrum of 5ab

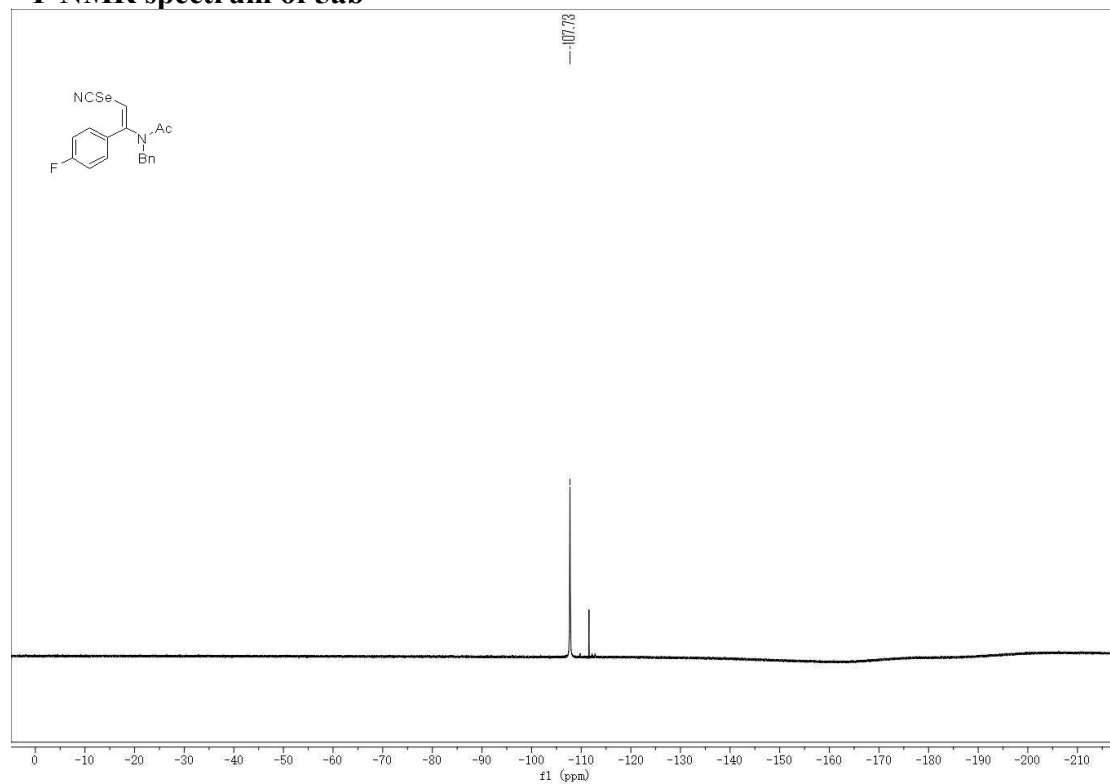

### <sup>1</sup>H NMR spectrum of 5ac

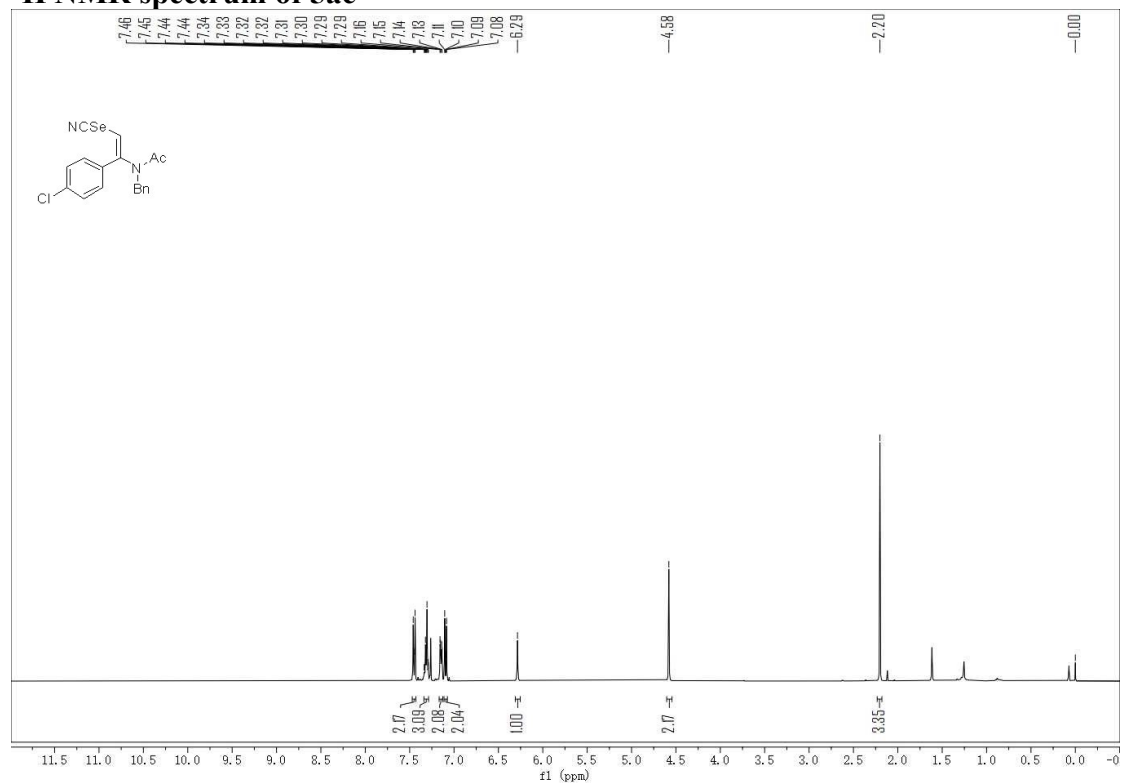

### <sup>13</sup>C NMR spectrum of 5ac

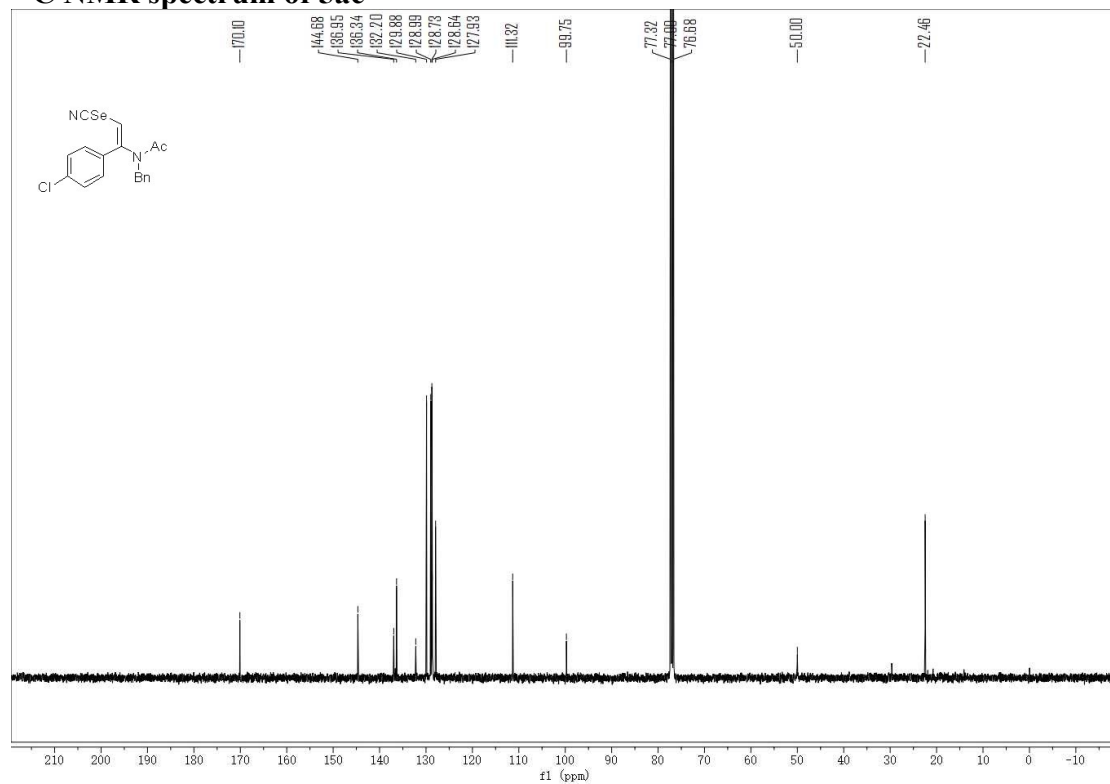

### <sup>1</sup>H NMR spectrum of 5ad

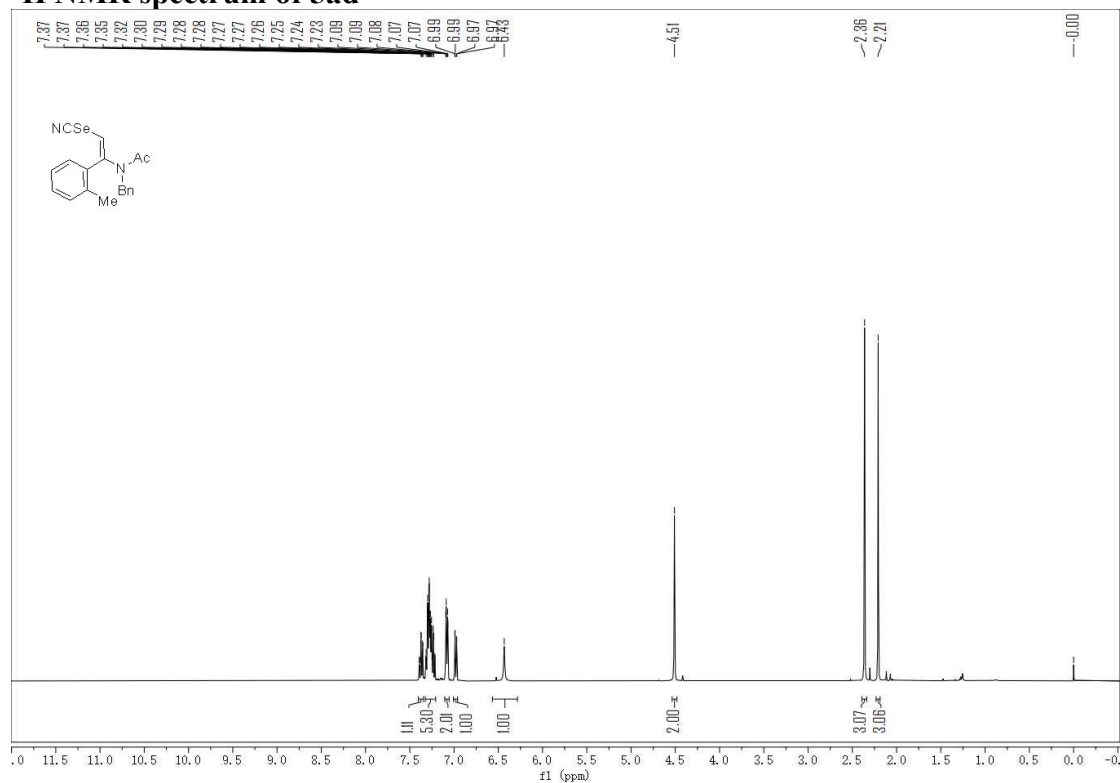

### <sup>13</sup>C NMR spectrum of 5ad

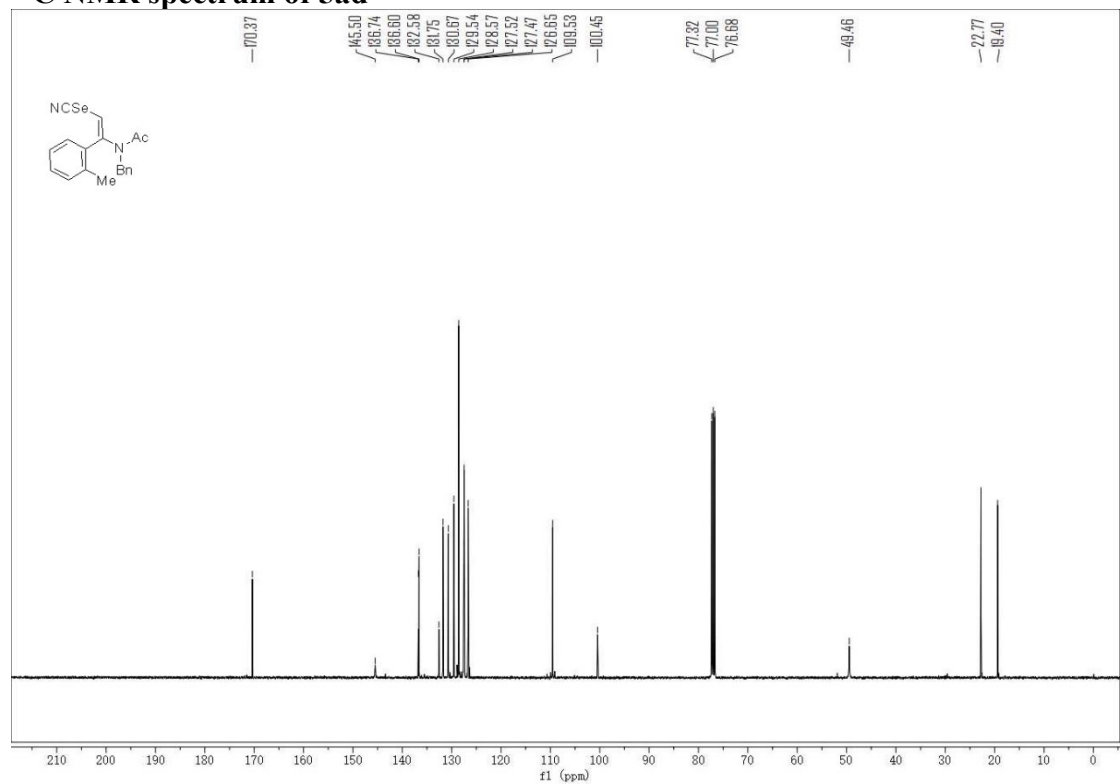



### <sup>1</sup>H NMR spectrum of 5ae

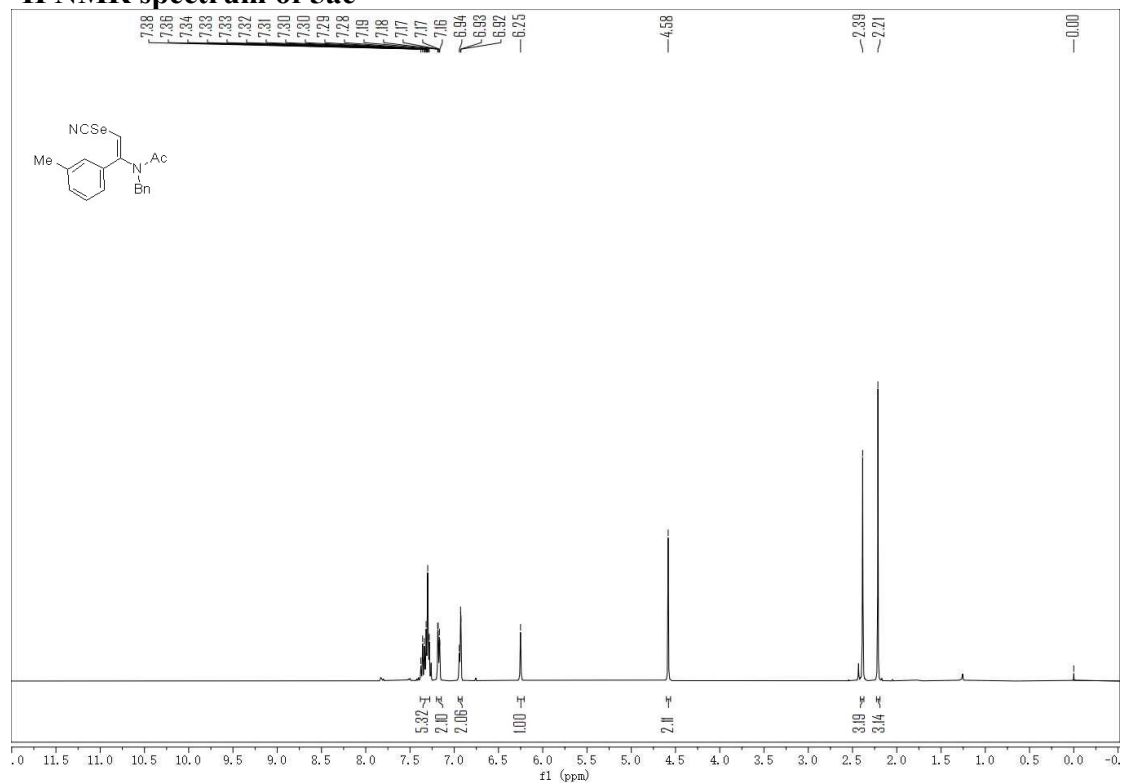

### <sup>13</sup>C NMR spectrum of 5ae

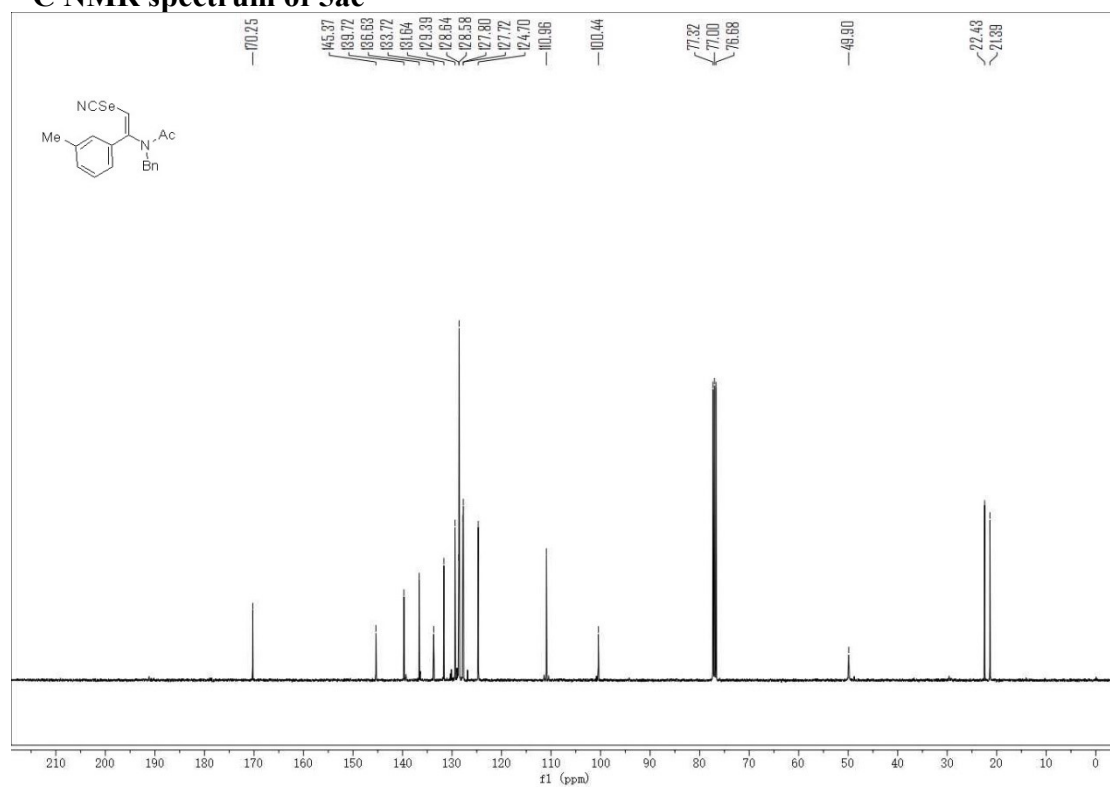

### <sup>1</sup>H NMR spectrum of 5af

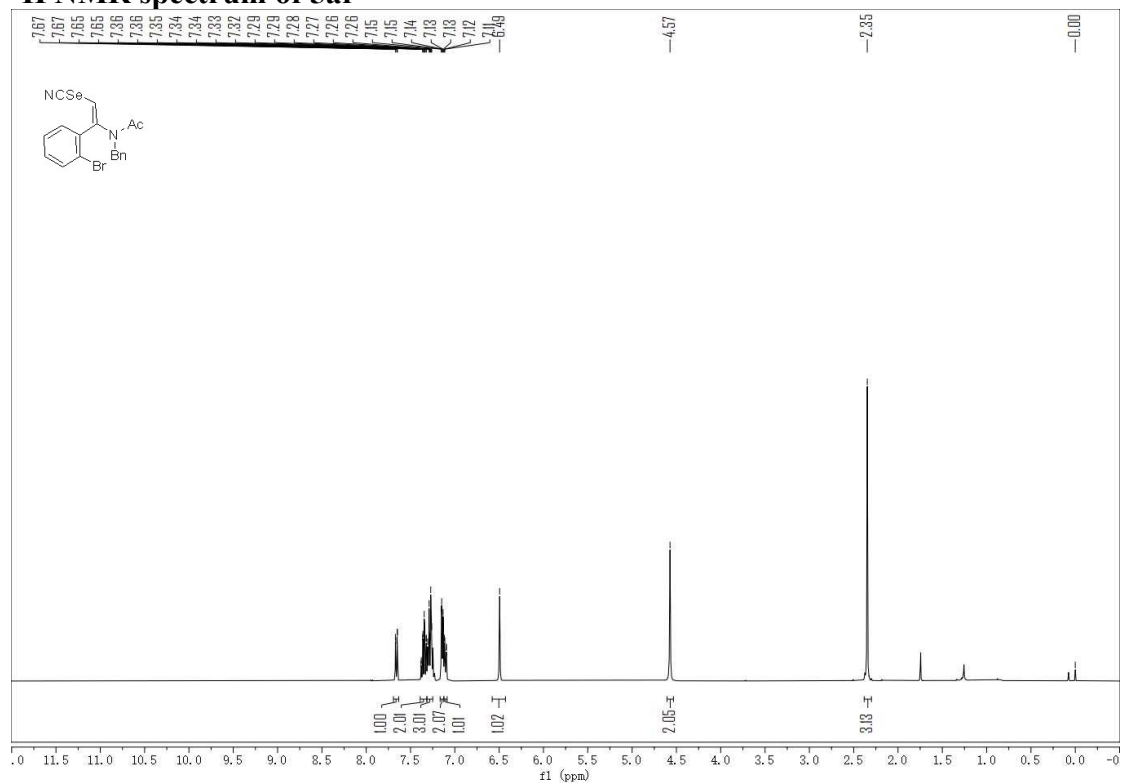

### <sup>13</sup>C NMR spectrum of 5af

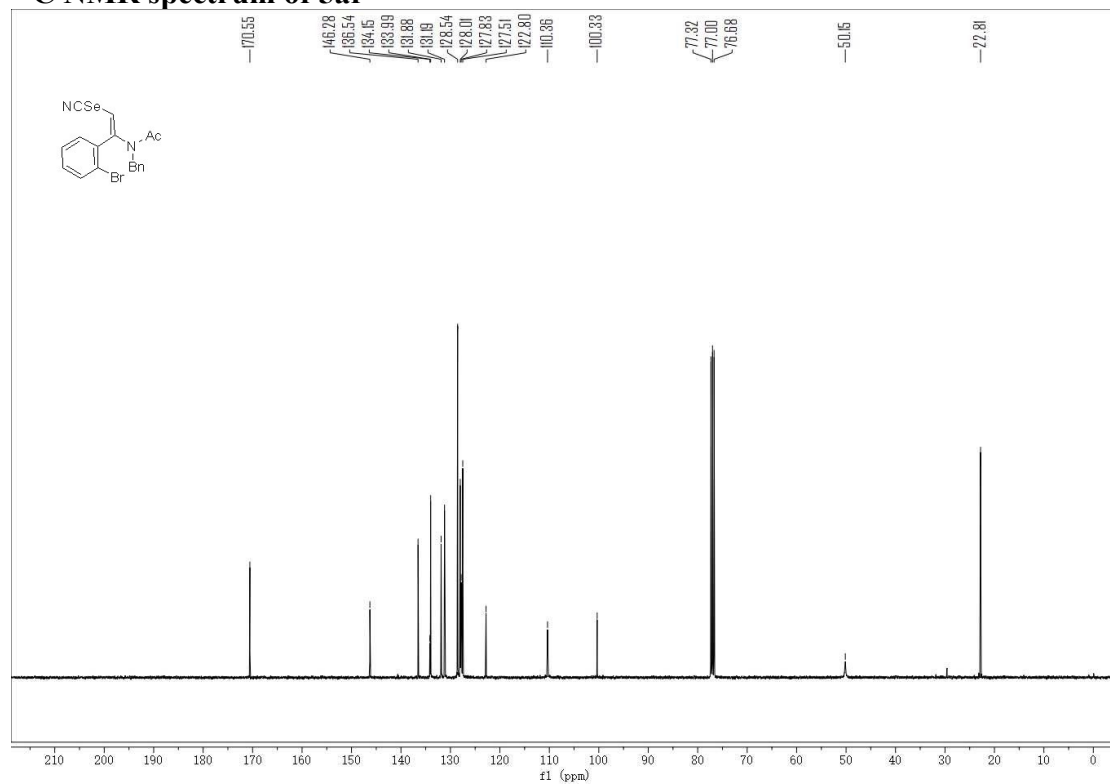

### <sup>1</sup>H NMR spectrum of 5ag

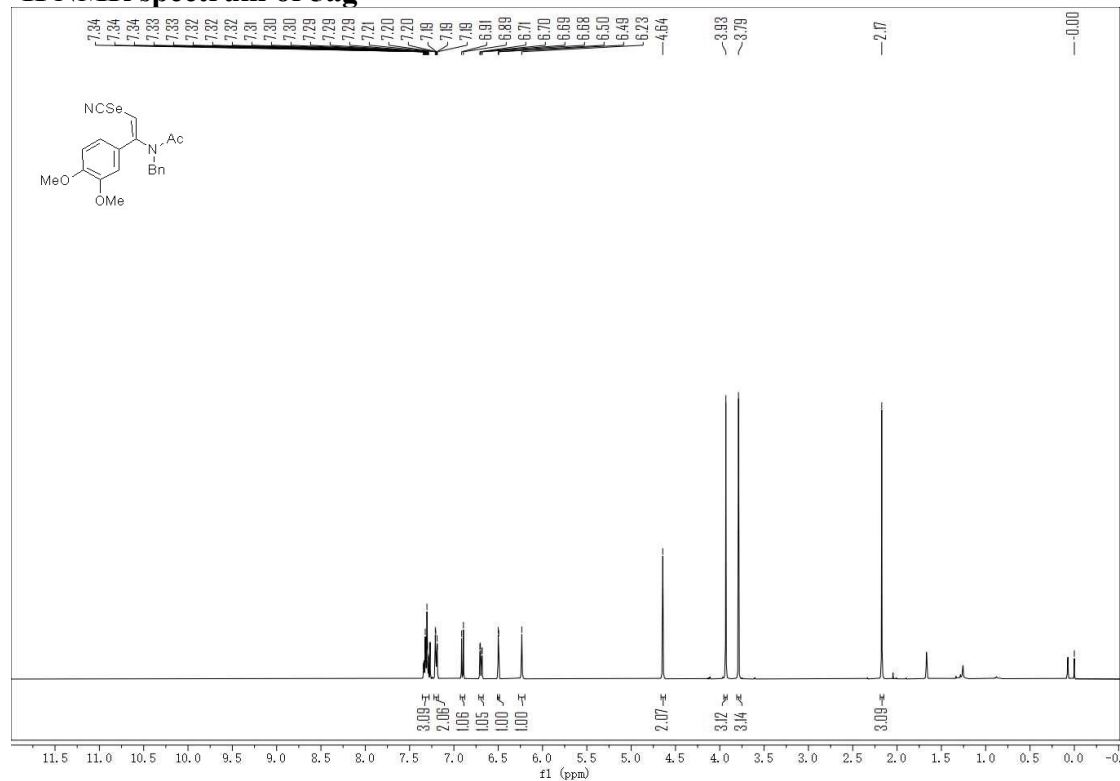

### <sup>13</sup>C NMR spectrum of 5ag

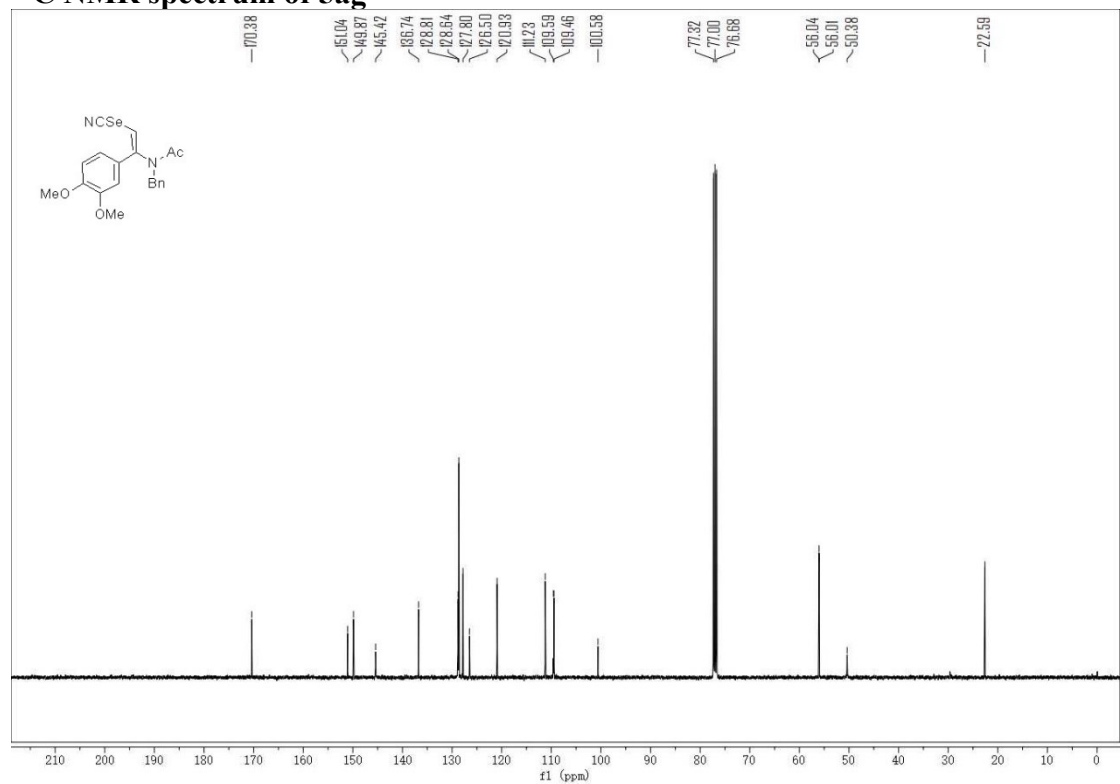

### <sup>1</sup>H NMR spectrum of 5ah

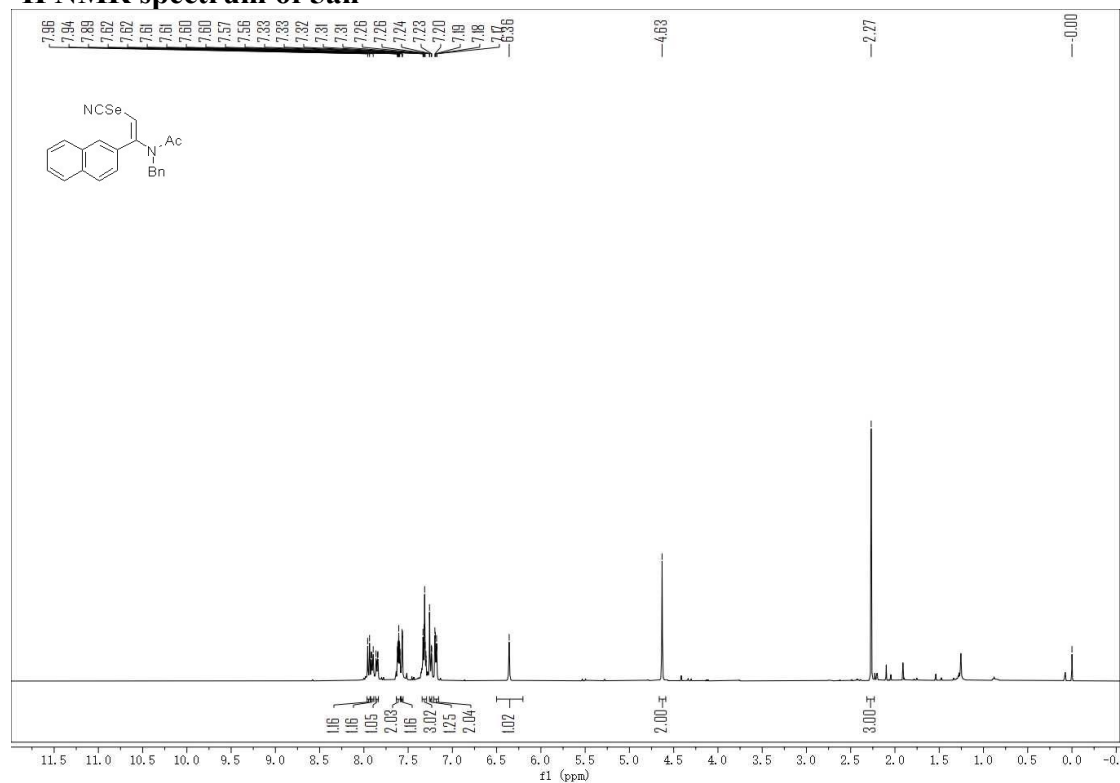

### <sup>13</sup>C NMR spectrum of 5ah

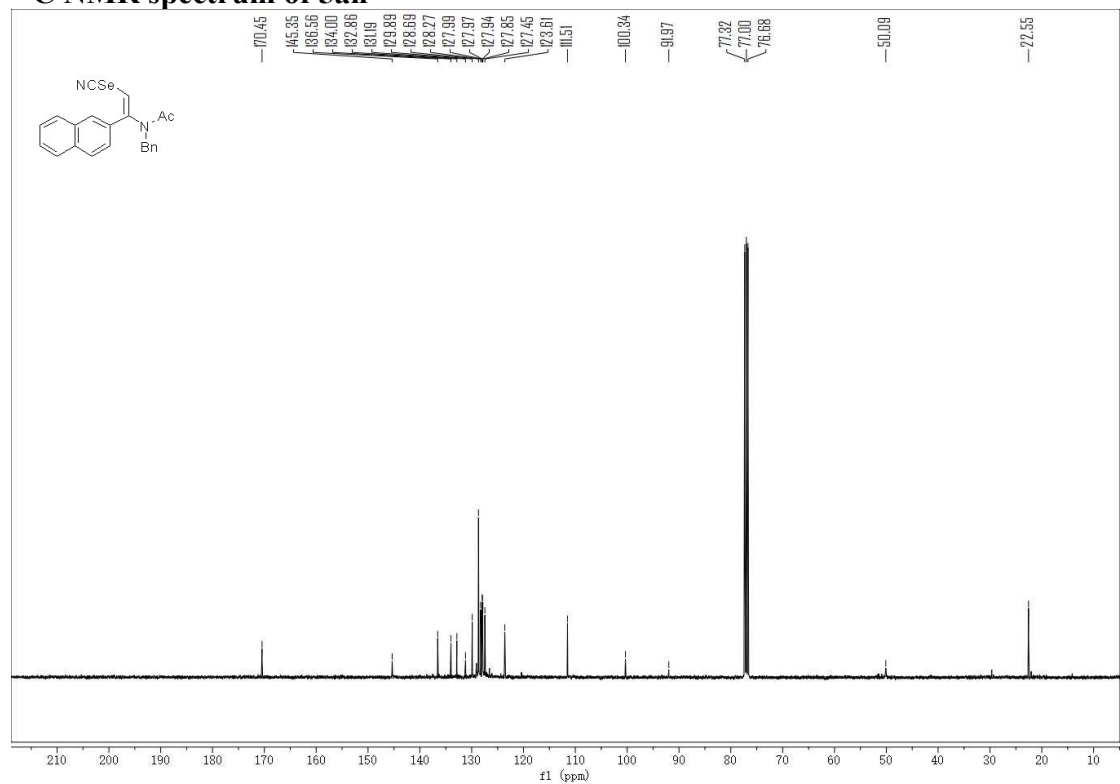

### <sup>1</sup>H NMR spectrum of 5ai

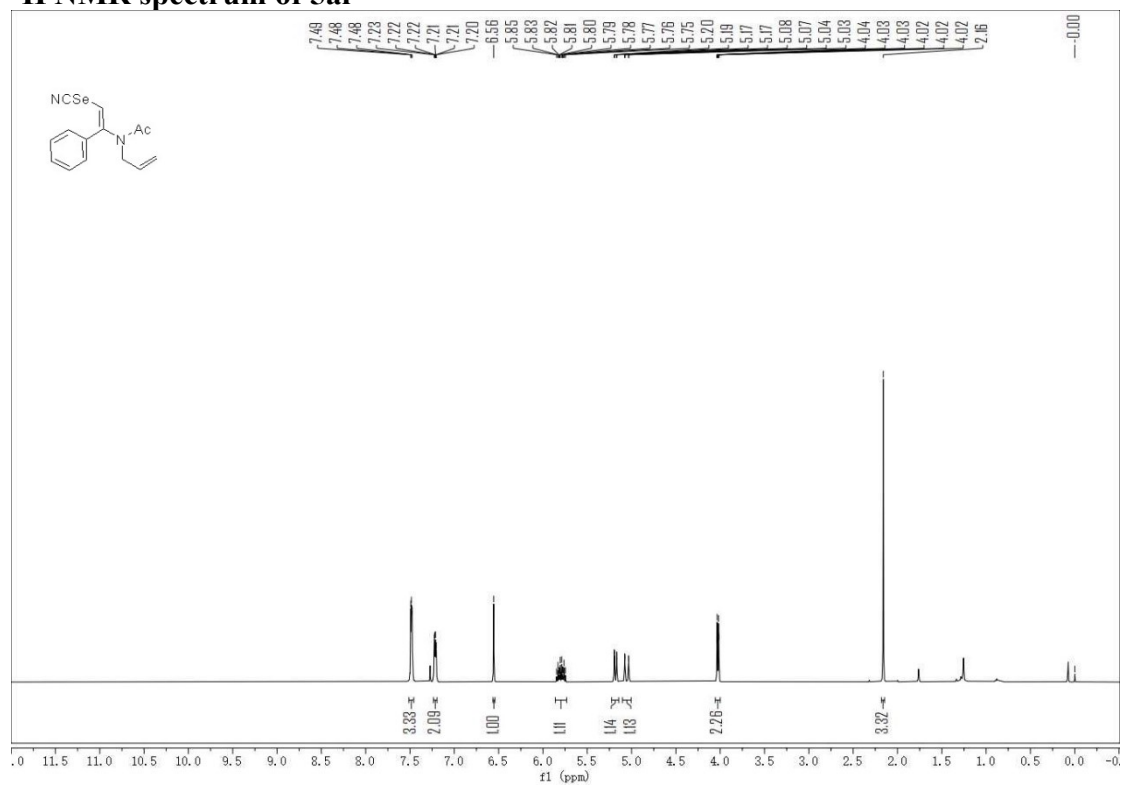

### <sup>13</sup>C NMR spectrum of 5ai

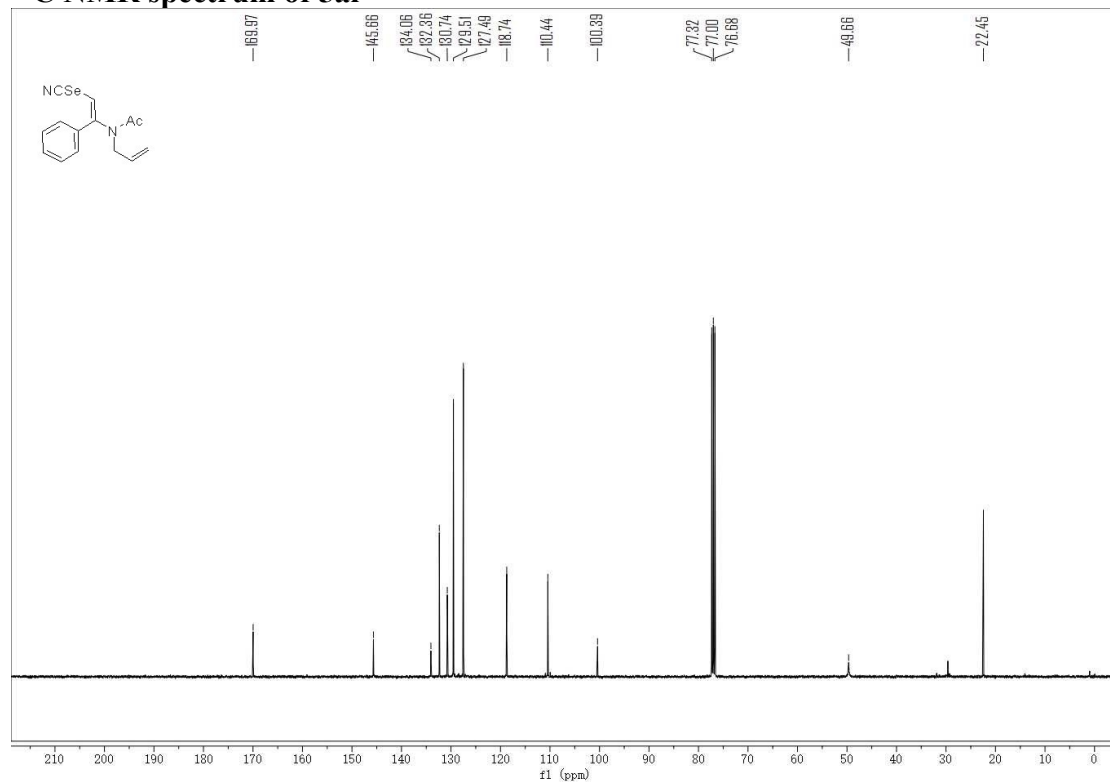

### <sup>1</sup>H NMR spectrum of 6

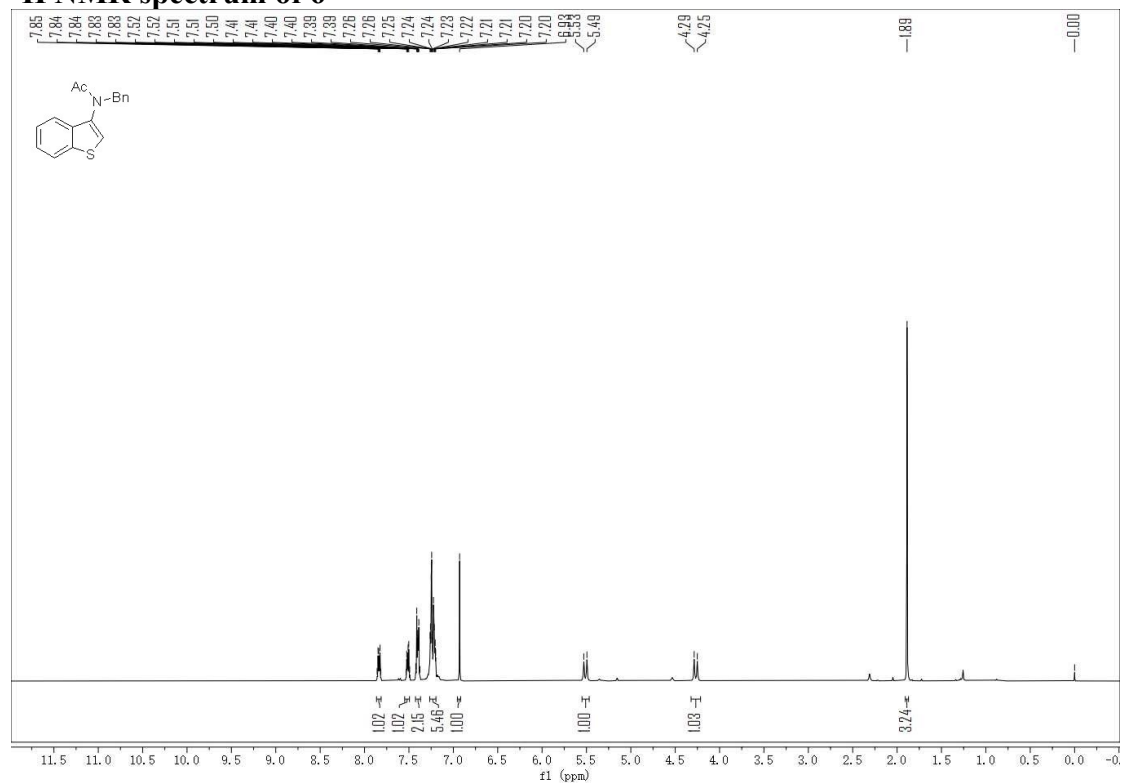

### <sup>13</sup>C NMR spectrum of 6

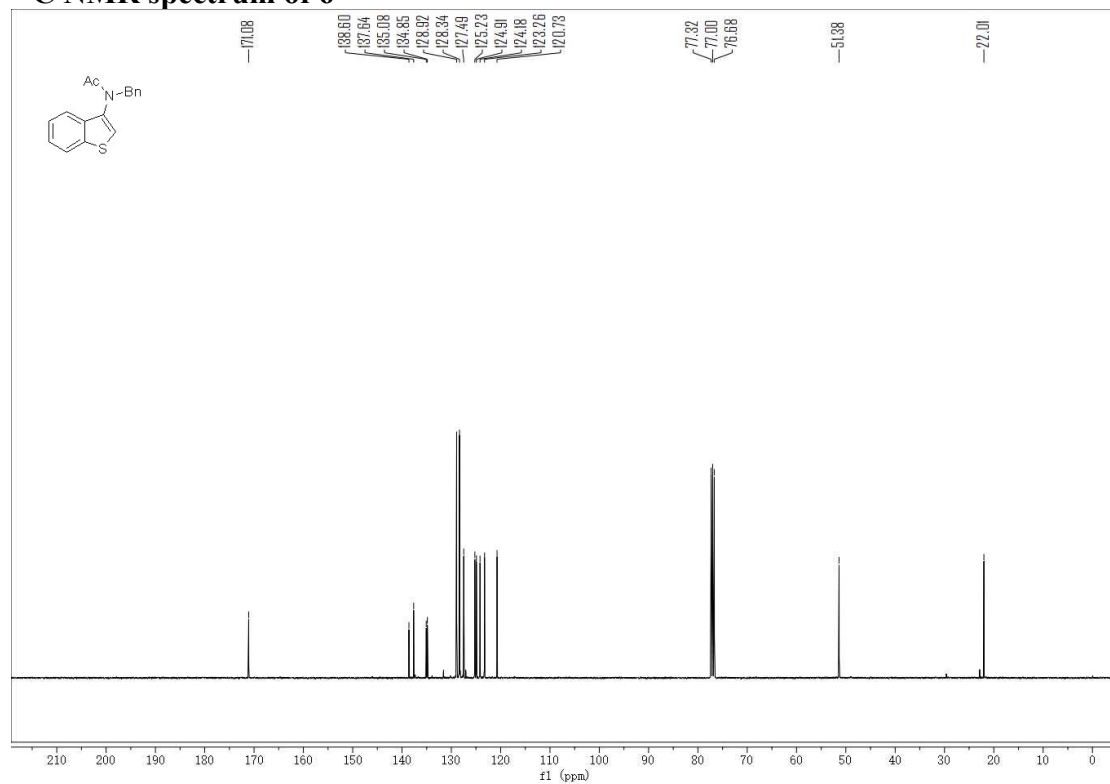

### <sup>1</sup>H NMR spectrum of 7

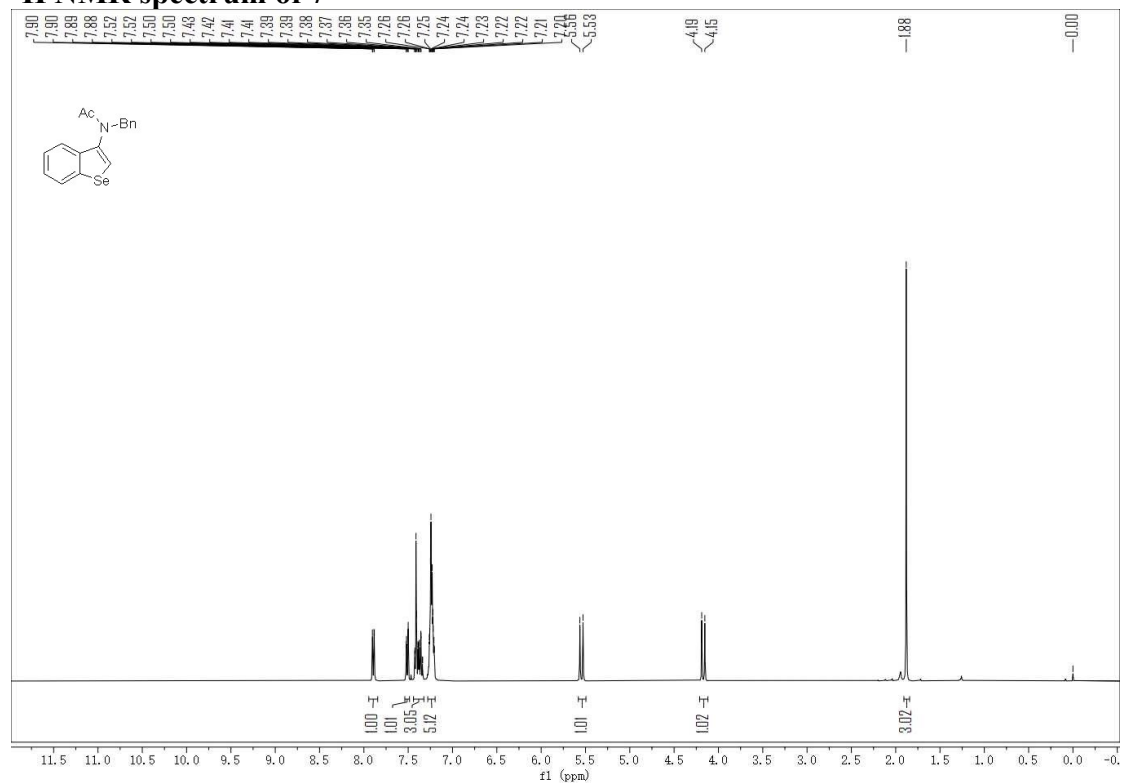

### <sup>13</sup>C NMR spectrum of 7

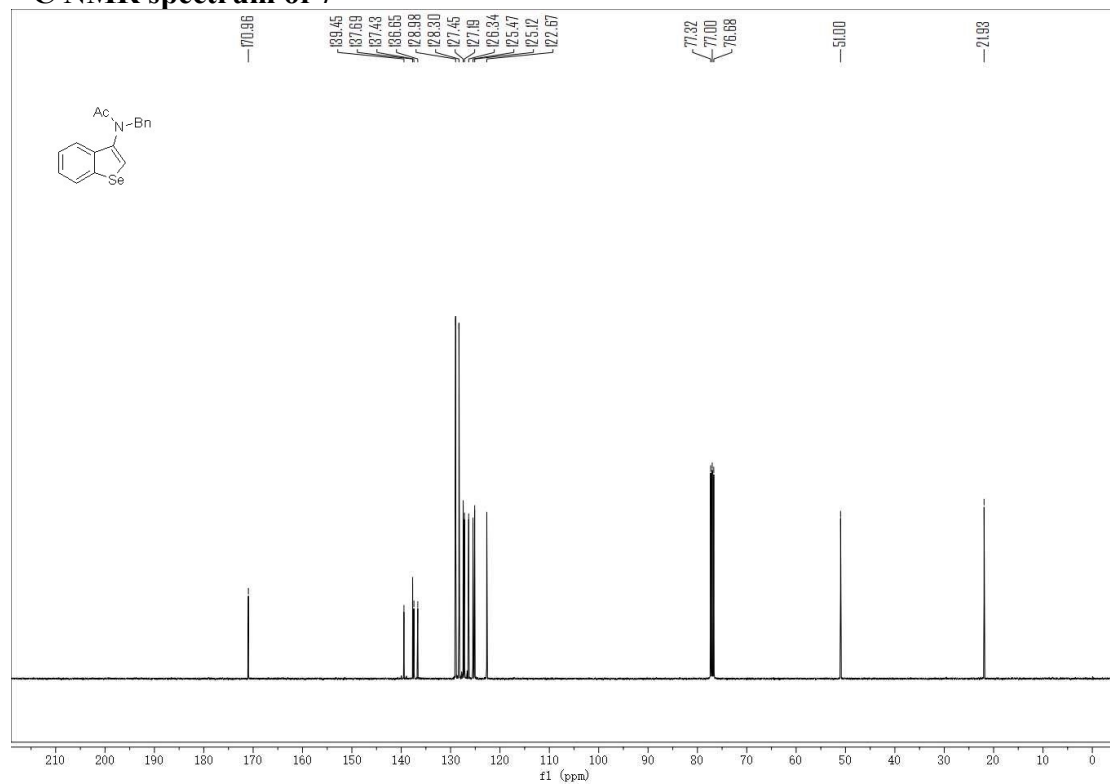

### <sup>1</sup>H NMR spectrum of 8

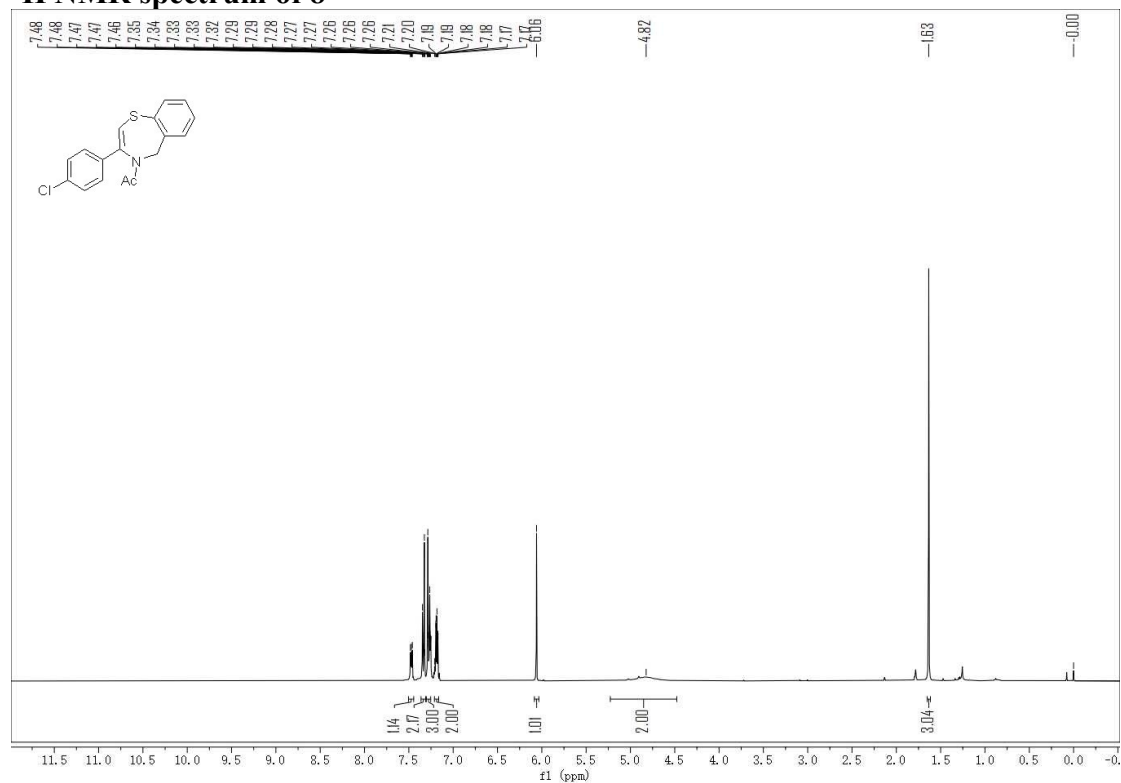

### <sup>13</sup>C NMR spectrum of 8

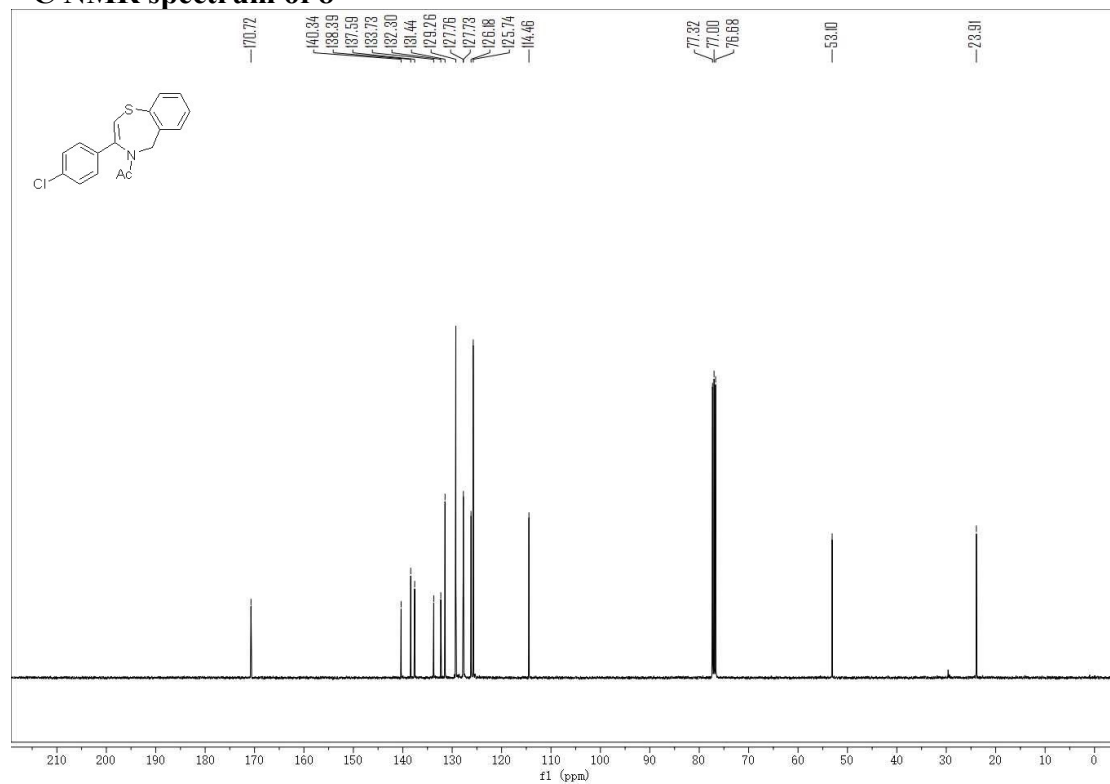



### <sup>1</sup>H NMR spectrum of 9

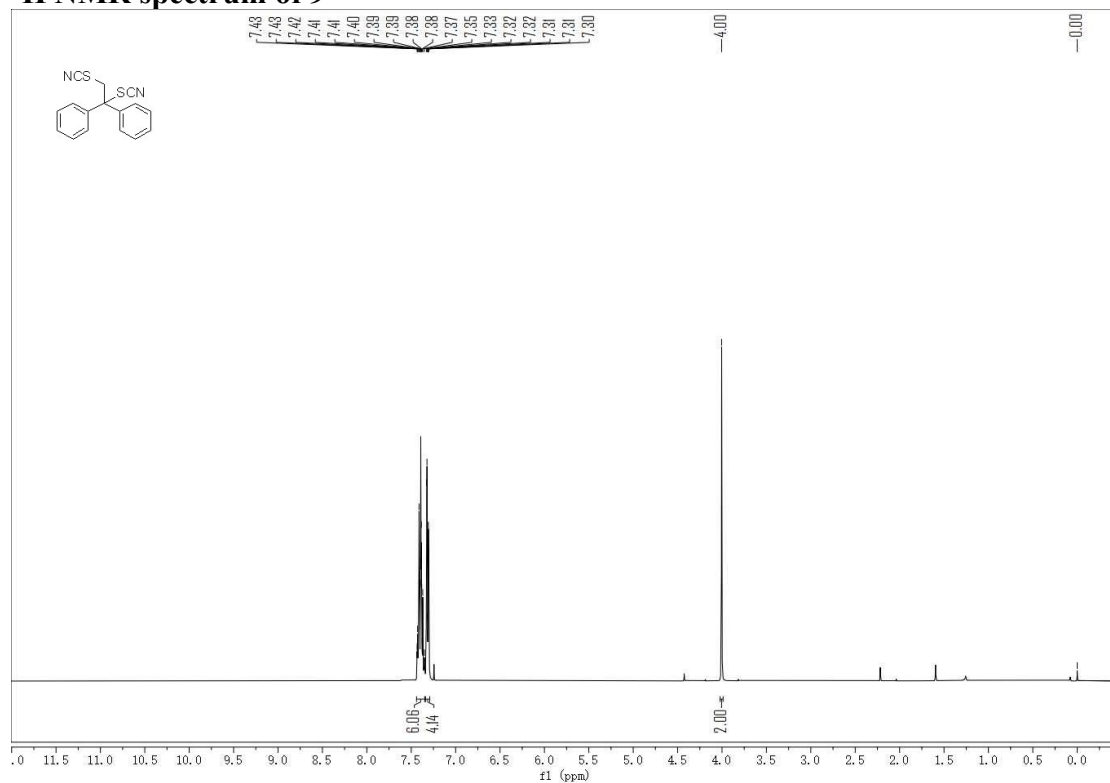

### <sup>13</sup>C NMR spectrum of 9

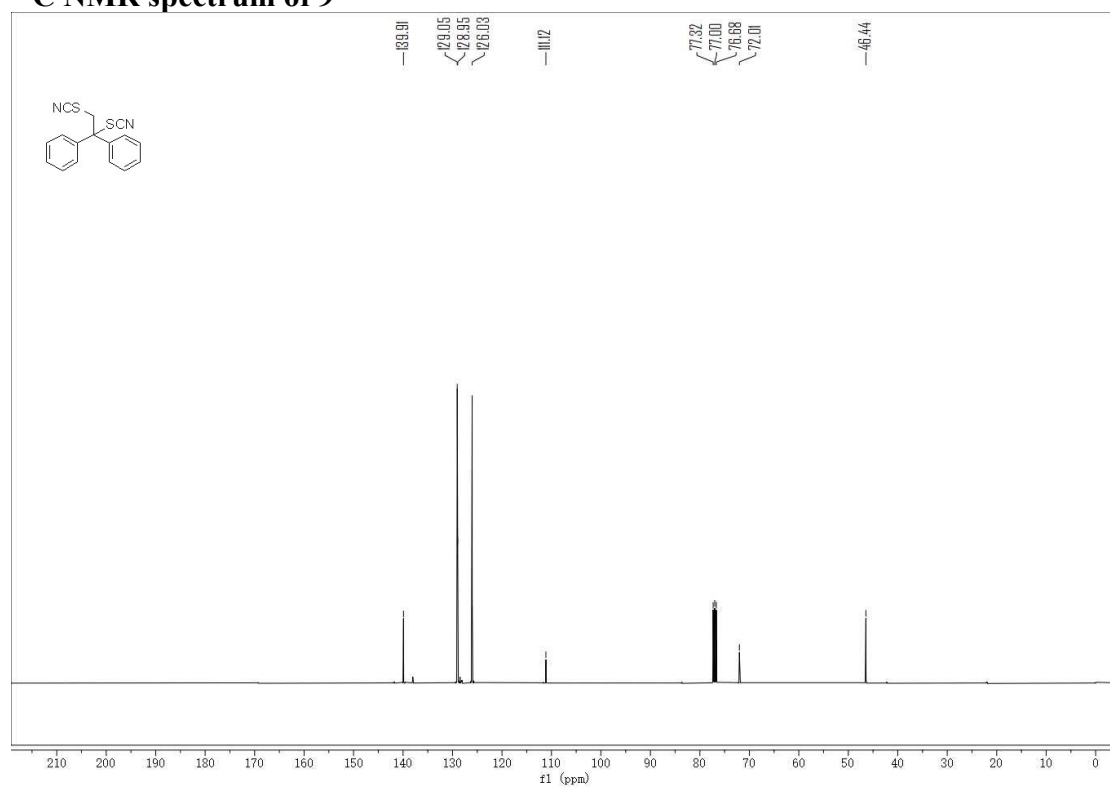

# <sup>1</sup>H NMR spectrum of 10

20220518FC0012-ZXB10

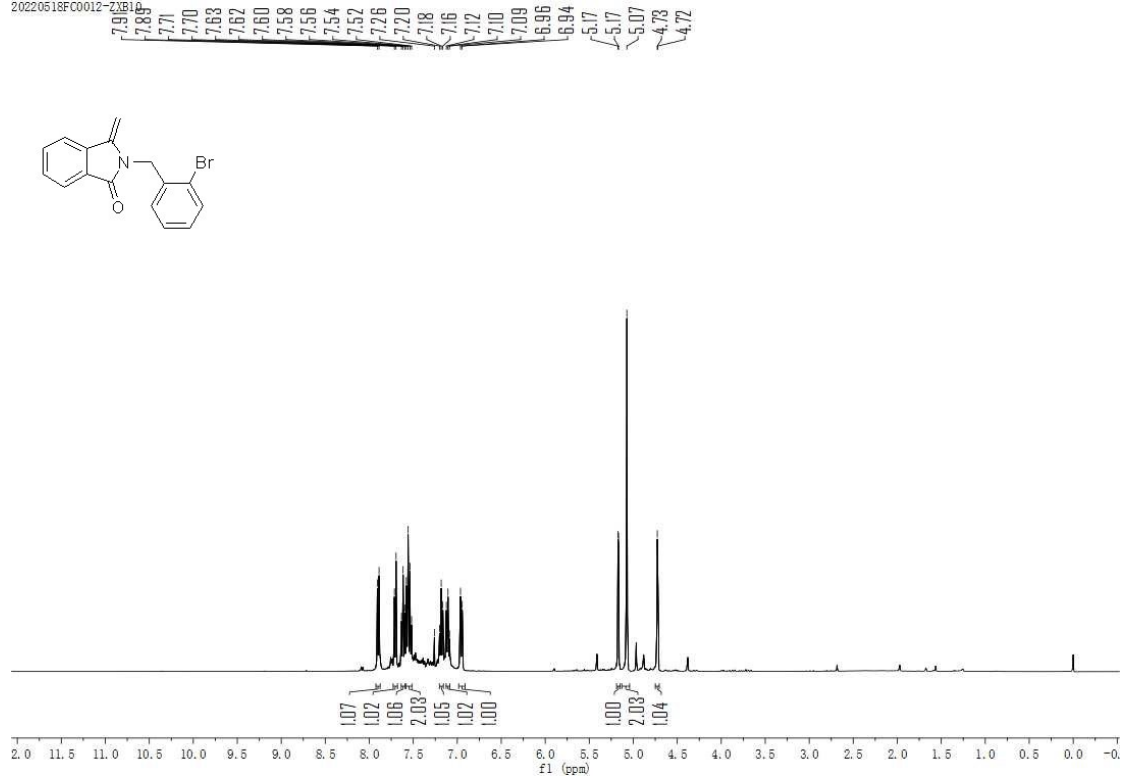

# <sup>13</sup>C NMR spectrum of 10

20220518FC0012-ZXB10

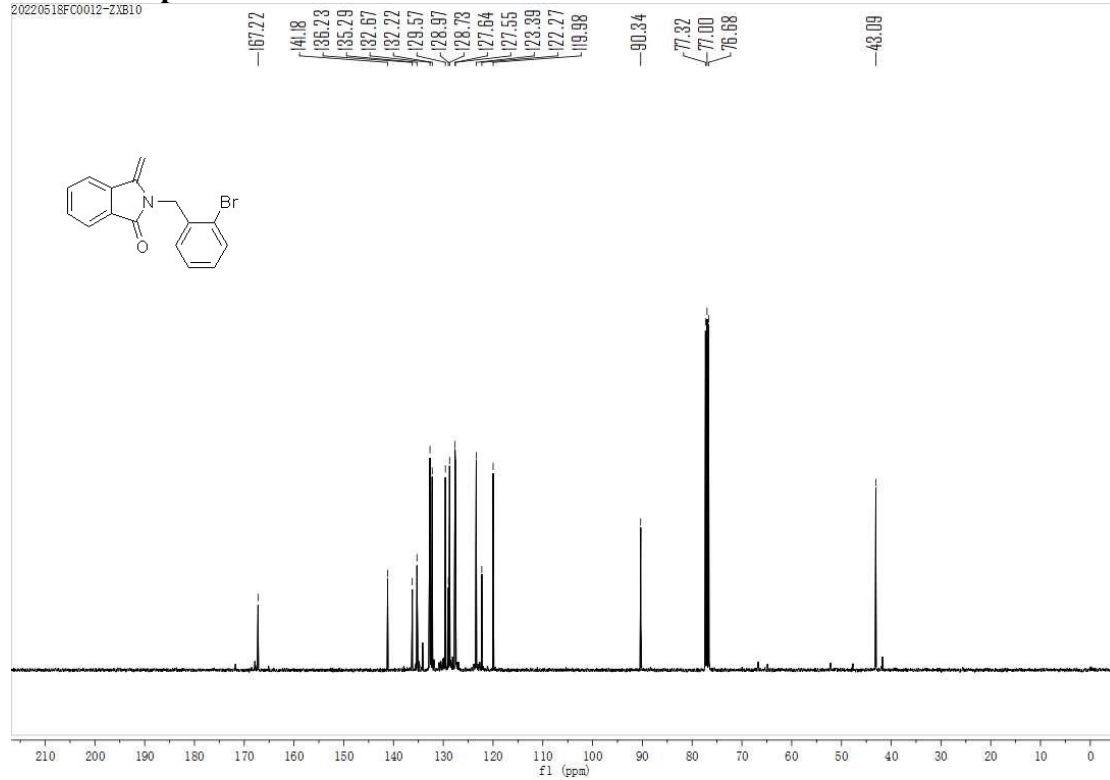

### <sup>1</sup>H NMR spectrum of 11

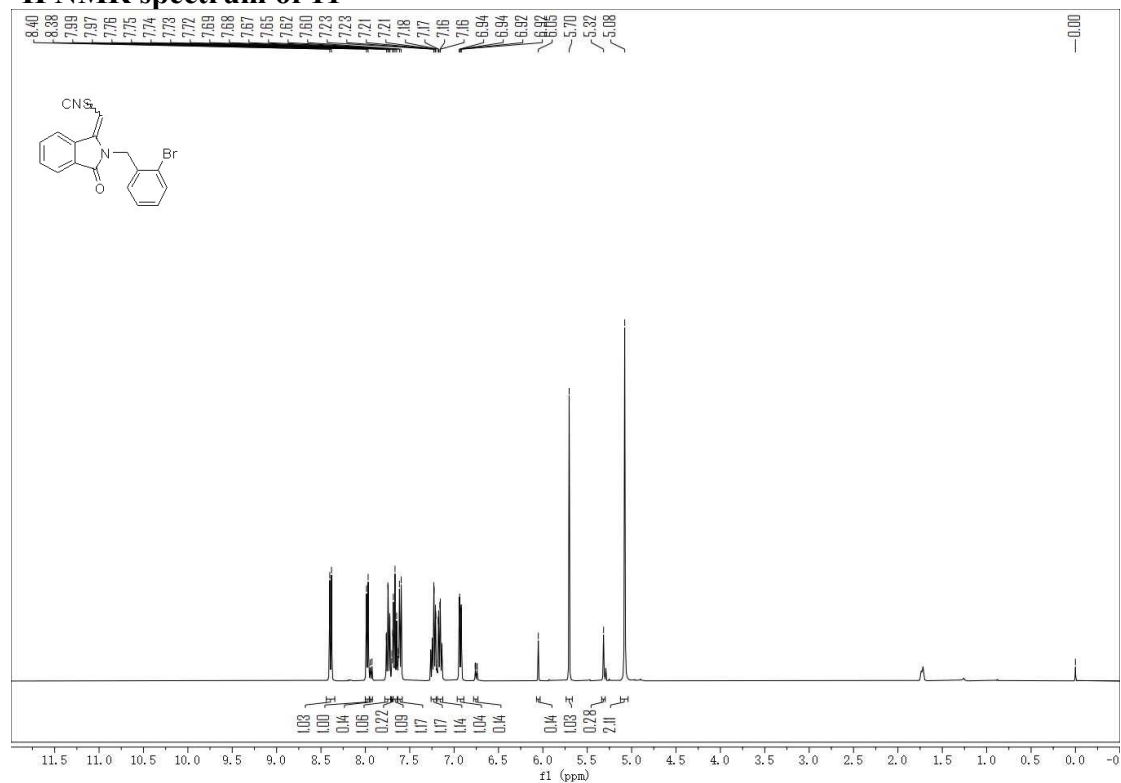

### <sup>13</sup>C NMR spectrum of 11

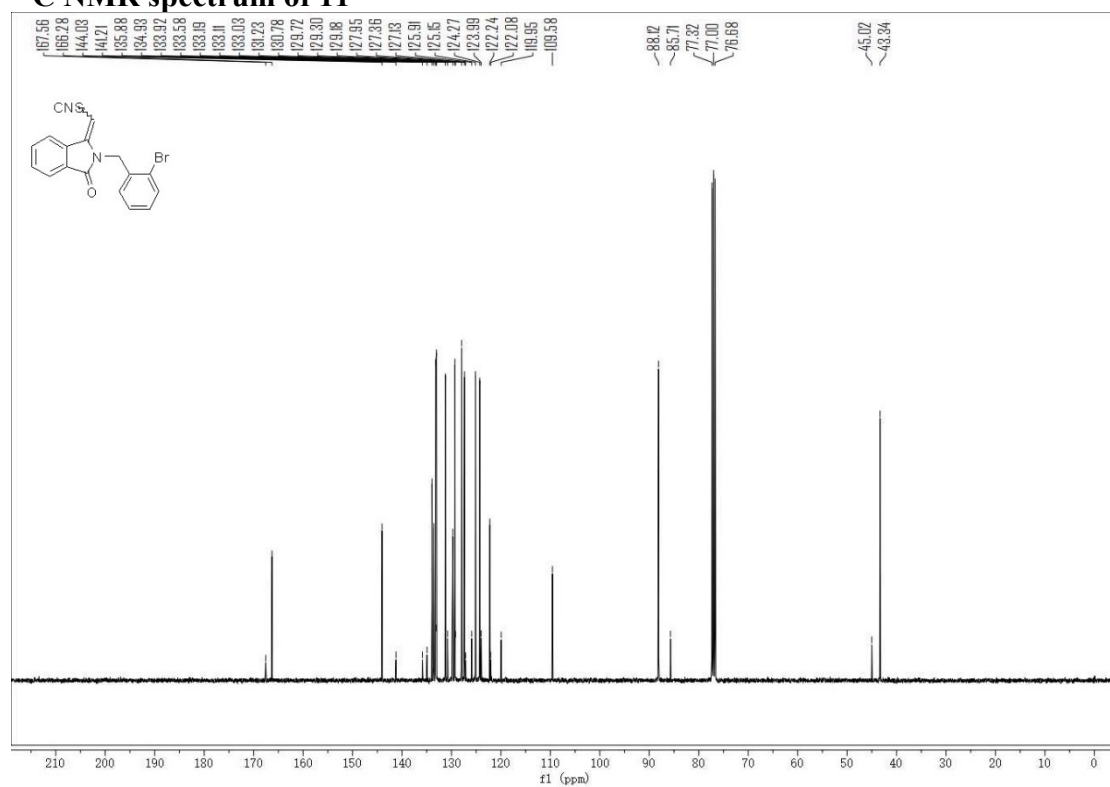

### <sup>1</sup>H NMR spectrum of *E* isomer of 11

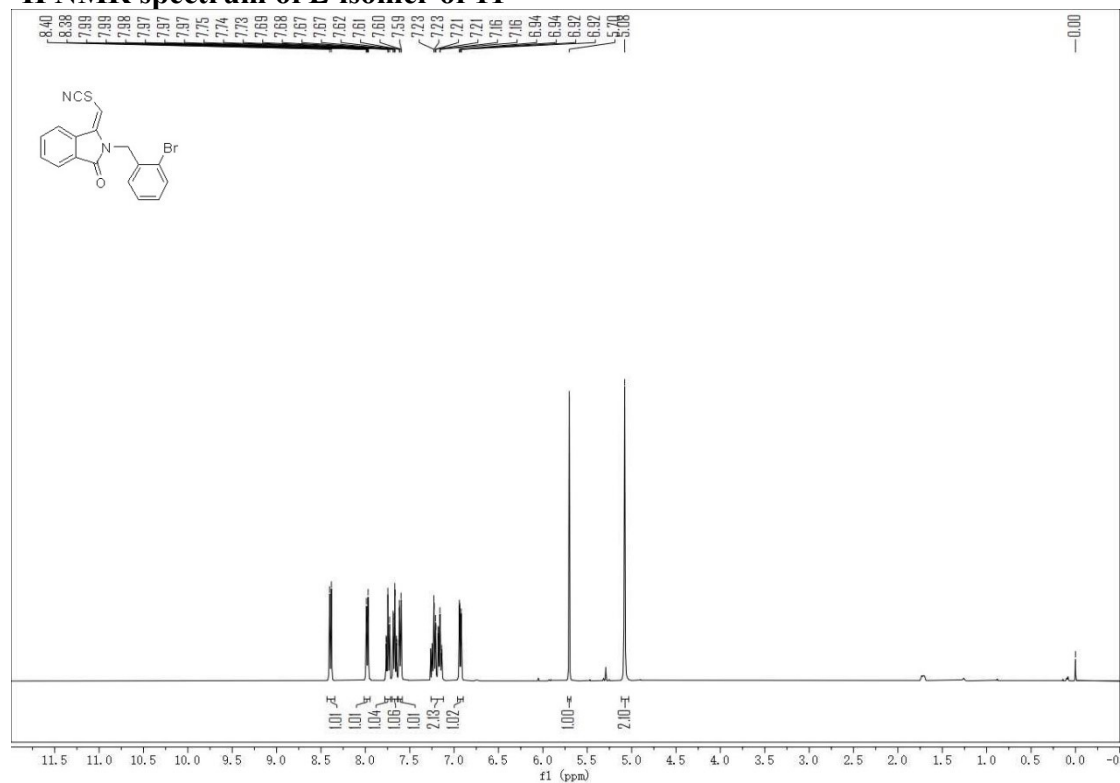

### <sup>13</sup>C NMR spectrum of *E* isomer of 11

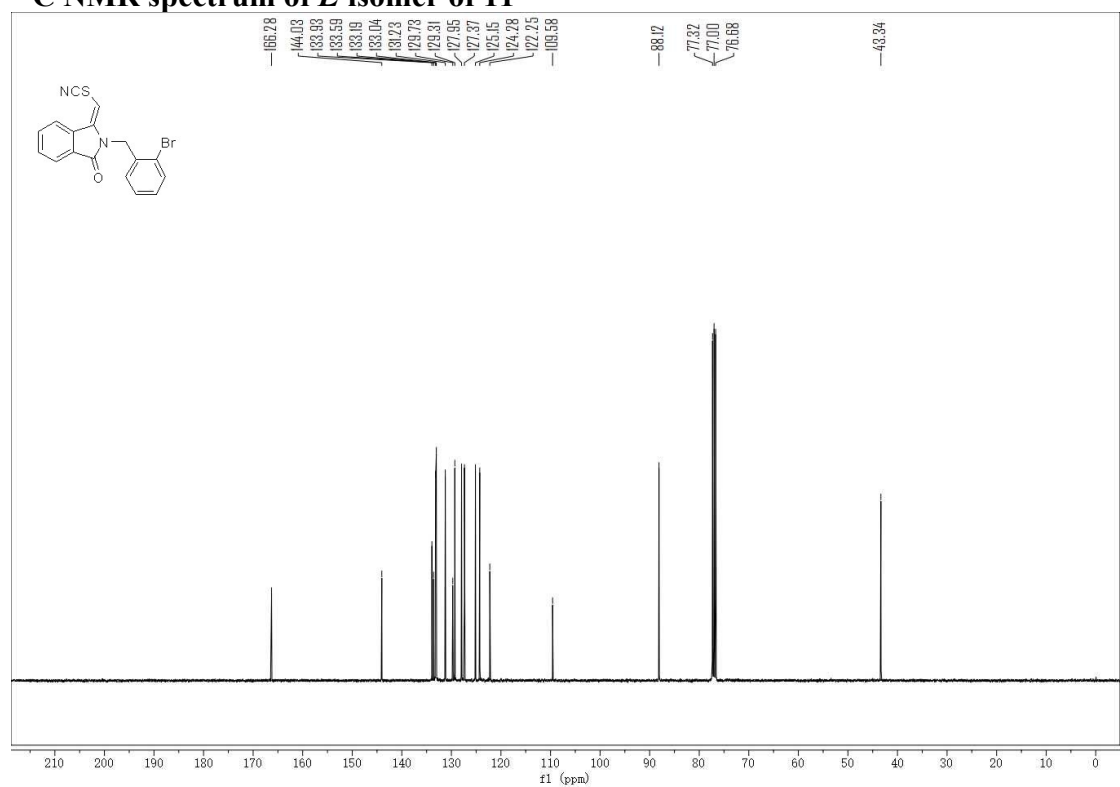

Supplement: d2gc01932a1.pdf [file d2gc01932a1.pdf]
